# Supplementary material for: De Novo Sequencing and Analysis of the Safflower Transcriptome to Discover Putative Genes Associated with Safflor Yellow in Carthamus tinctorius L
Source: Int J Mol Sci. 2015 Oct 26;16(10):25657–77. doi: 10.3390/ijms161025657 (PMC4632820; doi:10.3390/ijms161025657)
Supplement: Supplementary file 1 [file ijms-16-25657-s001.zip › ijms-100681-Table Supplementary.xlsx]

## Sheet: Table S1
Table S1 Go annotation of all safflower unigenes
Ontology	Class	genes_of_Early	genes_of_Full	number_of_Early	number_of_Full
biological_process	biological adhesion	unigene_c523;unigene_c8671;unigene_rep_c22960	unigene_c16420;unigene_c523;unigene_c8671;unigene_rep_c22960;unigene_rep_c27042	3	5
biological_process	biological regulation	unigene_c1612;unigene_c20700;unigene_c1536;unigene_c2411;unigene_c623;unigene_rep_c21066;unigene_rep_c21550;unigene_rep_c21874;unigene_rep_c22065;unigene_rep_c22497;unigene_rep_c23180;unigene_rep_c31791;unigene_rep_c32091;unigene_s51256;unigene_c10229;unigene_c10873;unigene_c1125;unigene_c12025;unigene_c12249;unigene_c1248;unigene_c12648;unigene_c12980;unigene_c13458;unigene_c13602;unigene_c13817…	unigene_c1612;unigene_c20700;unigene_s42948;unigene_c1536;unigene_c2411;unigene_c623;unigene_rep_c21066;unigene_rep_c21550;unigene_rep_c21874;unigene_rep_c22065;unigene_rep_c22497;unigene_rep_c23180;unigene_rep_c31791;unigene_rep_c32091;unigene_rep_c32876;unigene_rep_c26620;unigene_rep_c33562;unigene_c10563;unigene_c10873;unigene_c1125;unigene_c12025;unigene_c12249;unigene_c1248;unigene_c12980;un…	1264	1247
biological_process	cell killing	unigene_c6978	unigene_c6978	1	1
biological_process	cellular component organization or biogenesis	unigene_c1055;unigene_c106;unigene_c15485;unigene_c4949;unigene_rep_c28216;unigene_c11607;unigene_c1903;unigene_rep_c21877;unigene_rep_c24552;unigene_rep_c27876;unigene_c10929;unigene_c11085;unigene_c11107;unigene_c11111;unigene_c11266;unigene_c11389;unigene_c11404;unigene_c11419;unigene_c1150;unigene_c11608;unigene_c1199;unigene_c12071;unigene_c12289;unigene_c12589;unigene_c127;unigene_c12716;un…	unigene_c1055;unigene_c106;unigene_c15485;unigene_c4949;unigene_c9683;unigene_rep_c28216;unigene_c1903;unigene_rep_c21877;unigene_rep_c24552;unigene_rep_c27876;unigene_c11085;unigene_c11111;unigene_c11266;unigene_c11404;unigene_c1150;unigene_c11608;unigene_c12071;unigene_c12289;unigene_c12589;unigene_c127;unigene_c12716;unigene_c12764;unigene_c1334;unigene_c13449;unigene_c13523;unigene_c14566;uni…	1147	1117
biological_process	cellular process	unigene_c19438;unigene_c20199;unigene_c2743;unigene_c4850;unigene_c590;unigene_c695;unigene_rep_c23523;unigene_c12360;unigene_c12406;unigene_c7094;unigene_c7287;unigene_rep_c20948;unigene_c11332;unigene_c15308;unigene_c561;unigene_rep_c20939;unigene_rep_c28454;unigene_rep_c30431;unigene_rep_c30784;unigene_rep_c31606;unigene_c13627;unigene_c1757;unigene_c18942;unigene_c20646;unigene_c2610;unigene_…		7027	6886
biological_process	death	unigene_c19714;unigene_c540;unigene_rep_c21361;unigene_rep_c21436;unigene_rep_c22229;unigene_rep_c22774;unigene_rep_c33433;unigene_c3633;unigene_c4750;unigene_c7420;unigene_c967;unigene_c5946;unigene_rep_c25118;unigene_rep_c21147;unigene_c3151;unigene_c9004;unigene_rep_c23246;unigene_rep_c31820;unigene_c10686;unigene_c2095;unigene_c4202;unigene_c4799;unigene_c7872;unigene_rep_c21311;unigene_rep_c…	unigene_c19714;unigene_c540;unigene_rep_c21361;unigene_rep_c21436;unigene_rep_c22229;unigene_rep_c22774;unigene_c3633;unigene_c4750;unigene_c7420;unigene_c967;unigene_c5946;unigene_rep_c25118;unigene_rep_c21147;unigene_c3151;unigene_c9004;unigene_rep_c23246;unigene_rep_c31820;unigene_c10686;unigene_c2095;unigene_c4202;unigene_c4799;unigene_c7872;unigene_rep_c21311;unigene_rep_c22421;unigene_rep_c…	55	55
biological_process	developmental process	unigene_c18733;unigene_c18874;unigene_c2434;unigene_c7294;unigene_rep_c26523;unigene_rep_c34630;unigene_c10388;unigene_c11389;unigene_c1162;unigene_c1182;unigene_c12698;unigene_c12934;unigene_c13933;unigene_c14575;unigene_c15895;unigene_c1962;unigene_c19755;unigene_c19936;unigene_c2179;unigene_c2363;unigene_c2520;unigene_c27101;unigene_c2764;unigene_c28;unigene_c2851;unigene_c3146;unigene_c3703;u…	unigene_c14369;unigene_c16616;unigene_c18733;unigene_c18874;unigene_c2434;unigene_c7294;unigene_rep_c26523;unigene_rep_c34630;unigene_c10388;unigene_c1162;unigene_c1182;unigene_c12698;unigene_c12934;unigene_c13933;unigene_c14575;unigene_c15895;unigene_c16356;unigene_c1962;unigene_c19755;unigene_c19936;unigene_c2179;unigene_c2363;unigene_c2520;unigene_c27101;unigene_c2764;unigene_c28;unigene_c2851…	1368	1375
biological_process	establishment of localization	unigene_c19438;unigene_c20199;unigene_c2743;unigene_c4850;unigene_c590;unigene_c695;unigene_rep_c23523;unigene_c13627;unigene_c1757;unigene_c18942;unigene_c20646;unigene_c2610;unigene_c629;unigene_c866;unigene_rep_c21452;unigene_rep_c21490;unigene_rep_c22130;unigene_rep_c31769;unigene_rep_c31933;unigene_rep_c31936;unigene_rep_c32582;unigene_rep_c32763;unigene_rep_c35298;unigene_s49552;unigene_s50…	unigene_c19438;unigene_c20199;unigene_c2743;unigene_c4850;unigene_c590;unigene_c695;unigene_rep_c23523;unigene_c14730;unigene_c16335;unigene_c1757;unigene_c20646;unigene_c2610;unigene_c629;unigene_c866;unigene_rep_c21452;unigene_rep_c21490;unigene_rep_c22130;unigene_rep_c24588;unigene_rep_c31769;unigene_rep_c31933;unigene_rep_c31936;unigene_rep_c32763;unigene_c1536;unigene_c2411;unigene_c623;unig…	1653	1595
biological_process	growth	unigene_c1084;unigene_c15128;unigene_c443;unigene_c9265;unigene_rep_c22459;unigene_rep_c22460;unigene_rep_c32980;unigene_c7170;unigene_c12635;unigene_c13648;unigene_c14274;unigene_c1576;unigene_c18945;unigene_c19231;unigene_c1958;unigene_c301;unigene_c306;unigene_c3118;unigene_c4340;unigene_c4704;unigene_c6141;unigene_c7720;unigene_c863;unigene_c9046;unigene_rep_c21323;unigene_rep_c21339;unigene_…	unigene_c1084;unigene_c15128;unigene_c443;unigene_c9265;unigene_rep_c22459;unigene_rep_c22460;unigene_rep_c32980;unigene_c16576;unigene_c6989;unigene_c7170;unigene_c12635;unigene_c1576;unigene_c16356;unigene_c18945;unigene_c19231;unigene_c1958;unigene_c301;unigene_c306;unigene_c3118;unigene_c4340;unigene_c4704;unigene_c6141;unigene_c7720;unigene_c863;unigene_rep_c21323;unigene_rep_c21339;unigene_…	114	110
biological_process	immune system process	unigene_c19714;unigene_c540;unigene_rep_c21361;unigene_rep_c21436;unigene_rep_c22229;unigene_rep_c22774;unigene_rep_c33433;unigene_c12387;unigene_c12692;unigene_c1527;unigene_c177;unigene_c17868;unigene_c184;unigene_c18876;unigene_c19423;unigene_c2391;unigene_c3625;unigene_c7021;unigene_c746;unigene_c7478;unigene_rep_c32524;unigene_c15308;unigene_c20514;unigene_c3420;unigene_rep_c20939;unigene_re…	unigene_c19714;unigene_c540;unigene_rep_c21361;unigene_rep_c21436;unigene_rep_c22229;unigene_rep_c22774;unigene_c12387;unigene_c1527;unigene_c16104;unigene_c177;unigene_c17868;unigene_c184;unigene_c18876;unigene_c19423;unigene_c2071;unigene_c2391;unigene_c3625;unigene_c7021;unigene_c746;unigene_c7478;unigene_rep_c32524;unigene_c15308;unigene_c20514;unigene_c3420;unigene_c9929;unigene_rep_c20939;u…	83	86
biological_process	localization	unigene_c19438;unigene_c20199;unigene_c2743;unigene_c4850;unigene_c590;unigene_c695;unigene_rep_c23523;unigene_c13627;unigene_c1757;unigene_c18942;unigene_c20646;unigene_c2610;unigene_c629;unigene_c866;unigene_rep_c21452;unigene_rep_c21490;unigene_rep_c22130;unigene_rep_c31769;unigene_rep_c31933;unigene_rep_c31936;unigene_rep_c32582;unigene_rep_c32763;unigene_rep_c35298;unigene_s49552;unigene_s50…	unigene_c19438;unigene_c20199;unigene_c2743;unigene_c4850;unigene_c590;unigene_c695;unigene_rep_c23523;unigene_c14730;unigene_c16335;unigene_c1757;unigene_c20646;unigene_c2610;unigene_c629;unigene_c866;unigene_rep_c21452;unigene_rep_c21490;unigene_rep_c22130;unigene_rep_c24588;unigene_rep_c31769;unigene_rep_c31933;unigene_rep_c31936;unigene_rep_c32763;unigene_c1536;unigene_c2411;unigene_c623;unig…	1817	1753
biological_process	locomotion	unigene_c1757;unigene_c20646;unigene_c415;unigene_c866	unigene_c1757;unigene_c20646;unigene_c415;unigene_c866	4	4
biological_process	metabolic process	unigene_c12360;unigene_c12406;unigene_c7094;unigene_c7287;unigene_rep_c20948;unigene_c11332;unigene_c15308;unigene_c561;unigene_rep_c20939;unigene_rep_c28454;unigene_rep_c30431;unigene_rep_c30784;unigene_rep_c31606;unigene_c1894;unigene_c20327;unigene_c5063;unigene_rep_c22117;unigene_rep_c23919;unigene_rep_c34440;unigene_rep_c35803;unigene_c1612;unigene_c20700;unigene_rep_c22835;unigene_c17778;un…		7107	7010
biological_process	multi-organism process	unigene_c11446;unigene_c127;unigene_c156;unigene_c1756;unigene_c17938;unigene_c19346;unigene_c19944;unigene_c2661;unigene_c2847;unigene_c3361;unigene_c3383;unigene_c3964;unigene_c4017;unigene_c470;unigene_c4878;unigene_c5327;unigene_c7289;unigene_c9875;unigene_rep_c21477;unigene_rep_c21525;unigene_rep_c21999;unigene_rep_c22583;unigene_rep_c23021;unigene_rep_c24406;unigene_rep_c31247;unigene_rep_c…	unigene_c11446;unigene_c127;unigene_c156;unigene_c15620;unigene_c16016;unigene_c1756;unigene_c19346;unigene_c19944;unigene_c2661;unigene_c2847;unigene_c3361;unigene_c3383;unigene_c3964;unigene_c4017;unigene_c470;unigene_c4878;unigene_c5327;unigene_c7289;unigene_c9875;unigene_rep_c21477;unigene_rep_c21525;unigene_rep_c21999;unigene_rep_c22583;unigene_rep_c23021;unigene_rep_c24215;unigene_rep_c3124…	323	320
biological_process	multicellular organismal process	unigene_c10388;unigene_c11389;unigene_c1162;unigene_c1182;unigene_c12698;unigene_c12934;unigene_c13933;unigene_c14575;unigene_c15895;unigene_c1962;unigene_c19755;unigene_c19936;unigene_c2179;unigene_c2363;unigene_c2520;unigene_c27101;unigene_c2764;unigene_c28;unigene_c2851;unigene_c3146;unigene_c3703;unigene_c4359;unigene_c4555;unigene_c474;unigene_c4979;unigene_c5130;unigene_c5153;unigene_c5172;…	unigene_c10388;unigene_c1162;unigene_c1182;unigene_c12698;unigene_c12934;unigene_c13933;unigene_c14575;unigene_c15895;unigene_c16356;unigene_c1962;unigene_c19755;unigene_c19936;unigene_c2179;unigene_c2363;unigene_c2520;unigene_c27101;unigene_c2764;unigene_c28;unigene_c2851;unigene_c3146;unigene_c3703;unigene_c4359;unigene_c4555;unigene_c474;unigene_c4979;unigene_c5130;unigene_c5153;unigene_c5172;…	952	952
biological_process	negative regulation of biological process	unigene_c10864;unigene_c1430;unigene_c162;unigene_c1707;unigene_c2597;unigene_c3651;unigene_c3868;unigene_c4326;unigene_c4626;unigene_c7387;unigene_c7656;unigene_c9346;unigene_rep_c20910;unigene_rep_c21118;unigene_rep_c31813;unigene_rep_c34196;unigene_rep_c35103;unigene_rep_c35576;unigene_s48881;unigene_c2643;unigene_c1084;unigene_c15128;unigene_c443;unigene_c9265;unigene_rep_c22459;unigene_rep_c…	unigene_c10864;unigene_c1430;unigene_c162;unigene_c16515;unigene_c1707;unigene_c2597;unigene_c3651;unigene_c3868;unigene_c4326;unigene_c4626;unigene_c7387;unigene_c7656;unigene_c9346;unigene_rep_c20910;unigene_rep_c21118;unigene_rep_c31813;unigene_rep_c34196;unigene_rep_c35576;unigene_s41881;unigene_s44873;unigene_c2643;unigene_c1084;unigene_c15128;unigene_c443;unigene_c9265;unigene_rep_c22459;un…	113	118
biological_process	pigmentation	unigene_c11626;unigene_c1449;unigene_c17132;unigene_c17451;unigene_c2438;unigene_c2865;unigene_c3620;unigene_c6237;unigene_c6594;unigene_c6625;unigene_c8590;unigene_rep_c21517;unigene_rep_c35324;unigene_s45925;unigene_s48435;unigene_s51406;unigene_s51425;unigene_s51518;unigene_s51554	unigene_c11626;unigene_c1449;unigene_c17132;unigene_c2438;unigene_c2865;unigene_c3620;unigene_c6212;unigene_c6237;unigene_c6594;unigene_c6625;unigene_c8590;unigene_rep_c21517;unigene_rep_c33652;unigene_rep_c35324;unigene_rep_c36214;unigene_s44428;unigene_s44847	19	17
biological_process	positive regulation of biological process	unigene_rep_c21736;unigene_rep_c33193;unigene_c12387;unigene_c12692;unigene_c1527;unigene_c177;unigene_c17868;unigene_c184;unigene_c18876;unigene_c19423;unigene_c2391;unigene_c3625;unigene_c7021;unigene_c746;unigene_c7478;unigene_rep_c32524;unigene_c19712;unigene_c520;unigene_c25;unigene_c5946;unigene_rep_c25118;unigene_c1182;unigene_rep_c23121;unigene_rep_c27231;unigene_c1982;unigene_c12765;unig…	unigene_rep_c21736;unigene_rep_c33193;unigene_c12387;unigene_c1527;unigene_c16104;unigene_c177;unigene_c17868;unigene_c184;unigene_c18876;unigene_c19423;unigene_c2071;unigene_c2391;unigene_c3625;unigene_c7021;unigene_c746;unigene_c7478;unigene_rep_c32524;unigene_c19712;unigene_c520;unigene_c25;unigene_c5946;unigene_rep_c25118;unigene_c1182;unigene_rep_c23121;unigene_rep_c27231;unigene_c14754;unig…	33	38
biological_process	regulation of biological process	unigene_c1612;unigene_c20700;unigene_c1536;unigene_c2411;unigene_c623;unigene_rep_c21066;unigene_rep_c21550;unigene_rep_c21874;unigene_rep_c22065;unigene_rep_c22497;unigene_rep_c23180;unigene_rep_c31791;unigene_rep_c32091;unigene_s51256;unigene_c10229;unigene_c10873;unigene_c1125;unigene_c12025;unigene_c12249;unigene_c1248;unigene_c12648;unigene_c12980;unigene_c13458;unigene_c13602;unigene_c13817…	unigene_c1612;unigene_c20700;unigene_s42948;unigene_c1536;unigene_c2411;unigene_c623;unigene_rep_c21066;unigene_rep_c21550;unigene_rep_c21874;unigene_rep_c22065;unigene_rep_c22497;unigene_rep_c23180;unigene_rep_c31791;unigene_rep_c32091;unigene_rep_c32876;unigene_rep_c26620;unigene_rep_c33562;unigene_c10563;unigene_c10873;unigene_c1125;unigene_c12025;unigene_c12249;unigene_c1248;unigene_c12980;un…	868	846
biological_process	reproduction	unigene_c2202;unigene_c4891;unigene_rep_c21555;unigene_rep_c21878;unigene_rep_c22222;unigene_rep_c23597;unigene_rep_c26805;unigene_c11446;unigene_c127;unigene_c156;unigene_c1756;unigene_c17938;unigene_c19346;unigene_c19944;unigene_c2661;unigene_c2847;unigene_c3361;unigene_c3383;unigene_c3964;unigene_c4017;unigene_c470;unigene_c4878;unigene_c5327;unigene_c7289;unigene_c9875;unigene_rep_c21477;unig…	unigene_c2202;unigene_c4891;unigene_rep_c21555;unigene_rep_c21878;unigene_rep_c22222;unigene_rep_c23597;unigene_rep_c26805;unigene_rep_c34978;unigene_c11446;unigene_c127;unigene_c156;unigene_c15620;unigene_c16016;unigene_c1756;unigene_c19346;unigene_c19944;unigene_c2661;unigene_c2847;unigene_c3361;unigene_c3383;unigene_c3964;unigene_c4017;unigene_c470;unigene_c4878;unigene_c5327;unigene_c7289;uni…	675	688
biological_process	reproductive process	unigene_c2202;unigene_c4891;unigene_rep_c21555;unigene_rep_c21878;unigene_rep_c22222;unigene_rep_c23597;unigene_rep_c26805;unigene_c11446;unigene_c127;unigene_c156;unigene_c1756;unigene_c17938;unigene_c19346;unigene_c19944;unigene_c2661;unigene_c2847;unigene_c3361;unigene_c3383;unigene_c3964;unigene_c4017;unigene_c470;unigene_c4878;unigene_c5327;unigene_c7289;unigene_c9875;unigene_rep_c21477;unig…	unigene_c2202;unigene_c4891;unigene_rep_c21555;unigene_rep_c21878;unigene_rep_c22222;unigene_rep_c23597;unigene_rep_c26805;unigene_rep_c34978;unigene_c11446;unigene_c127;unigene_c156;unigene_c15620;unigene_c16016;unigene_c1756;unigene_c19346;unigene_c19944;unigene_c2661;unigene_c2847;unigene_c3361;unigene_c3383;unigene_c3964;unigene_c4017;unigene_c470;unigene_c4878;unigene_c5327;unigene_c7289;uni…	673	686
biological_process	response to stimulus	unigene_c1032;unigene_c10560;unigene_c10654;unigene_c10686;unigene_c10780;unigene_c109;unigene_c11033;unigene_c1149;unigene_c11552;unigene_c12540;unigene_c12598;unigene_c12781;unigene_c12922;unigene_c13008;unigene_c13012;unigene_c13014;unigene_c13102;unigene_c1363;unigene_c13666;unigene_c1380;unigene_c13920;unigene_c13965;unigene_c14012;unigene_c1412;unigene_c14157;unigene_c1438;unigene_c14748;un…		2459	2438
biological_process	rhythmic process	unigene_c15073;unigene_c19890;unigene_c25;unigene_c36;unigene_c3642;unigene_c3860;unigene_c7734;unigene_c8823;unigene_rep_c22567;unigene_rep_c22582;unigene_rep_c37491	unigene_c15073;unigene_c19890;unigene_c25;unigene_c36;unigene_c3642;unigene_c3860;unigene_c7734;unigene_c8823;unigene_rep_c22567;unigene_rep_c22582;unigene_rep_c24608;unigene_rep_c37491	11	12
biological_process	signaling	unigene_c1330;unigene_c14663;unigene_c1527;unigene_c1631;unigene_c18461;unigene_c186;unigene_c1974;unigene_c2432;unigene_c4378;unigene_c4416;unigene_c4850;unigene_c4970;unigene_c5097;unigene_c594;unigene_c620;unigene_c708;unigene_c7690;unigene_c8069;unigene_c9711;unigene_rep_c21951;unigene_rep_c22095;unigene_rep_c22396;unigene_rep_c22716;unigene_rep_c32508;unigene_rep_c33945;unigene_s49792;unigen…	unigene_c1330;unigene_c14663;unigene_c1527;unigene_c16104;unigene_c1631;unigene_c18461;unigene_c186;unigene_c1974;unigene_c2432;unigene_c4378;unigene_c4416;unigene_c4850;unigene_c4970;unigene_c5097;unigene_c594;unigene_c620;unigene_c708;unigene_c7690;unigene_c8069;unigene_c9711;unigene_rep_c21951;unigene_rep_c22095;unigene_rep_c22396;unigene_rep_c22716;unigene_rep_c32508;unigene_rep_c33945;unigen…	736	705
biological_process	signaling process	unigene_c10229;unigene_c10873;unigene_c1125;unigene_c12025;unigene_c12249;unigene_c1248;unigene_c12648;unigene_c12980;unigene_c13458;unigene_c13602;unigene_c13817;unigene_c15051;unigene_c1589;unigene_c16511;unigene_c17114;unigene_c17432;unigene_c17854;unigene_c17932;unigene_c18108;unigene_c18184;unigene_c18572;unigene_c18654;unigene_c18706;unigene_c18723;unigene_c19130;unigene_c1934;unigene_c1952…	unigene_c10563;unigene_c10873;unigene_c1125;unigene_c12025;unigene_c12249;unigene_c1248;unigene_c12980;unigene_c13458;unigene_c13817;unigene_c14891;unigene_c15051;unigene_c15619;unigene_c1589;unigene_c16511;unigene_c17114;unigene_c17432;unigene_c17932;unigene_c18108;unigene_c18654;unigene_c18706;unigene_c19130;unigene_c1934;unigene_c19524;unigene_c19714;unigene_c20839;unigene_c2365;unigene_c2500;…	414	388
biological_process	viral reproduction	unigene_c2202;unigene_c4891;unigene_rep_c21555;unigene_rep_c21878;unigene_rep_c22222;unigene_rep_c23597;unigene_rep_c26805;unigene_c1757;unigene_c20646;unigene_c415;unigene_c866	unigene_c2202;unigene_c4891;unigene_rep_c21555;unigene_rep_c21878;unigene_rep_c22222;unigene_rep_c23597;unigene_rep_c26805;unigene_rep_c34978;unigene_c1757;unigene_c20646;unigene_c415;unigene_c866	11	12
cellular_component	cell	unigene_c10085;unigene_c10211;unigene_c10367;unigene_c10917;unigene_c10926;unigene_c10946;unigene_c11025;unigene_c11179;unigene_c11335;unigene_c11462;unigene_c11487;unigene_c12012;unigene_c1206;unigene_c1263;unigene_c12843;unigene_c1291;unigene_c13387;unigene_c13406;unigene_c13723;unigene_c13920;unigene_c1403;unigene_c14147;unigene_c14611;unigene_c15122;unigene_c15341;unigene_c1550;unigene_c15855…		10741	10620
cellular_component	cell part	unigene_c10085;unigene_c10211;unigene_c10367;unigene_c10917;unigene_c10926;unigene_c10946;unigene_c11025;unigene_c11179;unigene_c11335;unigene_c11462;unigene_c11487;unigene_c12012;unigene_c1206;unigene_c1263;unigene_c12843;unigene_c1291;unigene_c13387;unigene_c13406;unigene_c13723;unigene_c13920;unigene_c1403;unigene_c14147;unigene_c14611;unigene_c15122;unigene_c15341;unigene_c1550;unigene_c15855…		9889	9794
cellular_component	extracellular region	unigene_c1287;unigene_c19890;unigene_c3860;unigene_c6068;unigene_c7398;unigene_rep_c23074;unigene_rep_c24158;unigene_rep_c31965;unigene_rep_c34194;unigene_rep_c35378;unigene_s35745;unigene_c572;unigene_c7337;unigene_c8473;unigene_rep_c21552;unigene_rep_c23477;unigene_rep_c25980;unigene_rep_c31565;unigene_rep_c35252;unigene_rep_c35352;unigene_s48979;unigene_s51150;unigene_c3150;unigene_c4571;unige…	unigene_c1287;unigene_c19890;unigene_c3860;unigene_c6068;unigene_c7398;unigene_rep_c23074;unigene_rep_c24158;unigene_rep_c31965;unigene_rep_c34194;unigene_rep_c35378;unigene_rep_c36257;unigene_s42821;unigene_c572;unigene_c7337;unigene_c8473;unigene_rep_c21552;unigene_rep_c23477;unigene_rep_c31565;unigene_rep_c35352;unigene_s43874;unigene_c16172;unigene_c3150;unigene_c4571;unigene_rep_c20943	25	24
cellular_component	extracellular region part	unigene_c572;unigene_c7337;unigene_c8473;unigene_rep_c21552;unigene_rep_c23477;unigene_rep_c25980;unigene_rep_c31565;unigene_rep_c35252;unigene_rep_c35352;unigene_s48979;unigene_s51150;unigene_c3150;unigene_c4571;unigene_rep_c20943	unigene_c572;unigene_c7337;unigene_c8473;unigene_rep_c21552;unigene_rep_c23477;unigene_rep_c31565;unigene_rep_c35352;unigene_s43874;unigene_c16172;unigene_c3150;unigene_c4571;unigene_rep_c20943	14	12
cellular_component	macromolecular complex	unigene_c10085;unigene_c10211;unigene_c10367;unigene_c10917;unigene_c10926;unigene_c10946;unigene_c11025;unigene_c11179;unigene_c11335;unigene_c11462;unigene_c11487;unigene_c12012;unigene_c1206;unigene_c1263;unigene_c12843;unigene_c1291;unigene_c13387;unigene_c13406;unigene_c13723;unigene_c13920;unigene_c1403;unigene_c14147;unigene_c14611;unigene_c15122;unigene_c15341;unigene_c1550;unigene_c15855…	unigene_c10085;unigene_c10211;unigene_c10367;unigene_c10946;unigene_c11025;unigene_c11179;unigene_c11335;unigene_c11487;unigene_c12012;unigene_c1206;unigene_c12538;unigene_c12542;unigene_c1263;unigene_c12843;unigene_c1291;unigene_c13387;unigene_c13406;unigene_c13723;unigene_c13920;unigene_c1403;unigene_c14383;unigene_c14448;unigene_c14611;unigene_c15341;unigene_c1550;unigene_c15855;unigene_c16209…	1593	1584
cellular_component	membrane-enclosed lumen	unigene_c162;unigene_c17681;unigene_c2782;unigene_c3139;unigene_c3153;unigene_c36;unigene_c4148;unigene_c4326;unigene_c4970;unigene_c5049;unigene_c5075;unigene_c5118;unigene_c5167;unigene_c7993;unigene_c86;unigene_c992;unigene_rep_c20910;unigene_rep_c22717;unigene_rep_c23145;unigene_rep_c24030;unigene_rep_c26206;unigene_rep_c27377;unigene_rep_c32119;unigene_rep_c33225;unigene_rep_c34196;unigene_r…	unigene_c14670;unigene_c162;unigene_c17681;unigene_c2782;unigene_c3139;unigene_c3153;unigene_c36;unigene_c4148;unigene_c4326;unigene_c4940;unigene_c4970;unigene_c5049;unigene_c5075;unigene_c5118;unigene_c5142;unigene_c5167;unigene_c7993;unigene_c86;unigene_c992;unigene_rep_c20910;unigene_rep_c22717;unigene_rep_c23145;unigene_rep_c24030;unigene_rep_c26206;unigene_rep_c27166;unigene_rep_c27671;unig…	446	446
cellular_component	organelle	unigene_c10300;unigene_c1049;unigene_c10963;unigene_c11471;unigene_c11530;unigene_c11961;unigene_c1377;unigene_c18017;unigene_c18744;unigene_c18745;unigene_c20153;unigene_c324;unigene_c3404;unigene_c3640;unigene_c3800;unigene_c3935;unigene_c4236;unigene_c4988;unigene_c5187;unigene_c5481;unigene_c5871;unigene_c8265;unigene_rep_c23106;unigene_rep_c24045;unigene_rep_c24742;unigene_rep_c27830;unigene…		7588	7493
cellular_component	organelle part	unigene_c10300;unigene_c1049;unigene_c10963;unigene_c11471;unigene_c11530;unigene_c11961;unigene_c1377;unigene_c18017;unigene_c18744;unigene_c18745;unigene_c20153;unigene_c324;unigene_c3404;unigene_c3640;unigene_c3800;unigene_c3935;unigene_c4236;unigene_c4988;unigene_c5187;unigene_c5481;unigene_c5871;unigene_c8265;unigene_rep_c23106;unigene_rep_c24045;unigene_rep_c24742;unigene_rep_c27830;unigene…		2244	2240
molecular_function	antioxidant activity	unigene_c10507;unigene_c1143;unigene_c14049;unigene_c14177;unigene_c18507;unigene_c4791;unigene_c885;unigene_rep_c20882;unigene_rep_c21097;unigene_rep_c21111;unigene_rep_c21412;unigene_rep_c22074;unigene_rep_c22969;unigene_rep_c23192;unigene_rep_c23365;unigene_rep_c23379;unigene_rep_c23587;unigene_rep_c23723;unigene_rep_c31689;unigene_rep_c31800;unigene_rep_c33117;unigene_rep_c33762;unigene_rep_c…	unigene_c10507;unigene_c1143;unigene_c14049;unigene_c14177;unigene_c4791;unigene_c885;unigene_rep_c20882;unigene_rep_c21097;unigene_rep_c21111;unigene_rep_c21412;unigene_rep_c22074;unigene_rep_c22969;unigene_rep_c23192;unigene_rep_c23365;unigene_rep_c23379;unigene_rep_c23587;unigene_rep_c23723;unigene_rep_c31689;unigene_rep_c31800;unigene_rep_c32603;unigene_rep_c33083;unigene_rep_c34528;unigene_r…	36	34
molecular_function	binding	unigene_c11005;unigene_c1170;unigene_c1330;unigene_c14157;unigene_c15128;unigene_c1594;unigene_c17350;unigene_c17565;unigene_c19480;unigene_c19484;unigene_c1964;unigene_c20833;unigene_c24;unigene_c2432;unigene_c310;unigene_c3312;unigene_c3605;unigene_c4618;unigene_c4834;unigene_c5026;unigene_c7;unigene_c8012;unigene_c9265;unigene_c976;unigene_rep_c20878;unigene_rep_c21187;unigene_rep_c22460;unige…		6571	6505
molecular_function	catalytic activity	unigene_rep_c21118;unigene_rep_c31813;unigene_rep_c35103;unigene_c13138;unigene_c20378;unigene_c795;unigene_c10498;unigene_c1035;unigene_c10536;unigene_c10848;unigene_c1924;unigene_c19490;unigene_c2072;unigene_c2612;unigene_c2892;unigene_c34823;unigene_c3764;unigene_c5084;unigene_c887;unigene_rep_c20865;unigene_rep_c20926;unigene_rep_c21803;unigene_rep_c22558;unigene_rep_c31008;unigene_rep_c31501…		8542	8508
molecular_function	enzyme regulator activity	unigene_c8850;unigene_rep_c21204;unigene_rep_c21711;unigene_s50289;unigene_c17555;unigene_c2340;unigene_c4305;unigene_c4834;unigene_c8012;unigene_c8910;unigene_rep_c27672;unigene_rep_c32716;unigene_rep_c22246;unigene_rep_c22567;unigene_rep_c32171;unigene_rep_c35113;unigene_rep_c37491;unigene_rep_c37518;unigene_rep_c37520;unigene_s50007;unigene_c4411;unigene_c19515;unigene_c3286;unigene_c4230;unig…	unigene_c7604;unigene_c8850;unigene_rep_c21204;unigene_rep_c21711;unigene_s42918;unigene_s45233;unigene_c17555;unigene_c2340;unigene_c27066;unigene_c4305;unigene_c4834;unigene_c8012;unigene_c8910;unigene_rep_c27672;unigene_rep_c22246;unigene_rep_c22567;unigene_rep_c32171;unigene_rep_c35113;unigene_rep_c37491;unigene_rep_c37520;unigene_c4411;unigene_c19515;unigene_c3286;unigene_c4230;unigene_rep_c…	163	158
molecular_function	molecular transducer activity	unigene_c106;unigene_c11125;unigene_c1517;unigene_c17180;unigene_c17386;unigene_c3088;unigene_c333;unigene_c9958;unigene_rep_c20933;unigene_rep_c21152;unigene_rep_c21404;unigene_rep_c28241;unigene_rep_c29796;unigene_rep_c31780;unigene_c4949;unigene_c13530;unigene_c2841;unigene_c3055;unigene_c8574;unigene_rep_c24934;unigene_c10157;unigene_c10304;unigene_c10369;unigene_c10370;unigene_c10397;unigene…	unigene_c106;unigene_c11125;unigene_c14472;unigene_c1517;unigene_c17180;unigene_c3088;unigene_c333;unigene_rep_c20933;unigene_rep_c21152;unigene_rep_c21404;unigene_rep_c31780;unigene_s41007;unigene_c4949;unigene_c2841;unigene_c3055;unigene_c8574;unigene_rep_c24934;unigene_c10157;unigene_c10304;unigene_c10305;unigene_c10369;unigene_c10370;unigene_c10397;unigene_c10525;unigene_c1080;unigene_c1095;u…	356	335
molecular_function	protein binding transcription factor activity	unigene_c12360;unigene_c12922;unigene_c1631;unigene_c20691;unigene_c3203;unigene_c5860;unigene_c659;unigene_c7660;unigene_c8833;unigene_c8971;unigene_rep_c21509;unigene_rep_c24382;unigene_rep_c24387;unigene_rep_c32113;unigene_rep_c33406;unigene_rep_c34736;unigene_c12818;unigene_c14175;unigene_c1453;unigene_c1528;unigene_c3892;unigene_rep_c20988;unigene_rep_c21723;unigene_rep_c22866;unigene_rep_c2…	unigene_c10474;unigene_c12360;unigene_c12922;unigene_c15878;unigene_c1631;unigene_c20691;unigene_c3203;unigene_c5860;unigene_c659;unigene_c7660;unigene_c8833;unigene_c8971;unigene_rep_c21509;unigene_rep_c24382;unigene_rep_c24387;unigene_rep_c25495;unigene_rep_c26195;unigene_rep_c27666;unigene_rep_c32113;unigene_rep_c33406;unigene_rep_c34736;unigene_c12818;unigene_c14175;unigene_c1453;unigene_rep_…	31	35
molecular_function	transcription regulator activity	unigene_c1006;unigene_c16982;unigene_c1702;unigene_c17183;unigene_c3522;unigene_c3663;unigene_c7168;unigene_c9530;unigene_rep_c22805;unigene_rep_c23219;unigene_c13875;unigene_c19315;unigene_c20665;unigene_c2568;unigene_rep_c22110;unigene_rep_c21962;unigene_rep_c33507;unigene_c3520;unigene_rep_c21230;unigene_c1527;unigene_c18169;unigene_c3768;unigene_c3814;unigene_c5150;unigene_c6037;unigene_c758;…	unigene_c1006;unigene_c10298;unigene_c16982;unigene_c1702;unigene_c17183;unigene_c3522;unigene_c3663;unigene_c7168;unigene_c9530;unigene_rep_c22805;unigene_rep_c23219;unigene_rep_c29330;unigene_rep_c33678;unigene_c19315;unigene_c20665;unigene_c2568;unigene_rep_c22110;unigene_rep_c26716;unigene_rep_c21962;unigene_rep_c33507;unigene_c3520;unigene_rep_c21230;unigene_c1527;unigene_c16104;unigene_c181…	28	32
molecular_function	translation regulator activity	unigene_c3076;unigene_rep_c25275	unigene_c3076;unigene_rep_c25275	2	2
molecular_function	transporter activity	unigene_c1961;unigene_c10922;unigene_c14087;unigene_c18975;unigene_c1948;unigene_c3272;unigene_c3295;unigene_c5112;unigene_c5311;unigene_rep_c32890;unigene_c1376;unigene_rep_c27784;unigene_c16747;unigene_c6282;unigene_rep_c21898;unigene_rep_c23185;unigene_rep_c23480;unigene_rep_c33403;unigene_c1102;unigene_c14001;unigene_c17576;unigene_c18371;unigene_c25675;unigene_c26819;unigene_c3714;unigene_c5…	unigene_c16075;unigene_c1961;unigene_c10922;unigene_c14087;unigene_c18975;unigene_c1948;unigene_c3272;unigene_c3295;unigene_c5112;unigene_c5311;unigene_c9230;unigene_rep_c32890;unigene_c1376;unigene_rep_c27784;unigene_c16747;unigene_c6282;unigene_rep_c21898;unigene_rep_c23185;unigene_rep_c23480;unigene_c1102;unigene_c14001;unigene_c17576;unigene_c26819;unigene_c3714;unigene_c5048;unigene_c626;uni…	854	850

## Sheet: Table S2
Table S2 Gene annotation of safflower DEGs
Unigenes	KOG ID	Function description	KOG abbrev	KOG classification
unigene_c1	KOG4151	Myosin assembly protein/sexual cycle protein and related proteins	ODR	Posttranslational modification, protein turnover, chaperones ; Cell cycle control, cell division, chromosome partitioning ; General function prediction only ;
unigene_c2	KOG0985	Vesicle coat protein clathrin, heavy chain	U	Intracellular trafficking, secretion, and vesicular transport ;
unigene_c4	KOG2526	Predicted aminopeptidases - M20/M25/M40 family	E	Amino acid transport and metabolism ;
unigene_c5	KOG2103	Uncharacterized conserved protein	S	Function unknown ;
unigene_c6	KOG1153	Subtilisin-related protease/Vacuolar protease B	O	Posttranslational modification, protein turnover, chaperones ;
unigene_c7	KOG2417	Predicted G-protein coupled receptor	T	Signal transduction mechanisms ;
unigene_c8	KOG1021	Acetylglucosaminyltransferase EXT1/exostosin 1	GMW	Carbohydrate transport and metabolism ; Cell wall/membrane/envelope biogenesis ; Extracellular structures ;
unigene_c9	KOG1378	Purple acid phosphatase	G	Carbohydrate transport and metabolism ;
unigene_c10	KOG2237	Predicted serine protease	O	Posttranslational modification, protein turnover, chaperones ;
unigene_c12	KOG0214	RNA polymerase II, second largest subunit	K	Transcription ;
unigene_c13	KOG0595	Serine/threonine-protein kinase involved in autophagy	OUT	Posttranslational modification, protein turnover, chaperones ; Intracellular trafficking, secretion, and vesicular transport ; Signal transduction mechanisms ;
unigene_c14	KOG1237	H+/oligopeptide symporter	E	Amino acid transport and metabolism ;
unigene_c15	KOG4843	Uncharacterized conserved protein	S	Function unknown ;
unigene_c16	KOG0229	Phosphatidylinositol-4-phosphate 5-kinase	T	Signal transduction mechanisms ;
unigene_c17	KOG1021	Acetylglucosaminyltransferase EXT1/exostosin 1	GMW	Carbohydrate transport and metabolism ; Cell wall/membrane/envelope biogenesis ; Extracellular structures ;
unigene_c19	KOG0434	Isoleucyl-tRNA synthetase	J	Translation, ribosomal structure and biogenesis ;
unigene_c20	KOG0323	TFIIF-interacting CTD phosphatases, including NLI-interacting factor	K	Transcription ;
unigene_c21	KOG0167	FOG: Armadillo/beta-catenin-like repeats	S	Function unknown ;
unigene_c22	KOG0266	WD40 repeat-containing protein	R	General function prediction only ;
unigene_c23	KOG1187	Serine/threonine protein kinase	T	Signal transduction mechanisms ;
unigene_c24	KOG2166	Cullins	D	Cell cycle control, cell division, chromosome partitioning ;
unigene_c26	KOG1190	Polypyrimidine tract-binding protein	A	RNA processing and modification ;
unigene_c27	KOG0239	Kinesin (KAR3 subfamily)	Z	Cytoskeleton ;
unigene_c28	KOG2016	NEDD8-activating complex, APP-BP1/UBA5 component	O	Posttranslational modification, protein turnover, chaperones ;
unigene_c29	KOG4568	Cytoskeleton-associated protein and related proteins	ZR	Cytoskeleton ; General function prediction only ;
unigene_c30	KOG1258	mRNA processing protein	A	RNA processing and modification ;
unigene_c31	KOG0437	Leucyl-tRNA synthetase	J	Translation, ribosomal structure and biogenesis ;
unigene_c32	KOG2163	Centromere/kinetochore protein zw10 involved in mitotic chromosome segregation	D	Cell cycle control, cell division, chromosome partitioning ;
unigene_c34	KOG4660	Protein Mei2, essential for commitment to meiosis, and related proteins	D	Cell cycle control, cell division, chromosome partitioning ;
unigene_c35	KOG2646	Ribosomal protein S5	J	Translation, ribosomal structure and biogenesis ;
unigene_c36	KOG0379	Kelch repeat-containing proteins	R	General function prediction only ;
unigene_c37	KOG4658	Apoptotic ATPase	T	Signal transduction mechanisms ;
unigene_c38	KOG2598	Phosphomethylpyrimidine kinase	HK	Coenzyme transport and metabolism ; Transcription ;
unigene_c39	KOG1948	Metalloproteinase-related collagenase pM5	O	Posttranslational modification, protein turnover, chaperones ;
unigene_c40	KOG2460	Signal recognition particle, subunit Srp68	U	Intracellular trafficking, secretion, and vesicular transport ;
unigene_c41	KOG1865	Ubiquitin carboxyl-terminal hydrolase	O	Posttranslational modification, protein turnover, chaperones ;
unigene_c42	KOG0403	Neoplastic transformation suppressor Pdcd4/MA-3, contains MA3 domain	T	Signal transduction mechanisms ;
unigene_c43	KOG1488	Translational repressor Pumilio/PUF3 and related RNA-binding proteins (Puf superfamily)	J	Translation, ribosomal structure and biogenesis ;
unigene_c44	KOG1066	Glucosidase II catalytic (alpha) subunit and related enzymes, glycosyl hydrolase family 31	GMO	Carbohydrate transport and metabolism ; Cell wall/membrane/envelope biogenesis ; Posttranslational modification, protein turnover, chaperones ;
unigene_c45	KOG2467	Glycine/serine hydroxymethyltransferase	E	Amino acid transport and metabolism ;
unigene_c46	KOG1525	Sister chromatid cohesion complex Cohesin, subunit PDS5	D	Cell cycle control, cell division, chromosome partitioning ;
unigene_c48	KOG1134	Uncharacterized conserved protein	R	General function prediction only ;
unigene_c49	KOG2386	mRNA capping enzyme, guanylyltransferase (alpha) subunit	A	RNA processing and modification ;
unigene_c50	KOG1488	Translational repressor Pumilio/PUF3 and related RNA-binding proteins (Puf superfamily)	J	Translation, ribosomal structure and biogenesis ;
unigene_c51	KOG2615	Permease of the major facilitator superfamily	R	General function prediction only ;
unigene_c52	KOG0060	Long-chain acyl-CoA transporter, ABC superfamily (involved in peroxisome organization and biogenesis)	IR	Lipid transport and metabolism ; General function prediction only ;
unigene_c53	KOG1677	CCCH-type Zn-finger protein	R	General function prediction only ;
unigene_c54	KOG1046	Puromycin-sensitive aminopeptidase and related aminopeptidases	EO	Amino acid transport and metabolism ; Posttranslational modification, protein turnover, chaperones ;
unigene_c56	KOG1101	Apoptosis inhibitor IAP1 and related BIR domain proteins	DR	Cell cycle control, cell division, chromosome partitioning ; General function prediction only ;
unigene_c57	KOG0254	Predicted transporter (major facilitator superfamily)	R	General function prediction only ;
unigene_c58	KOG1072	FOG: Kelch repeat	R	General function prediction only ;
unigene_c61	KOG2047	mRNA splicing factor	A	RNA processing and modification ;
unigene_c62	KOG2798	Putative trehalase	G	Carbohydrate transport and metabolism ;
unigene_c63	KOG2262	Sexual differentiation process protein ISP4	T	Signal transduction mechanisms ;
unigene_c64	KOG1220	Phosphoglucomutase/phosphomannomutase	G	Carbohydrate transport and metabolism ;
unigene_c65	KOG1187	Serine/threonine protein kinase	T	Signal transduction mechanisms ;
unigene_c66	KOG0963	Transcription factor/CCAAT displacement protein CDP1	K	Transcription ;
unigene_c67	KOG0161	Myosin class II heavy chain	Z	Cytoskeleton ;
unigene_c68	KOG2375	Protein interacting with poly(A)-binding protein	A	RNA processing and modification ;
unigene_c69	KOG0042	Glycerol-3-phosphate dehydrogenase	C	Energy production and conversion ;
unigene_c70	KOG0450	2-oxoglutarate dehydrogenase, E1 subunit	G	Carbohydrate transport and metabolism ;
unigene_c71	KOG1231	Proteins containing the FAD binding domain	C	Energy production and conversion ;
unigene_c72	KOG0483	Transcription factor HEX, contains HOX and HALZ domains	K	Transcription ;
unigene_c73	KOG1441	Glucose-6-phosphate/phosphate and phosphoenolpyruvate/phosphate antiporter	GE	Carbohydrate transport and metabolism ; Amino acid transport and metabolism ;
unigene_c74	KOG3968	Atrazine chlorohydrolase/guanine deaminase	FQ	Nucleotide transport and metabolism ; Secondary metabolites biosynthesis, transport and catabolism ;
unigene_c75	KOG2939	Uncharacterized conserved protein	S	Function unknown ;
unigene_c76	KOG2048	WD40 repeat protein	R	General function prediction only ;
unigene_c77	KOG0504	FOG: Ankyrin repeat	R	General function prediction only ;
unigene_c79	KOG1707	Predicted Ras related/Rac-GTP binding protein	V	Defense mechanisms ;
unigene_c83	KOG0401	Translation initiation factor 4F, ribosome/mRNA-bridging subunit (eIF-4G)	J	Translation, ribosomal structure and biogenesis ;
unigene_c85	KOG1187	Serine/threonine protein kinase	T	Signal transduction mechanisms ;
unigene_c86	KOG0701	dsRNA-specific nuclease Dicer and related ribonucleases	A	RNA processing and modification ;
unigene_c87	KOG1050	Trehalose-6-phosphate synthase component TPS1 and related subunits	G	Carbohydrate transport and metabolism ;
unigene_c88	KOG0845	Nuclear pore complex, Nup98 component (sc Nup145/Nup100/Nup116)	YU	Nuclear structure ; Intracellular trafficking, secretion, and vesicular transport ;
unigene_c89	KOG1706	Argininosuccinate synthase	E	Amino acid transport and metabolism ;
unigene_c90	KOG0498	K+-channel ERG and related proteins, contain PAS/PAC sensor domain	PT	Inorganic ion transport and metabolism ; Signal transduction mechanisms ;
unigene_c91	KOG4162	Predicted calmodulin-binding protein	T	Signal transduction mechanisms ;
unigene_c94	KOG0206	P-type ATPase	R	General function prediction only ;
unigene_c95	KOG1271	Methyltransferases	R	General function prediction only ;
unigene_c96	KOG0946	ER-Golgi vesicle-tethering protein p115	U	Intracellular trafficking, secretion, and vesicular transport ;
unigene_c97	KOG0167	FOG: Armadillo/beta-catenin-like repeats	S	Function unknown ;
unigene_c98	KOG2881	Predicted membrane protein	S	Function unknown ;
unigene_c99	KOG0157	Cytochrome P450 CYP4/CYP19/CYP26 subfamilies	QI	Secondary metabolites biosynthesis, transport and catabolism ; Lipid transport and metabolism ;
unigene_c100	KOG2004	Mitochondrial ATP-dependent protease PIM1/LON	O	Posttranslational modification, protein turnover, chaperones ;
unigene_c101	KOG0927	Predicted transporter (ABC superfamily)	R	General function prediction only ;
unigene_c102	KOG2649	Zinc carboxypeptidase	R	General function prediction only ;
unigene_c103	KOG0302	Ribosome Assembly protein	R	General function prediction only ;
unigene_c104	KOG4660	Protein Mei2, essential for commitment to meiosis, and related proteins	D	Cell cycle control, cell division, chromosome partitioning ;
unigene_c105	KOG1180	Acyl-CoA synthetase	I	Lipid transport and metabolism ;
unigene_c106	KOG1187	Serine/threonine protein kinase	T	Signal transduction mechanisms ;
unigene_c107	KOG2431	1, 2-alpha-mannosidase	G	Carbohydrate transport and metabolism ;
unigene_c108	KOG2034	Vacuolar sorting protein PEP3/VPS18	U	Intracellular trafficking, secretion, and vesicular transport ;
unigene_c109	KOG1221	Acyl-CoA reductase	I	Lipid transport and metabolism ;
unigene_c110	KOG2893	Zn finger protein	R	General function prediction only ;
unigene_c111	KOG0156	Cytochrome P450 CYP2 subfamily	Q	Secondary metabolites biosynthesis, transport and catabolism ;
unigene_c112	KOG3569	RAS signaling inhibitor ST5	T	Signal transduction mechanisms ;
unigene_c113	KOG0276	Vesicle coat complex COPI, beta' subunit	U	Intracellular trafficking, secretion, and vesicular transport ;
unigene_c114	KOG2479	Translation initiation factor 3, subunit d (eIF-3d)	J	Translation, ribosomal structure and biogenesis ;
unigene_c115	KOG1058	Vesicle coat complex COPI, beta subunit	U	Intracellular trafficking, secretion, and vesicular transport ;
unigene_c117	KOG0167	FOG: Armadillo/beta-catenin-like repeats	S	Function unknown ;
unigene_c118	KOG0951	RNA helicase BRR2, DEAD-box superfamily	A	RNA processing and modification ;
unigene_c119	KOG0955	PHD finger protein BR140/LIN-49	R	General function prediction only ;
unigene_c120	KOG0619	FOG: Leucine rich repeat	R	General function prediction only ;
unigene_c121	KOG1232	Proteins containing the FAD binding domain	C	Energy production and conversion ;
unigene_c122	KOG2287	Galactosyltransferases	G	Carbohydrate transport and metabolism ;
unigene_c123	KOG0456	Aspartate kinase	E	Amino acid transport and metabolism ;
unigene_c124	KOG2287	Galactosyltransferases	G	Carbohydrate transport and metabolism ;
unigene_c125	KOG0113	U1 small nuclear ribonucleoprotein (RRM superfamily)	A	RNA processing and modification ;
unigene_c126	KOG0626	Beta-glucosidase, lactase phlorizinhydrolase, and related proteins	G	Carbohydrate transport and metabolism ;
unigene_c127	KOG2020	Nuclear transport receptor CRM1/MSN5 (importin beta superfamily)	YU	Nuclear structure ; Intracellular trafficking, secretion, and vesicular transport ;
unigene_c128	KOG0702	Predicted GTPase-activating protein	T	Signal transduction mechanisms ;
unigene_c131	KOG0198	MEKK and related serine/threonine protein kinases	T	Signal transduction mechanisms ;
unigene_c132	KOG4748	Subunit of Golgi mannosyltransferase complex	GM	Carbohydrate transport and metabolism ; Cell wall/membrane/envelope biogenesis ;
unigene_c133	KOG0724	Zuotin and related molecular chaperones (DnaJ superfamily), contains DNA-binding domains	O	Posttranslational modification, protein turnover, chaperones ;
unigene_c137	KOG0752	Mitochondrial solute carrier protein	C	Energy production and conversion ;
unigene_c138	KOG3199	Nicotinamide mononucleotide adenylyl transferase	H	Coenzyme transport and metabolism ;
unigene_c139	KOG0116	RasGAP SH3 binding protein rasputin, contains NTF2 and RRM domains	T	Signal transduction mechanisms ;
unigene_c140	KOG0543	FKBP-type peptidyl-prolyl cis-trans isomerase	O	Posttranslational modification, protein turnover, chaperones ;
unigene_c141	KOG2306	Uncharacterized conserved protein	S	Function unknown ;
unigene_c142	KOG2366	Alpha-D-galactosidase (melibiase)	G	Carbohydrate transport and metabolism ;
unigene_c143	KOG2225	Proteins containing regions of low-complexity	R	General function prediction only ;
unigene_c144	KOG0167	FOG: Armadillo/beta-catenin-like repeats	S	Function unknown ;
unigene_c146	KOG0840	ATP-dependent Clp protease, proteolytic subunit	O	Posttranslational modification, protein turnover, chaperones ;
unigene_c148	KOG3020	TatD-related DNase	L	Replication, recombination and repair ;
unigene_c150	KOG2735	Phosphatidylserine synthase	I	Lipid transport and metabolism ;
unigene_c151	KOG1293	Proteins containing armadillo/beta-catenin-like repeat	R	General function prediction only ;
unigene_c152	KOG4203	Armadillo/beta-Catenin/plakoglobin	TZ	Signal transduction mechanisms ; Cytoskeleton ;
unigene_c154	KOG2861	Uncharacterized conserved protein	S	Function unknown ;
unigene_c155	KOG0698	Serine/threonine protein phosphatase	T	Signal transduction mechanisms ;
unigene_c156	KOG1187	Serine/threonine protein kinase	T	Signal transduction mechanisms ;
unigene_c157	KOG1181	FOG: Low-complexity	S	Function unknown ;
unigene_c158	KOG1203	Predicted dehydrogenase	G	Carbohydrate transport and metabolism ;
unigene_c160	KOG1302	Vacuolar sorting protein VPS33/slp1 (Sec1 family)	U	Intracellular trafficking, secretion, and vesicular transport ;
unigene_c161	KOG1501	Arginine N-methyltransferase	R	General function prediction only ;
unigene_c162	KOG1041	Translation initiation factor 2C (eIF-2C) and related proteins	J	Translation, ribosomal structure and biogenesis ;
unigene_c163	KOG3974	Predicted sugar kinase	G	Carbohydrate transport and metabolism ;
unigene_c164	KOG0497	Oxidosqualene-lanosterol cyclase and related proteins	I	Lipid transport and metabolism ;
unigene_c165	KOG3202	SNARE protein TLG1/Syntaxin 6	U	Intracellular trafficking, secretion, and vesicular transport ;
unigene_c166	KOG0266	WD40 repeat-containing protein	R	General function prediction only ;
unigene_c167	KOG1339	Aspartyl protease	O	Posttranslational modification, protein turnover, chaperones ;
unigene_c168	KOG2604	Subunit of cis-Golgi transport vesicle tethering complex - Sec34p	U	Intracellular trafficking, secretion, and vesicular transport ;
unigene_c169	KOG2855	Ribokinase	G	Carbohydrate transport and metabolism ;
unigene_c170	KOG1235	Predicted unusual protein kinase	R	General function prediction only ;
unigene_c171	KOG1604	Predicted mutarotase	G	Carbohydrate transport and metabolism ;
unigene_c173	KOG0254	Predicted transporter (major facilitator superfamily)	R	General function prediction only ;
unigene_c174	KOG1426	FOG: RCC1 domain	S	Function unknown ;
unigene_c176	KOG0520	Uncharacterized conserved protein, contains IPT/TIG domain	S	Function unknown ;
unigene_c177	KOG2169	Zn-finger transcription factor	K	Transcription ;
unigene_c178	KOG1397	Ca2+/H+ antiporter VCX1 and related proteins	P	Inorganic ion transport and metabolism ;
unigene_c179	KOG1238	Glucose dehydrogenase/choline dehydrogenase/mandelonitrile lyase (GMC oxidoreductase family)	R	General function prediction only ;
unigene_c180	KOG4177	Ankyrin	M	Cell wall/membrane/envelope biogenesis ;
unigene_c181	KOG0156	Cytochrome P450 CYP2 subfamily	Q	Secondary metabolites biosynthesis, transport and catabolism ;
unigene_c182	KOG0523	Transketolase	G	Carbohydrate transport and metabolism ;
unigene_c183	KOG2495	NADH-dehydrogenase (ubiquinone)	C	Energy production and conversion ;
unigene_c185	KOG1187	Serine/threonine protein kinase	T	Signal transduction mechanisms ;
unigene_c186	KOG1291	Mn2+ and Fe2+ transporters of the NRAMP family	P	Inorganic ion transport and metabolism ;
unigene_c187	KOG1474	Transcription initiation factor TFIID, subunit BDF1 and related bromodomain proteins	K	Transcription ;
unigene_c188	KOG0619	FOG: Leucine rich repeat	R	General function prediction only ;
unigene_c189	KOG0059	Lipid exporter ABCA1 and related proteins, ABC superfamily	IR	Lipid transport and metabolism ; General function prediction only ;
unigene_c190	KOG1236	Predicted unusual protein kinase	R	General function prediction only ;
unigene_c191	KOG0401	Translation initiation factor 4F, ribosome/mRNA-bridging subunit (eIF-4G)	J	Translation, ribosomal structure and biogenesis ;
unigene_c192	KOG2823	Cellular protein (glioma tumor suppressor candidate region gene 2)	R	General function prediction only ;
unigene_c193	KOG1840	Kinesin light chain	Z	Cytoskeleton ;
unigene_c194	KOG0242	Kinesin-like protein	Z	Cytoskeleton ;
unigene_c195	KOG0666	Cyclin C-dependent kinase CDK8	K	Transcription ;
unigene_c197	KOG0039	Ferric reductase, NADH/NADPH oxidase and related proteins	PQ	Inorganic ion transport and metabolism ; Secondary metabolites biosynthesis, transport and catabolism ;
unigene_c198	KOG1187	Serine/threonine protein kinase	T	Signal transduction mechanisms ;
unigene_c199	KOG0432	Valyl-tRNA synthetase	J	Translation, ribosomal structure and biogenesis ;
unigene_c200	KOG1863	Ubiquitin carboxyl-terminal hydrolase	O	Posttranslational modification, protein turnover, chaperones ;
unigene_c201	KOG2607	CDK5 activator-binding protein	T	Signal transduction mechanisms ;
unigene_c203	KOG0204	Calcium transporting ATPase	P	Inorganic ion transport and metabolism ;
unigene_c204	KOG1051	Chaperone HSP104 and related ATP-dependent Clp proteases	O	Posttranslational modification, protein turnover, chaperones ;
unigene_c206	KOG0054	Multidrug resistance-associated protein/mitoxantrone resistance protein, ABC superfamily	Q	Secondary metabolites biosynthesis, transport and catabolism ;
unigene_c207	KOG0157	Cytochrome P450 CYP4/CYP19/CYP26 subfamilies	QI	Secondary metabolites biosynthesis, transport and catabolism ; Lipid transport and metabolism ;
unigene_c208	KOG3544	Collagens (type IV and type XIII), and related proteins	W	Extracellular structures ;
unigene_c210	KOG1353	F0F1-type ATP synthase, alpha subunit	C	Energy production and conversion ;
unigene_c211	KOG0116	RasGAP SH3 binding protein rasputin, contains NTF2 and RRM domains	T	Signal transduction mechanisms ;
unigene_c212	KOG2250	Glutamate/leucine/phenylalanine/valine dehydrogenases	E	Amino acid transport and metabolism ;
unigene_c213	KOG3270	Uncharacterized conserved protein	S	Function unknown ;
unigene_c215	KOG0117	Heterogeneous nuclear ribonucleoprotein R (RRM superfamily)	A	RNA processing and modification ;
unigene_c216	KOG4282	Transcription factor GT-2 and related proteins, contains trihelix DNA-binding/SANT domain	K	Transcription ;
unigene_c217	KOG2013	SMT3/SUMO-activating complex, catalytic component UBA2	O	Posttranslational modification, protein turnover, chaperones ;
unigene_c218	KOG2062	26S proteasome regulatory complex, subunit RPN2/PSMD1	O	Posttranslational modification, protein turnover, chaperones ;
unigene_c219	KOG0198	MEKK and related serine/threonine protein kinases	T	Signal transduction mechanisms ;
unigene_c222	KOG4313	Thiamine pyrophosphokinase	F	Nucleotide transport and metabolism ;
unigene_c224	KOG0916	1,3-beta-glucan synthase/callose synthase catalytic subunit	M	Cell wall/membrane/envelope biogenesis ;
unigene_c225	KOG1187	Serine/threonine protein kinase	T	Signal transduction mechanisms ;
unigene_c226	KOG4658	Apoptotic ATPase	T	Signal transduction mechanisms ;
unigene_c227	KOG0408	Mitochondrial/chloroplast ribosomal protein S11	J	Translation, ribosomal structure and biogenesis ;
unigene_c228	KOG1322	GDP-mannose pyrophosphorylase/mannose-1-phosphate guanylyltransferase	M	Cell wall/membrane/envelope biogenesis ;
unigene_c229	KOG1032	Uncharacterized conserved protein, contains GRAM domain	S	Function unknown ;
unigene_c230	KOG1180	Acyl-CoA synthetase	I	Lipid transport and metabolism ;
unigene_c231	KOG3266	Predicted glycine cleavage system H protein	E	Amino acid transport and metabolism ;
unigene_c232	KOG2197	Ypt/Rab-specific GTPase-activating protein GYP7 and related proteins	T	Signal transduction mechanisms ;
unigene_c233	KOG0737	AAA+-type ATPase	O	Posttranslational modification, protein turnover, chaperones ;
unigene_c235	KOG2717	Uncharacterized conserved protein with similarity to embryogenesis protein H beta 58 and VPS26	R	General function prediction only ;
unigene_c236	KOG0409	Predicted dehydrogenase	R	General function prediction only ;
unigene_c237	KOG1268	Glucosamine 6-phosphate synthetases, contain amidotransferase and phosphosugar isomerase domains	M	Cell wall/membrane/envelope biogenesis ;
unigene_c238	KOG2293	Daxx-interacting protein MSP58/p78, contains FHA domain	KT	Transcription ; Signal transduction mechanisms ;
unigene_c239	KOG2040	Glycine dehydrogenase (decarboxylating)	E	Amino acid transport and metabolism ;
unigene_c241	KOG0483	Transcription factor HEX, contains HOX and HALZ domains	K	Transcription ;
unigene_c243	KOG1623	Multitransmembrane protein	R	General function prediction only ;
unigene_c245	KOG1764	5'-AMP-activated protein kinase, gamma subunit	C	Energy production and conversion ;
unigene_c246	KOG0283	WD40 repeat-containing protein	S	Function unknown ;
unigene_c247	KOG1684	Enoyl-CoA hydratase	I	Lipid transport and metabolism ;
unigene_c248	KOG0834	CDK9 kinase-activating protein cyclin T	D	Cell cycle control, cell division, chromosome partitioning ;
unigene_c249	KOG0916	1,3-beta-glucan synthase/callose synthase catalytic subunit	M	Cell wall/membrane/envelope biogenesis ;
unigene_c250	KOG0296	Angio-associated migratory cell protein (contains WD40 repeats)	S	Function unknown ;
unigene_c252	KOG0054	Multidrug resistance-associated protein/mitoxantrone resistance protein, ABC superfamily	Q	Secondary metabolites biosynthesis, transport and catabolism ;
unigene_c253	KOG2069	Golgi transport complex subunit	U	Intracellular trafficking, secretion, and vesicular transport ;
unigene_c255	KOG1897	Damage-specific DNA binding complex, subunit DDB1	L	Replication, recombination and repair ;
unigene_c256	KOG0911	Glutaredoxin-related protein	O	Posttranslational modification, protein turnover, chaperones ;
unigene_c257	KOG1965	Sodium/hydrogen exchanger protein	P	Inorganic ion transport and metabolism ;
unigene_c258	KOG1999	RNA polymerase II transcription elongation factor DSIF/SUPT5H/SPT5	K	Transcription ;
unigene_c259	KOG2253	U1 snRNP complex, subunit SNU71 and related PWI-motif proteins	A	RNA processing and modification ;
unigene_c261	KOG4130	Prenyl protein protease	O	Posttranslational modification, protein turnover, chaperones ;
unigene_c262	KOG1474	Transcription initiation factor TFIID, subunit BDF1 and related bromodomain proteins	K	Transcription ;
unigene_c263	KOG2009	Transcription initiation factor TFIIIB, Bdp1 subunit	K	Transcription ;
unigene_c264	KOG0011	Nucleotide excision repair factor NEF2, RAD23 component	L	Replication, recombination and repair ;
unigene_c265	KOG0700	Protein phosphatase 2C/pyruvate dehydrogenase (lipoamide) phosphatase	T	Signal transduction mechanisms ;
unigene_c269	KOG0742	AAA+-type ATPase	O	Posttranslational modification, protein turnover, chaperones ;
unigene_c270	KOG0800	FOG: Predicted E3 ubiquitin ligase	O	Posttranslational modification, protein turnover, chaperones ;
unigene_c271	KOG2390	Uncharacterized conserved protein	S	Function unknown ;
unigene_c272	KOG2102	Exosomal 3'-5' exoribonuclease complex, subunit Rrp44/Dis3	J	Translation, ribosomal structure and biogenesis ;
unigene_c273	KOG1211	Amidases	J	Translation, ribosomal structure and biogenesis ;
unigene_c274	KOG1050	Trehalose-6-phosphate synthase component TPS1 and related subunits	G	Carbohydrate transport and metabolism ;
unigene_c275	KOG1032	Uncharacterized conserved protein, contains GRAM domain	S	Function unknown ;
unigene_c276	KOG0266	WD40 repeat-containing protein	R	General function prediction only ;
unigene_c277	KOG2863	RNA lariat debranching enzyme	A	RNA processing and modification ;
unigene_c278	KOG3561	Aryl-hydrocarbon receptor nuclear translocator	K	Transcription ;
unigene_c279	KOG1845	MORC family ATPases	D	Cell cycle control, cell division, chromosome partitioning ;
unigene_c281	KOG1549	Cysteine desulfurase NFS1	E	Amino acid transport and metabolism ;
unigene_c282	KOG0331	ATP-dependent RNA helicase	A	RNA processing and modification ;
unigene_c283	KOG0691	Molecular chaperone (DnaJ superfamily)	O	Posttranslational modification, protein turnover, chaperones ;
unigene_c284	KOG1490	GTP-binding protein CRFG/NOG1 (ODN superfamily)	R	General function prediction only ;
unigene_c285	KOG1525	Sister chromatid cohesion complex Cohesin, subunit PDS5	D	Cell cycle control, cell division, chromosome partitioning ;
unigene_c289	KOG0036	Predicted mitochondrial carrier protein	F	Nucleotide transport and metabolism ;
unigene_c290	KOG0239	Kinesin (KAR3 subfamily)	Z	Cytoskeleton ;
unigene_c291	KOG0048	Transcription factor, Myb superfamily	K	Transcription ;
unigene_c293	KOG1518	Coproporphyrinogen III oxidase CPO/HEM13	H	Coenzyme transport and metabolism ;
unigene_c295	KOG0017	FOG: Transposon-encoded proteins with TYA, reverse transcriptase, integrase domains in various combinations	R	General function prediction only ;
unigene_c296	KOG1003	Actin filament-coating protein tropomyosin	Z	Cytoskeleton ;
unigene_c297	KOG2291	Oligosaccharyltransferase, alpha subunit (ribophorin I)	O	Posttranslational modification, protein turnover, chaperones ;
unigene_c299	KOG0014	MADS box transcription factor	K	Transcription ;
unigene_c300	KOG1148	Glutaminyl-tRNA synthetase	J	Translation, ribosomal structure and biogenesis ;
unigene_c301	KOG1889	Putative phosphoinositide phosphatase	I	Lipid transport and metabolism ;
unigene_c303	KOG3104	Mod5 protein sorting/negative effector of RNA Pol III synthesis	K	Transcription ;
unigene_c304	KOG0474	Cl- channel CLC-7 and related proteins (CLC superfamily)	P	Inorganic ion transport and metabolism ;
unigene_c305	KOG2917	Predicted exosome subunit	J	Translation, ribosomal structure and biogenesis ;
unigene_c306	KOG0509	Ankyrin repeat and DHHC-type Zn-finger domain containing proteins	R	General function prediction only ;
unigene_c307	KOG0498	K+-channel ERG and related proteins, contain PAS/PAC sensor domain	PT	Inorganic ion transport and metabolism ; Signal transduction mechanisms ;
unigene_c308	KOG0892	Protein kinase ATM/Tel1, involved in telomere length regulation and DNA repair	TBLD	Signal transduction mechanisms ; Chromatin structure and dynamics ; Replication, recombination and repair ; Cell cycle control, cell division, chromosome partitioning ;
unigene_c309	KOG0724	Zuotin and related molecular chaperones (DnaJ superfamily), contains DNA-binding domains	O	Posttranslational modification, protein turnover, chaperones ;
unigene_c310	KOG0198	MEKK and related serine/threonine protein kinases	T	Signal transduction mechanisms ;
unigene_c311	KOG1917	Membrane-associated hematopoietic protein	R	General function prediction only ;
unigene_c313	KOG0819	Annexin	U	Intracellular trafficking, secretion, and vesicular transport ;
unigene_c315	KOG1114	Tripeptidyl peptidase II	O	Posttranslational modification, protein turnover, chaperones ;
unigene_c316	KOG0379	Kelch repeat-containing proteins	R	General function prediction only ;
unigene_c317	KOG3138	Predicted N-acetyltransferase	R	General function prediction only ;
unigene_c318	KOG2914	Predicted haloacid-halidohydrolase and related hydrolases	R	General function prediction only ;
unigene_c320	KOG1959	Glycosyl hydrolase, family 38 - alpha-mannosidase	G	Carbohydrate transport and metabolism ;
unigene_c322	KOG4354	N-acetyl-gamma-glutamyl-phosphate reductase	E	Amino acid transport and metabolism ;
unigene_c323	KOG1349	Gpi-anchor transamidase	O	Posttranslational modification, protein turnover, chaperones ;
unigene_c324	KOG1285	Beta, beta-carotene 15,15'-dioxygenase and related enzymes	Q	Secondary metabolites biosynthesis, transport and catabolism ;
unigene_c328	KOG0619	FOG: Leucine rich repeat	R	General function prediction only ;
unigene_c331	KOG1187	Serine/threonine protein kinase	T	Signal transduction mechanisms ;
unigene_c334	KOG2042	Ubiquitin fusion degradation protein-2	O	Posttranslational modification, protein turnover, chaperones ;
unigene_c335	KOG0433	Isoleucyl-tRNA synthetase	J	Translation, ribosomal structure and biogenesis ;
unigene_c337	KOG1581	UDP-galactose transporter related protein	G	Carbohydrate transport and metabolism ;
unigene_c338	KOG1162	Predicted small molecule transporter	U	Intracellular trafficking, secretion, and vesicular transport ;
unigene_c340	KOG2282	NADH-ubiquinone oxidoreductase, NDUFS1/75 kDa subunit	C	Energy production and conversion ;
unigene_c341	KOG0161	Myosin class II heavy chain	Z	Cytoskeleton ;
unigene_c342	KOG0865	Cyclophilin type peptidyl-prolyl cis-trans isomerase	O	Posttranslational modification, protein turnover, chaperones ;
unigene_c343	KOG2532	Permease of the major facilitator superfamily	G	Carbohydrate transport and metabolism ;
unigene_c345	KOG2562	Protein phosphatase 2 regulatory subunit	A	RNA processing and modification ;
unigene_c346	KOG1552	Predicted alpha/beta hydrolase	R	General function prediction only ;
unigene_c347	KOG0446	Vacuolar sorting protein VPS1, dynamin, and related proteins	UR	Intracellular trafficking, secretion, and vesicular transport ; General function prediction only ;
unigene_c348	KOG0565	Inositol polyphosphate 5-phosphatase and related proteins	U	Intracellular trafficking, secretion, and vesicular transport ;
unigene_c349	KOG1046	Puromycin-sensitive aminopeptidase and related aminopeptidases	EO	Amino acid transport and metabolism ; Posttranslational modification, protein turnover, chaperones ;
unigene_c350	KOG0698	Serine/threonine protein phosphatase	T	Signal transduction mechanisms ;
unigene_c351	KOG4585	Predicted transposase	L	Replication, recombination and repair ;
unigene_c353	KOG4412	26S proteasome regulatory complex, subunit PSMD10	O	Posttranslational modification, protein turnover, chaperones ;
unigene_c354	KOG0370	Multifunctional pyrimidine synthesis protein CAD (includes carbamoyl-phophate synthetase, aspartate transcarbamylase, and glutamine amidotransferase)	R	General function prediction only ;
unigene_c355	KOG1329	Phospholipase D1	I	Lipid transport and metabolism ;
unigene_c357	KOG1897	Damage-specific DNA binding complex, subunit DDB1	L	Replication, recombination and repair ;
unigene_c358	KOG0157	Cytochrome P450 CYP4/CYP19/CYP26 subfamilies	QI	Secondary metabolites biosynthesis, transport and catabolism ; Lipid transport and metabolism ;
unigene_c360	KOG4584	Uncharacterized conserved protein	R	General function prediction only ;
unigene_c361	KOG1378	Purple acid phosphatase	G	Carbohydrate transport and metabolism ;
unigene_c362	KOG4673	Transcription factor TMF, TATA element modulatory factor	K	Transcription ;
unigene_c363	KOG4563	Cell cycle-regulated histone H1-binding protein	BD	Chromatin structure and dynamics ; Cell cycle control, cell division, chromosome partitioning ;
unigene_c364	KOG1474	Transcription initiation factor TFIID, subunit BDF1 and related bromodomain proteins	K	Transcription ;
unigene_c365	KOG3745	Exocyst subunit - Sec10p	U	Intracellular trafficking, secretion, and vesicular transport ;
unigene_c366	KOG1050	Trehalose-6-phosphate synthase component TPS1 and related subunits	G	Carbohydrate transport and metabolism ;
unigene_c367	KOG2468	Dolichol kinase	I	Lipid transport and metabolism ;
unigene_c368	KOG0161	Myosin class II heavy chain	Z	Cytoskeleton ;
unigene_c369	KOG2256	Predicted protein involved in nuclear export of pre-ribosomes	J	Translation, ribosomal structure and biogenesis ;
unigene_c370	KOG2273	Membrane coat complex Retromer, subunit VPS5/SNX1, Sorting nexins, and related PX domain-containing proteins	U	Intracellular trafficking, secretion, and vesicular transport ;
unigene_c371	KOG1855	Predicted RNA-binding protein	R	General function prediction only ;
unigene_c372	KOG0055	Multidrug/pheromone exporter, ABC superfamily	Q	Secondary metabolites biosynthesis, transport and catabolism ;
unigene_c373	KOG4408	Putative Mg2+ and Co2+ transporter CorD	P	Inorganic ion transport and metabolism ;
unigene_c376	KOG0258	Alanine aminotransferase	E	Amino acid transport and metabolism ;
unigene_c377	KOG2728	Uncharacterized conserved protein with similarity to phosphopantothenoylcysteine synthetase/decarboxylase	R	General function prediction only ;
unigene_c378	KOG3006	Transthyretin and related proteins	I	Lipid transport and metabolism ;
unigene_c379	KOG0161	Myosin class II heavy chain	Z	Cytoskeleton ;
unigene_c380	KOG4519	Phosphomevalonate kinase	I	Lipid transport and metabolism ;
unigene_c381	KOG4410	5-formyltetrahydrofolate cyclo-ligase	H	Coenzyme transport and metabolism ;
unigene_c382	KOG4197	FOG: PPR repeat	R	General function prediction only ;
unigene_c383	KOG4711	Predicted membrane protein	R	General function prediction only ;
unigene_c385	KOG0619	FOG: Leucine rich repeat	R	General function prediction only ;
unigene_c387	KOG4777	Aspartate-semialdehyde dehydrogenase	E	Amino acid transport and metabolism ;
unigene_c388	KOG2238	Uncharacterized conserved protein TEX2, contains PH domain	R	General function prediction only ;
unigene_c389	KOG0731	AAA+-type ATPase containing the peptidase M41 domain	O	Posttranslational modification, protein turnover, chaperones ;
unigene_c390	KOG1211	Amidases	J	Translation, ribosomal structure and biogenesis ;
unigene_c391	KOG0700	Protein phosphatase 2C/pyruvate dehydrogenase (lipoamide) phosphatase	T	Signal transduction mechanisms ;
unigene_c392	KOG0167	FOG: Armadillo/beta-catenin-like repeats	S	Function unknown ;
unigene_c393	KOG1446	Histone H3 (Lys4) methyltransferase complex and RNA cleavage factor II complex, subunit SWD2	ABO	RNA processing and modification ; Chromatin structure and dynamics ; Posttranslational modification, protein turnover, chaperones ;
unigene_c394	KOG1279	Chromatin remodeling factor subunit and related transcription factors	B	Chromatin structure and dynamics ;
unigene_c397	KOG2001	Gamma-tubulin complex, DGRIP84/SPC97 component	Z	Cytoskeleton ;
unigene_c398	KOG1187	Serine/threonine protein kinase	T	Signal transduction mechanisms ;
unigene_c399	KOG1471	Phosphatidylinositol transfer protein SEC14 and related proteins	I	Lipid transport and metabolism ;
unigene_c400	KOG4204	Histone deacetylase complex, SIN3 component	B	Chromatin structure and dynamics ;
unigene_c402	KOG2089	Metalloendopeptidase family - saccharolysin & thimet oligopeptidase	O	Posttranslational modification, protein turnover, chaperones ;
unigene_c404	KOG0698	Serine/threonine protein phosphatase	T	Signal transduction mechanisms ;
unigene_c405	KOG0018	Structural maintenance of chromosome protein 1 (sister chromatid cohesion complex Cohesin, subunit SMC1)	D	Cell cycle control, cell division, chromosome partitioning ;
unigene_c406	KOG2237	Predicted serine protease	O	Posttranslational modification, protein turnover, chaperones ;
unigene_c407	KOG0715	Molecular chaperone (DnaJ superfamily)	O	Posttranslational modification, protein turnover, chaperones ;
unigene_c408	KOG1494	NAD-dependent malate dehydrogenase	C	Energy production and conversion ;
unigene_c410	KOG4698	Uncharacterized conserved protein	S	Function unknown ;
unigene_c412	KOG1030	Predicted Ca2+-dependent phospholipid-binding protein	R	General function prediction only ;
unigene_c413	KOG3758	Uncharacterized conserved protein	S	Function unknown ;
unigene_c414	KOG1300	Vesicle trafficking protein Sec1	U	Intracellular trafficking, secretion, and vesicular transport ;
unigene_c416	KOG1082	Histone H3 (Lys9) methyltransferase SUV39H1/Clr4, required for transcriptional silencing	BK	Chromatin structure and dynamics ; Transcription ;
unigene_c417	KOG0443	Actin regulatory proteins (gelsolin/villin family)	Z	Cytoskeleton ;
unigene_c418	KOG1187	Serine/threonine protein kinase	T	Signal transduction mechanisms ;
unigene_c419	KOG1356	Putative transcription factor 5qNCA, contains JmjC domain	K	Transcription ;
unigene_c421	KOG4584	Uncharacterized conserved protein	R	General function prediction only ;
unigene_c422	KOG2375	Protein interacting with poly(A)-binding protein	A	RNA processing and modification ;
unigene_c423	KOG2150	CCR4-NOT transcriptional regulation complex, NOT5 subunit	K	Transcription ;
unigene_c424	KOG0283	WD40 repeat-containing protein	S	Function unknown ;
unigene_c428	KOG0207	Cation transport ATPase	P	Inorganic ion transport and metabolism ;
unigene_c430	KOG1764	5'-AMP-activated protein kinase, gamma subunit	C	Energy production and conversion ;
unigene_c431	KOG2786	Putative glutamate/ornithine acetyltransferase	E	Amino acid transport and metabolism ;
unigene_c432	KOG1153	Subtilisin-related protease/Vacuolar protease B	O	Posttranslational modification, protein turnover, chaperones ;
unigene_c433	KOG0946	ER-Golgi vesicle-tethering protein p115	U	Intracellular trafficking, secretion, and vesicular transport ;
unigene_c434	KOG0268	Sof1-like rRNA processing protein (contains WD40 repeats)	A	RNA processing and modification ;
unigene_c436	KOG2150	CCR4-NOT transcriptional regulation complex, NOT5 subunit	K	Transcription ;
unigene_c438	KOG2845	Activating signal cointegrator 1	K	Transcription ;
unigene_c439	KOG0582	Ste20-like serine/threonine protein kinase	T	Signal transduction mechanisms ;
unigene_c440	KOG4441	Proteins containing BTB/POZ and Kelch domains, involved in regulatory/signal transduction processes	TR	Signal transduction mechanisms ; General function prediction only ;
unigene_c441	KOG0458	Elongation factor 1 alpha	J	Translation, ribosomal structure and biogenesis ;
unigene_c443	KOG1703	Adaptor protein Enigma and related PDZ-LIM proteins	TZ	Signal transduction mechanisms ; Cytoskeleton ;
unigene_c444	KOG0731	AAA+-type ATPase containing the peptidase M41 domain	O	Posttranslational modification, protein turnover, chaperones ;
unigene_c445	KOG4178	Soluble epoxide hydrolase	I	Lipid transport and metabolism ;
unigene_c446	KOG2703	C4-type Zn-finger protein	R	General function prediction only ;
unigene_c447	KOG0711	Polyprenyl synthetase	H	Coenzyme transport and metabolism ;
unigene_c448	KOG2393	Transcription initiation factor IIF, large subunit (RAP74)	K	Transcription ;
unigene_c450	KOG0229	Phosphatidylinositol-4-phosphate 5-kinase	T	Signal transduction mechanisms ;
unigene_c452	KOG2902	Dihydroorotase	F	Nucleotide transport and metabolism ;
unigene_c453	KOG2733	Uncharacterized membrane protein	S	Function unknown ;
unigene_c455	KOG2346	Uncharacterized conserved protein	S	Function unknown ;
unigene_c456	KOG1033	eIF-2alpha kinase PEK/EIF2AK3	J	Translation, ribosomal structure and biogenesis ;
unigene_c458	KOG2190	PolyC-binding proteins alphaCP-1 and related KH domain proteins	AR	RNA processing and modification ; General function prediction only ;
unigene_c459	KOG0204	Calcium transporting ATPase	P	Inorganic ion transport and metabolism ;
unigene_c460	KOG0565	Inositol polyphosphate 5-phosphatase and related proteins	U	Intracellular trafficking, secretion, and vesicular transport ;
unigene_c461	KOG2323	Pyruvate kinase	G	Carbohydrate transport and metabolism ;
unigene_c462	KOG2855	Ribokinase	G	Carbohydrate transport and metabolism ;
unigene_c463	KOG1632	Uncharacterized PHD Zn-finger protein	R	General function prediction only ;
unigene_c464	KOG1905	Class IV sirtuins (SIR2 family)	BK	Chromatin structure and dynamics ; Transcription ;
unigene_c465	KOG1137	mRNA cleavage and polyadenylation factor II complex, BRR5 (CPSF subunit)	A	RNA processing and modification ;
unigene_c467	KOG0731	AAA+-type ATPase containing the peptidase M41 domain	O	Posttranslational modification, protein turnover, chaperones ;
unigene_c468	KOG0800	FOG: Predicted E3 ubiquitin ligase	O	Posttranslational modification, protein turnover, chaperones ;
unigene_c470	KOG0239	Kinesin (KAR3 subfamily)	Z	Cytoskeleton ;
unigene_c472	KOG1291	Mn2+ and Fe2+ transporters of the NRAMP family	P	Inorganic ion transport and metabolism ;
unigene_c473	KOG0160	Myosin class V heavy chain	Z	Cytoskeleton ;
unigene_c474	KOG0978	E3 ubiquitin ligase involved in syntaxin degradation	O	Posttranslational modification, protein turnover, chaperones ;
unigene_c475	KOG0504	FOG: Ankyrin repeat	R	General function prediction only ;
unigene_c476	KOG0787	Dehydrogenase kinase	T	Signal transduction mechanisms ;
unigene_c477	KOG1286	Amino acid transporters	E	Amino acid transport and metabolism ;
unigene_c479	KOG0240	Kinesin (SMY1 subfamily)	Z	Cytoskeleton ;
unigene_c480	KOG2832	TFIIF-interacting CTD phosphatase, including NLI-interacting factor (involved in RNA polymerase II regulation)	K	Transcription ;
unigene_c481	KOG3087	Serine/threonine protein kinase	R	General function prediction only ;
unigene_c482	KOG2173	Integral membrane protein	R	General function prediction only ;
unigene_c483	KOG4197	FOG: PPR repeat	R	General function prediction only ;
unigene_c485	KOG2924	Deoxyhypusine synthase	O	Posttranslational modification, protein turnover, chaperones ;
unigene_c486	KOG1156	N-terminal acetyltransferase	B	Chromatin structure and dynamics ;
unigene_c487	KOG2574	mRNA splicing factor PRP31	A	RNA processing and modification ;
unigene_c488	KOG1112	Ribonucleotide reductase, alpha subunit	F	Nucleotide transport and metabolism ;
unigene_c490	KOG0212	Uncharacterized conserved protein	S	Function unknown ;
unigene_c491	KOG2764	Putative transcriptional regulator DJ-1	RV	General function prediction only ; Defense mechanisms ;
unigene_c492	KOG1021	Acetylglucosaminyltransferase EXT1/exostosin 1	GMW	Carbohydrate transport and metabolism ; Cell wall/membrane/envelope biogenesis ; Extracellular structures ;
unigene_c493	KOG1211	Amidases	J	Translation, ribosomal structure and biogenesis ;
unigene_c494	KOG0230	Phosphatidylinositol-4-phosphate 5-kinase and related FYVE finger-containing proteins	T	Signal transduction mechanisms ;
unigene_c495	KOG2637	Uncharacterized conserved protein	S	Function unknown ;
unigene_c496	KOG2068	MOT2 transcription factor	K	Transcription ;
unigene_c497	KOG2747	Histone acetyltransferase (MYST family)	B	Chromatin structure and dynamics ;
unigene_c498	KOG2362	Uncharacterized Fe-S protein	R	General function prediction only ;
unigene_c499	KOG0254	Predicted transporter (major facilitator superfamily)	R	General function prediction only ;
unigene_c500	KOG1187	Serine/threonine protein kinase	T	Signal transduction mechanisms ;
unigene_c501	KOG4197	FOG: PPR repeat	R	General function prediction only ;
unigene_c502	KOG2277	S-M checkpoint control protein CID1 and related nucleotidyltransferases	D	Cell cycle control, cell division, chromosome partitioning ;
unigene_c503	KOG2537	Phosphoglucomutase/phosphomannomutase	G	Carbohydrate transport and metabolism ;
unigene_c504	KOG0160	Myosin class V heavy chain	Z	Cytoskeleton ;
unigene_c505	KOG1808	AAA ATPase containing von Willebrand factor type A (vWA) domain	R	General function prediction only ;
unigene_c508	KOG0610	Putative serine/threonine protein kinase	R	General function prediction only ;
unigene_c509	KOG1187	Serine/threonine protein kinase	T	Signal transduction mechanisms ;
unigene_c510	KOG0504	FOG: Ankyrin repeat	R	General function prediction only ;
unigene_c512	KOG0293	WD40 repeat-containing protein	S	Function unknown ;
unigene_c513	KOG0495	HAT repeat protein	A	RNA processing and modification ;
unigene_c514	KOG1071	Mitochondrial translation elongation factor EF-Tsmt, catalyzes nucleotide exchange on EF-Tumt	J	Translation, ribosomal structure and biogenesis ;
unigene_c516	KOG3211	Predicted endoplasmic reticulum membrane protein Lec35/MPDU1 involved in monosaccharide-P-dolichol utilization	R	General function prediction only ;
unigene_c517	KOG1139	Predicted ubiquitin-protein ligase of the N-recognin family	O	Posttranslational modification, protein turnover, chaperones ;
unigene_c518	KOG2657	Transmembrane glycoprotein nicastrin	TO	Signal transduction mechanisms ; Posttranslational modification, protein turnover, chaperones ;
unigene_c519	KOG2323	Pyruvate kinase	G	Carbohydrate transport and metabolism ;
unigene_c520	KOG2880	SMAD6 interacting protein AMSH, contains JAB/MPN/Mov34 domain	T	Signal transduction mechanisms ;
unigene_c521	KOG0895	Ubiquitin-conjugating enzyme	O	Posttranslational modification, protein turnover, chaperones ;
unigene_c522	KOG2303	Predicted NAD synthase, contains CN hydrolase domain	HR	Coenzyme transport and metabolism ; General function prediction only ;
unigene_c523	KOG0619	FOG: Leucine rich repeat	R	General function prediction only ;
unigene_c524	KOG0059	Lipid exporter ABCA1 and related proteins, ABC superfamily	IR	Lipid transport and metabolism ; General function prediction only ;
unigene_c525	KOG2495	NADH-dehydrogenase (ubiquinone)	C	Energy production and conversion ;
unigene_c526	KOG1947	Leucine rich repeat proteins, some proteins contain F-box	R	General function prediction only ;
unigene_c527	KOG1256	Long-chain acyl-CoA synthetases (AMP-forming)	I	Lipid transport and metabolism ;
unigene_c528	KOG0725	Reductases with broad range of substrate specificities	R	General function prediction only ;
unigene_c529	KOG2703	C4-type Zn-finger protein	R	General function prediction only ;
unigene_c530	KOG1845	MORC family ATPases	D	Cell cycle control, cell division, chromosome partitioning ;
unigene_c531	KOG1395	Tryptophan synthase beta chain	E	Amino acid transport and metabolism ;
unigene_c533	KOG1123	RNA polymerase II transcription initiation/nucleotide excision repair factor TFIIH, 3'-5' helicase subunit SSL2	KL	Transcription ; Replication, recombination and repair ;
unigene_c534	KOG1185	Thiamine pyrophosphate-requiring enzyme	EH	Amino acid transport and metabolism ; Coenzyme transport and metabolism ;
unigene_c535	KOG2761	START domain-containing proteins involved in steroidogenesis/phosphatidylcholine transfer	I	Lipid transport and metabolism ;
unigene_c536	KOG4036	Uncharacterized conserved protein	S	Function unknown ;
unigene_c537	KOG0127	Nucleolar protein fibrillarin NOP77 (RRM superfamily)	A	RNA processing and modification ;
unigene_c538	KOG3258	Parvulin-like peptidyl-prolyl cis-trans isomerase	O	Posttranslational modification, protein turnover, chaperones ;
unigene_c539	KOG1867	Ubiquitin-specific protease	O	Posttranslational modification, protein turnover, chaperones ;
unigene_c540	KOG0802	E3 ubiquitin ligase	O	Posttranslational modification, protein turnover, chaperones ;
unigene_c541	KOG1379	Serine/threonine protein phosphatase	T	Signal transduction mechanisms ;
unigene_c542	KOG0522	Ankyrin repeat protein	R	General function prediction only ;
unigene_c543	KOG1176	Acyl-CoA synthetase	I	Lipid transport and metabolism ;
unigene_c544	KOG0470	1,4-alpha-glucan branching enzyme/starch branching enzyme II	G	Carbohydrate transport and metabolism ;
unigene_c545	KOG2176	Exocyst complex, subunit SEC15	U	Intracellular trafficking, secretion, and vesicular transport ;
unigene_c547	KOG3069	Peroxisomal NUDIX hydrolase	L	Replication, recombination and repair ;
unigene_c548	KOG2109	WD40 repeat protein	R	General function prediction only ;
unigene_c550	KOG0800	FOG: Predicted E3 ubiquitin ligase	O	Posttranslational modification, protein turnover, chaperones ;
unigene_c551	KOG2073	SAP family cell cycle dependent phosphatase-associated protein	D	Cell cycle control, cell division, chromosome partitioning ;
unigene_c553	KOG0192	Tyrosine kinase specific for activated (GTP-bound) p21cdc42Hs	T	Signal transduction mechanisms ;
unigene_c555	KOG1919	RNA pseudouridylate synthases	A	RNA processing and modification ;
unigene_c556	KOG2761	START domain-containing proteins involved in steroidogenesis/phosphatidylcholine transfer	I	Lipid transport and metabolism ;
unigene_c557	KOG1247	Methionyl-tRNA synthetase	J	Translation, ribosomal structure and biogenesis ;
unigene_c558	KOG1124	FOG: TPR repeat	R	General function prediction only ;
unigene_c560	KOG1153	Subtilisin-related protease/Vacuolar protease B	O	Posttranslational modification, protein turnover, chaperones ;
unigene_c561	KOG0497	Oxidosqualene-lanosterol cyclase and related proteins	I	Lipid transport and metabolism ;
unigene_c562	KOG0800	FOG: Predicted E3 ubiquitin ligase	O	Posttranslational modification, protein turnover, chaperones ;
unigene_c563	KOG0533	RRM motif-containing protein	A	RNA processing and modification ;
unigene_c564	KOG0946	ER-Golgi vesicle-tethering protein p115	U	Intracellular trafficking, secretion, and vesicular transport ;
unigene_c567	KOG1339	Aspartyl protease	O	Posttranslational modification, protein turnover, chaperones ;
unigene_c568	KOG1237	H+/oligopeptide symporter	E	Amino acid transport and metabolism ;
unigene_c569	KOG2350	Zn-finger protein joined to JAZF1 (predicted suppressor)	R	General function prediction only ;
unigene_c571	KOG0328	Predicted ATP-dependent RNA helicase FAL1, involved in rRNA maturation, DEAD-box superfamily	J	Translation, ribosomal structure and biogenesis ;
unigene_c572	KOG4223	Reticulocalbin, calumenin, DNA supercoiling factor, and related Ca2+-binding proteins of the CREC family (EF-Hand protein superfamily)	TU	Signal transduction mechanisms ; Intracellular trafficking, secretion, and vesicular transport ;
unigene_c574	KOG1877	Putative transmembrane protein cmp44E	R	General function prediction only ;
unigene_c575	KOG2481	Protein required for normal rRNA processing	A	RNA processing and modification ;
unigene_c576	KOG1269	SAM-dependent methyltransferases	IR	Lipid transport and metabolism ; General function prediction only ;
unigene_c577	KOG2450	Aldehyde dehydrogenase	C	Energy production and conversion ;
unigene_c578	KOG0054	Multidrug resistance-associated protein/mitoxantrone resistance protein, ABC superfamily	Q	Secondary metabolites biosynthesis, transport and catabolism ;
unigene_c579	KOG1336	Monodehydroascorbate/ferredoxin reductase	R	General function prediction only ;
unigene_c580	KOG4249	Uncharacterized conserved protein	S	Function unknown ;
unigene_c581	KOG1624	Mitochondrial/chloroplast ribosomal protein L4	J	Translation, ribosomal structure and biogenesis ;
unigene_c582	KOG4249	Uncharacterized conserved protein	S	Function unknown ;
unigene_c583	KOG1241	Karyopherin (importin) beta 1	YU	Nuclear structure ; Intracellular trafficking, secretion, and vesicular transport ;
unigene_c584	KOG2625	Uncharacterized conserved protein	S	Function unknown ;
unigene_c586	KOG0524	Pyruvate dehydrogenase E1, beta subunit	C	Energy production and conversion ;
unigene_c587	KOG0559	Dihydrolipoamide succinyltransferase (2-oxoglutarate dehydrogenase, E2 subunit)	C	Energy production and conversion ;
unigene_c588	KOG1187	Serine/threonine protein kinase	T	Signal transduction mechanisms ;
unigene_c589	KOG1550	Extracellular protein SEL-1 and related proteins	MOT	Cell wall/membrane/envelope biogenesis ; Posttranslational modification, protein turnover, chaperones ; Signal transduction mechanisms ;
unigene_c590	KOG1239	Inner membrane protein translocase involved in respiratory chain assembly	OU	Posttranslational modification, protein turnover, chaperones ; Intracellular trafficking, secretion, and vesicular transport ;
unigene_c591	KOG2018	Predicted dinucleotide-utilizing enzyme involved in molybdopterin and thiamine biosynthesis	O	Posttranslational modification, protein turnover, chaperones ;
unigene_c594	KOG0192	Tyrosine kinase specific for activated (GTP-bound) p21cdc42Hs	T	Signal transduction mechanisms ;
unigene_c595	KOG2608	Endoplasmic reticulum membrane-associated oxidoreductin involved in disulfide bond formation	OU	Posttranslational modification, protein turnover, chaperones ; Intracellular trafficking, secretion, and vesicular transport ;
unigene_c596	KOG1552	Predicted alpha/beta hydrolase	R	General function prediction only ;
unigene_c597	KOG0688	Peptide chain release factor 1 (eRF1)	J	Translation, ribosomal structure and biogenesis ;
unigene_c598	KOG1087	Cytosolic sorting protein GGA2/TOM1	U	Intracellular trafficking, secretion, and vesicular transport ;
unigene_c600	KOG2026	Spindle pole body protein - Sad1p	Z	Cytoskeleton ;
unigene_c601	KOG0553	TPR repeat-containing protein	R	General function prediction only ;
unigene_c602	KOG1267	Mitochondrial transcription termination factor, mTERF	KR	Transcription ; General function prediction only ;
unigene_c604	KOG2443	Uncharacterized conserved protein	S	Function unknown ;
unigene_c605	KOG0800	FOG: Predicted E3 ubiquitin ligase	O	Posttranslational modification, protein turnover, chaperones ;
unigene_c606	KOG1588	RNA-binding protein Sam68 and related KH domain proteins	A	RNA processing and modification ;
unigene_c608	KOG0062	ATPase component of ABC transporters with duplicated ATPase domains/Translation elongation factor EF-3b	EJ	Amino acid transport and metabolism ; Translation, ribosomal structure and biogenesis ;
unigene_c609	KOG2871	Uncharacterized conserved protein	S	Function unknown ;
unigene_c610	KOG1474	Transcription initiation factor TFIID, subunit BDF1 and related bromodomain proteins	K	Transcription ;
unigene_c611	KOG1616	Protein involved in Snf1 protein kinase complex assembly	G	Carbohydrate transport and metabolism ;
unigene_c613	KOG2211	Predicted Golgi transport complex 1 protein	U	Intracellular trafficking, secretion, and vesicular transport ;
unigene_c614	KOG1354	Serine/threonine protein phosphatase 2A, regulatory subunit	T	Signal transduction mechanisms ;
unigene_c615	KOG0724	Zuotin and related molecular chaperones (DnaJ superfamily), contains DNA-binding domains	O	Posttranslational modification, protein turnover, chaperones ;
unigene_c616	KOG1618	Predicted phosphatase	R	General function prediction only ;
unigene_c617	KOG3339	Predicted glycosyltransferase	R	General function prediction only ;
unigene_c619	KOG1432	Predicted DNA repair exonuclease SIA1	R	General function prediction only ;
unigene_c620	KOG0519	Sensory transduction histidine kinase	T	Signal transduction mechanisms ;
unigene_c623	KOG3126	Porin/voltage-dependent anion-selective channel protein	P	Inorganic ion transport and metabolism ;
unigene_c624	KOG2344	Exocyst component protein and related proteins	U	Intracellular trafficking, secretion, and vesicular transport ;
unigene_c625	KOG1096	Adenosine monophosphate deaminase	F	Nucleotide transport and metabolism ;
unigene_c626	KOG2189	Vacuolar H+-ATPase V0 sector, subunit a	C	Energy production and conversion ;
unigene_c628	KOG2953	mRNA-binding protein Encore	A	RNA processing and modification ;
unigene_c629	KOG1107	Membrane coat complex Retromer, subunit VPS35	U	Intracellular trafficking, secretion, and vesicular transport ;
unigene_c630	KOG1281	Na+/dicarboxylate, Na+/tricarboxylate and phosphate transporters	P	Inorganic ion transport and metabolism ;
unigene_c631	KOG4161	Methyl-CpG binding transcription regulators	KB	Transcription ; Chromatin structure and dynamics ;
unigene_c632	KOG4426	Arginyl-tRNA synthetase	J	Translation, ribosomal structure and biogenesis ;
unigene_c633	KOG1795	U5 snRNP spliceosome subunit	A	RNA processing and modification ;
unigene_c634	KOG0054	Multidrug resistance-associated protein/mitoxantrone resistance protein, ABC superfamily	Q	Secondary metabolites biosynthesis, transport and catabolism ;
unigene_c635	KOG1303	Amino acid transporters	E	Amino acid transport and metabolism ;
unigene_c636	KOG0663	Protein kinase PITSLRE and related kinases	R	General function prediction only ;
unigene_c637	KOG0251	Clathrin assembly protein AP180 and related proteins, contain ENTH domain	TU	Signal transduction mechanisms ; Intracellular trafficking, secretion, and vesicular transport ;
unigene_c639	KOG0161	Myosin class II heavy chain	Z	Cytoskeleton ;
unigene_c640	KOG3032	Uncharacterized conserved protein	S	Function unknown ;
unigene_c641	KOG3980	RNA 3'-terminal phosphate cyclase	A	RNA processing and modification ;
unigene_c643	KOG0161	Myosin class II heavy chain	Z	Cytoskeleton ;
unigene_c644	KOG1291	Mn2+ and Fe2+ transporters of the NRAMP family	P	Inorganic ion transport and metabolism ;
unigene_c645	KOG1187	Serine/threonine protein kinase	T	Signal transduction mechanisms ;
unigene_c652	KOG0213	Splicing factor 3b, subunit 1	A	RNA processing and modification ;
unigene_c653	KOG2350	Zn-finger protein joined to JAZF1 (predicted suppressor)	R	General function prediction only ;
unigene_c654	KOG3042	Panthothenate synthetase	H	Coenzyme transport and metabolism ;
unigene_c655	KOG3005	GIY-YIG type nuclease	R	General function prediction only ;
unigene_c656	KOG0331	ATP-dependent RNA helicase	A	RNA processing and modification ;
unigene_c657	KOG0895	Ubiquitin-conjugating enzyme	O	Posttranslational modification, protein turnover, chaperones ;
unigene_c659	KOG0008	Transcription initiation factor TFIID, subunit TAF1	K	Transcription ;
unigene_c661	KOG2338	Transcriptional effector CCR4-related protein	K	Transcription ;
unigene_c662	KOG1999	RNA polymerase II transcription elongation factor DSIF/SUPT5H/SPT5	K	Transcription ;
unigene_c663	KOG0948	Nuclear exosomal RNA helicase MTR4, DEAD-box superfamily	A	RNA processing and modification ;
unigene_c665	KOG4660	Protein Mei2, essential for commitment to meiosis, and related proteins	D	Cell cycle control, cell division, chromosome partitioning ;
unigene_c666	KOG0082	G-protein alpha subunit (small G protein superfamily)	DT	Cell cycle control, cell division, chromosome partitioning ; Signal transduction mechanisms ;
unigene_c667	KOG2849	Placental protein 11	R	General function prediction only ;
unigene_c668	KOG2383	Predicted ATPase	R	General function prediction only ;
unigene_c669	KOG1237	H+/oligopeptide symporter	E	Amino acid transport and metabolism ;
unigene_c670	KOG1982	Nuclear 5'-3' exoribonuclease-interacting protein, Rai1p	L	Replication, recombination and repair ;
unigene_c671	KOG0853	Glycosyltransferase	M	Cell wall/membrane/envelope biogenesis ;
unigene_c673	KOG0800	FOG: Predicted E3 ubiquitin ligase	O	Posttranslational modification, protein turnover, chaperones ;
unigene_c674	KOG4629	Predicted mechanosensitive ion channel	M	Cell wall/membrane/envelope biogenesis ;
unigene_c675	KOG4197	FOG: PPR repeat	R	General function prediction only ;
unigene_c676	KOG0254	Predicted transporter (major facilitator superfamily)	R	General function prediction only ;
unigene_c679	KOG2388	UDP-N-acetylglucosamine pyrophosphorylase	M	Cell wall/membrane/envelope biogenesis ;
unigene_c680	KOG0160	Myosin class V heavy chain	Z	Cytoskeleton ;
unigene_c681	KOG0240	Kinesin (SMY1 subfamily)	Z	Cytoskeleton ;
unigene_c682	KOG1231	Proteins containing the FAD binding domain	C	Energy production and conversion ;
unigene_c683	KOG4658	Apoptotic ATPase	T	Signal transduction mechanisms ;
unigene_c685	KOG0246	Kinesin-like protein	Z	Cytoskeleton ;
unigene_c687	KOG0198	MEKK and related serine/threonine protein kinases	T	Signal transduction mechanisms ;
unigene_c689	KOG0895	Ubiquitin-conjugating enzyme	O	Posttranslational modification, protein turnover, chaperones ;
unigene_c691	KOG0265	U5 snRNP-specific protein-like factor and related proteins	A	RNA processing and modification ;
unigene_c692	KOG0192	Tyrosine kinase specific for activated (GTP-bound) p21cdc42Hs	T	Signal transduction mechanisms ;
unigene_c693	KOG0027	Calmodulin and related proteins (EF-Hand superfamily)	T	Signal transduction mechanisms ;
unigene_c694	KOG1616	Protein involved in Snf1 protein kinase complex assembly	G	Carbohydrate transport and metabolism ;
unigene_c695	KOG1239	Inner membrane protein translocase involved in respiratory chain assembly	OU	Posttranslational modification, protein turnover, chaperones ; Intracellular trafficking, secretion, and vesicular transport ;
unigene_c696	KOG1303	Amino acid transporters	E	Amino acid transport and metabolism ;
unigene_c697	KOG2190	PolyC-binding proteins alphaCP-1 and related KH domain proteins	AR	RNA processing and modification ; General function prediction only ;
unigene_c699	KOG2427	Uncharacterized conserved protein	S	Function unknown ;
unigene_c701	KOG1865	Ubiquitin carboxyl-terminal hydrolase	O	Posttranslational modification, protein turnover, chaperones ;
unigene_c702	KOG2641	Predicted seven transmembrane receptor - rhodopsin family	T	Signal transduction mechanisms ;
unigene_c703	KOG0157	Cytochrome P450 CYP4/CYP19/CYP26 subfamilies	QI	Secondary metabolites biosynthesis, transport and catabolism ; Lipid transport and metabolism ;
unigene_c705	KOG2369	Lecithin:cholesterol acyltransferase (LCAT)/Acyl-ceramide synthase	I	Lipid transport and metabolism ;
unigene_c708	KOG1291	Mn2+ and Fe2+ transporters of the NRAMP family	P	Inorganic ion transport and metabolism ;
unigene_c710	KOG2145	Cytoplasmic tryptophanyl-tRNA synthetase	J	Translation, ribosomal structure and biogenesis ;
unigene_c711	KOG0061	Transporter, ABC superfamily (Breast cancer resistance protein)	Q	Secondary metabolites biosynthesis, transport and catabolism ;
unigene_c712	KOG2245	Poly(A) polymerase and related nucleotidyltransferases	A	RNA processing and modification ;
unigene_c715	KOG2200	Tumour suppressor protein p122-RhoGAP/DLC1	T	Signal transduction mechanisms ;
unigene_c716	KOG0800	FOG: Predicted E3 ubiquitin ligase	O	Posttranslational modification, protein turnover, chaperones ;
unigene_c717	KOG3786	RNA polymerase II assessory factor Cdc73p	K	Transcription ;
unigene_c718	KOG1187	Serine/threonine protein kinase	T	Signal transduction mechanisms ;
unigene_c719	KOG0367	Protein geranylgeranyltransferase Type I, beta subunit	O	Posttranslational modification, protein turnover, chaperones ;
unigene_c720	KOG1666	V-SNARE	U	Intracellular trafficking, secretion, and vesicular transport ;
unigene_c721	KOG0334	RNA helicase	A	RNA processing and modification ;
unigene_c722	KOG4271	Rho-GTPase activating protein	T	Signal transduction mechanisms ;
unigene_c723	KOG1964	Nuclear pore complex, rNup107 component (sc Nup84)	YU	Nuclear structure ; Intracellular trafficking, secretion, and vesicular transport ;
unigene_c725	KOG1241	Karyopherin (importin) beta 1	YU	Nuclear structure ; Intracellular trafficking, secretion, and vesicular transport ;
unigene_c728	KOG1153	Subtilisin-related protease/Vacuolar protease B	O	Posttranslational modification, protein turnover, chaperones ;
unigene_c729	KOG2501	Thioredoxin, nucleoredoxin and related proteins	R	General function prediction only ;
unigene_c730	KOG0305	Anaphase promoting complex, Cdc20, Cdh1, and Ama1 subunits	DO	Cell cycle control, cell division, chromosome partitioning ; Posttranslational modification, protein turnover, chaperones ;
unigene_c731	KOG0924	mRNA splicing factor ATP-dependent RNA helicase	A	RNA processing and modification ;
unigene_c732	KOG0313	Microtubule binding protein YTM1 (contains WD40 repeats)	Z	Cytoskeleton ;
unigene_c733	KOG1237	H+/oligopeptide symporter	E	Amino acid transport and metabolism ;
unigene_c736	KOG0520	Uncharacterized conserved protein, contains IPT/TIG domain	S	Function unknown ;
unigene_c737	KOG0804	Cytoplasmic Zn-finger protein BRAP2 (BRCA1 associated protein)	R	General function prediction only ;
unigene_c738	KOG1454	Predicted hydrolase/acyltransferase (alpha/beta hydrolase superfamily)	R	General function prediction only ;
unigene_c739	KOG1153	Subtilisin-related protease/Vacuolar protease B	O	Posttranslational modification, protein turnover, chaperones ;
unigene_c740	KOG1187	Serine/threonine protein kinase	T	Signal transduction mechanisms ;
unigene_c741	KOG2467	Glycine/serine hydroxymethyltransferase	E	Amino acid transport and metabolism ;
unigene_c742	KOG2344	Exocyst component protein and related proteins	U	Intracellular trafficking, secretion, and vesicular transport ;
unigene_c743	KOG0773	Transcription factor MEIS1 and related HOX domain proteins	K	Transcription ;
unigene_c744	KOG1843	Uncharacterized conserved protein	S	Function unknown ;
unigene_c745	KOG1347	Uncharacterized membrane protein, predicted efflux pump	R	General function prediction only ;
unigene_c746	KOG1879	UDP-glucose:glycoprotein glucosyltransferase	G	Carbohydrate transport and metabolism ;
unigene_c747	KOG3144	Ethanolamine-P-transferase GPI11/PIG-F, involved in glycosylphosphatidylinositol anchor biosynthesis	MO	Cell wall/membrane/envelope biogenesis ; Posttranslational modification, protein turnover, chaperones ;
unigene_c748	KOG1187	Serine/threonine protein kinase	T	Signal transduction mechanisms ;
unigene_c749	KOG0323	TFIIF-interacting CTD phosphatases, including NLI-interacting factor	K	Transcription ;
unigene_c750	KOG0627	Heat shock transcription factor	K	Transcription ;
unigene_c751	KOG1888	Putative phosphoinositide phosphatase	I	Lipid transport and metabolism ;
unigene_c752	KOG0147	Transcriptional coactivator CAPER (RRM superfamily)	K	Transcription ;
unigene_c755	KOG1187	Serine/threonine protein kinase	T	Signal transduction mechanisms ;
unigene_c756	KOG2673	Uncharacterized conserved protein, contains PSP domain	S	Function unknown ;
unigene_c757	KOG3662	Cell division control protein/predicted DNA repair exonuclease	L	Replication, recombination and repair ;
unigene_c758	KOG2344	Exocyst component protein and related proteins	U	Intracellular trafficking, secretion, and vesicular transport ;
unigene_c760	KOG4197	FOG: PPR repeat	R	General function prediction only ;
unigene_c761	KOG0981	DNA topoisomerase I	L	Replication, recombination and repair ;
unigene_c762	KOG0368	Acetyl-CoA carboxylase	I	Lipid transport and metabolism ;
unigene_c763	KOG2434	RNA polymerase I transcription factor	K	Transcription ;
unigene_c766	KOG0253	Synaptic vesicle transporter SV2 (major facilitator superfamily)	R	General function prediction only ;
unigene_c767	KOG0167	FOG: Armadillo/beta-catenin-like repeats	S	Function unknown ;
unigene_c769	KOG4197	FOG: PPR repeat	R	General function prediction only ;
unigene_c770	KOG2521	Uncharacterized conserved protein	S	Function unknown ;
unigene_c773	KOG0925	mRNA splicing factor ATP-dependent RNA helicase	A	RNA processing and modification ;
unigene_c774	KOG0236	Sulfate/bicarbonate/oxalate exchanger SAT-1 and related transporters (SLC26 family)	P	Inorganic ion transport and metabolism ;
unigene_c775	KOG1082	Histone H3 (Lys9) methyltransferase SUV39H1/Clr4, required for transcriptional silencing	BK	Chromatin structure and dynamics ; Transcription ;
unigene_c776	KOG2426	Dihydroxyacetone kinase/glycerone kinase	G	Carbohydrate transport and metabolism ;
unigene_c777	KOG0370	Multifunctional pyrimidine synthesis protein CAD (includes carbamoyl-phophate synthetase, aspartate transcarbamylase, and glutamine amidotransferase)	R	General function prediction only ;
unigene_c778	KOG2019	Metalloendoprotease HMP1 (insulinase superfamily)	RO	General function prediction only ; Posttranslational modification, protein turnover, chaperones ;
unigene_c780	KOG1968	Replication factor C, subunit RFC1 (large subunit)	L	Replication, recombination and repair ;
unigene_c781	KOG1187	Serine/threonine protein kinase	T	Signal transduction mechanisms ;
unigene_c783	KOG0929	Guanine nucleotide exchange factor	U	Intracellular trafficking, secretion, and vesicular transport ;
unigene_c784	KOG1278	Endosomal membrane proteins, EMP70	U	Intracellular trafficking, secretion, and vesicular transport ;
unigene_c785	KOG0653	Cyclin B and related kinase-activating proteins	D	Cell cycle control, cell division, chromosome partitioning ;
unigene_c789	KOG2044	5'-3' exonuclease HKE1/RAT1	LA	Replication, recombination and repair ; RNA processing and modification ;
unigene_c790	KOG1276	Protoporphyrinogen oxidase	H	Coenzyme transport and metabolism ;
unigene_c791	KOG0161	Myosin class II heavy chain	Z	Cytoskeleton ;
unigene_c792	KOG0851	Single-stranded DNA-binding replication protein A (RPA), large (70 kD) subunit and related ssDNA-binding proteins	L	Replication, recombination and repair ;
unigene_c793	KOG3018	Malonyl-CoA decarboxylase	G	Carbohydrate transport and metabolism ;
unigene_c794	KOG0068	D-3-phosphoglycerate dehydrogenase, D-isomer-specific 2-hydroxy acid dehydrogenase superfamily	E	Amino acid transport and metabolism ;
unigene_c795	KOG0430	Xanthine dehydrogenase	F	Nucleotide transport and metabolism ;
unigene_c796	KOG2937	Decapping enzyme complex, predicted pyrophosphatase DCP2	A	RNA processing and modification ;
unigene_c798	KOG3022	Predicted ATPase, nucleotide-binding	D	Cell cycle control, cell division, chromosome partitioning ;
unigene_c799	KOG2190	PolyC-binding proteins alphaCP-1 and related KH domain proteins	AR	RNA processing and modification ; General function prediction only ;
unigene_c800	KOG0236	Sulfate/bicarbonate/oxalate exchanger SAT-1 and related transporters (SLC26 family)	P	Inorganic ion transport and metabolism ;
unigene_c801	KOG2795	Catalytic subunit of the meiotic double strand break transesterase	L	Replication, recombination and repair ;
unigene_c802	KOG0765	Predicted mitochondrial carrier protein	C	Energy production and conversion ;
unigene_c803	KOG0156	Cytochrome P450 CYP2 subfamily	Q	Secondary metabolites biosynthesis, transport and catabolism ;
unigene_c804	KOG1303	Amino acid transporters	E	Amino acid transport and metabolism ;
unigene_c805	KOG2522	Filamentous baseplate protein Ligatin, contains PUA domain	J	Translation, ribosomal structure and biogenesis ;
unigene_c806	KOG1339	Aspartyl protease	O	Posttranslational modification, protein turnover, chaperones ;
unigene_c808	KOG0190	Protein disulfide isomerase (prolyl 4-hydroxylase beta subunit)	O	Posttranslational modification, protein turnover, chaperones ;
unigene_c810	KOG2680	DNA helicase TIP49, TBP-interacting protein	K	Transcription ;
unigene_c811	KOG2963	RNA-binding protein required for 60S ribosomal subunit biogenesis	J	Translation, ribosomal structure and biogenesis ;
unigene_c812	KOG2074	RNA polymerase II transcription initiation/nucleotide excision repair factor TFIIH, subunit TFB1	KL	Transcription ; Replication, recombination and repair ;
unigene_c813	KOG2866	Uncharacterized conserved protein	S	Function unknown ;
unigene_c814	KOG1278	Endosomal membrane proteins, EMP70	U	Intracellular trafficking, secretion, and vesicular transport ;
unigene_c815	KOG3213	Transcription factor IIB	K	Transcription ;
unigene_c816	KOG2663	Acetolactate synthase, small subunit	E	Amino acid transport and metabolism ;
unigene_c817	KOG1339	Aspartyl protease	O	Posttranslational modification, protein turnover, chaperones ;
unigene_c818	KOG1845	MORC family ATPases	D	Cell cycle control, cell division, chromosome partitioning ;
unigene_c820	KOG0583	Serine/threonine protein kinase	T	Signal transduction mechanisms ;
unigene_c822	KOG0192	Tyrosine kinase specific for activated (GTP-bound) p21cdc42Hs	T	Signal transduction mechanisms ;
unigene_c823	KOG1021	Acetylglucosaminyltransferase EXT1/exostosin 1	GMW	Carbohydrate transport and metabolism ; Cell wall/membrane/envelope biogenesis ; Extracellular structures ;
unigene_c824	KOG2463	Predicted RNA-binding protein Nob1p involved in 26S proteasome assembly	O	Posttranslational modification, protein turnover, chaperones ;
unigene_c829	KOG1342	Histone deacetylase complex, catalytic component RPD3	B	Chromatin structure and dynamics ;
unigene_c830	KOG4230	C1-tetrahydrofolate synthase	H	Coenzyme transport and metabolism ;
unigene_c831	KOG1276	Protoporphyrinogen oxidase	H	Coenzyme transport and metabolism ;
unigene_c832	KOG2783	Phenylalanyl-tRNA synthetase	J	Translation, ribosomal structure and biogenesis ;
unigene_c833	KOG2031	Tyrosyl-DNA phosphodiesterase	L	Replication, recombination and repair ;
unigene_c834	KOG1674	Cyclin	R	General function prediction only ;
unigene_c836	KOG4658	Apoptotic ATPase	T	Signal transduction mechanisms ;
unigene_c837	KOG2283	Clathrin coat dissociation kinase GAK/PTEN/Auxilin and related tyrosine phosphatases	TR	Signal transduction mechanisms ; General function prediction only ;
unigene_c838	KOG4541	Nuclear transport receptor exportin 4 (importin beta superfamily)	YU	Nuclear structure ; Intracellular trafficking, secretion, and vesicular transport ;
unigene_c840	KOG2570	SWI/SNF transcription activation complex subunit	BK	Chromatin structure and dynamics ; Transcription ;
unigene_c842	KOG1187	Serine/threonine protein kinase	T	Signal transduction mechanisms ;
unigene_c843	KOG1959	Glycosyl hydrolase, family 38 - alpha-mannosidase	G	Carbohydrate transport and metabolism ;
unigene_c844	KOG1719	Dual specificity phosphatase	V	Defense mechanisms ;
unigene_c845	KOG0619	FOG: Leucine rich repeat	R	General function prediction only ;
unigene_c846	KOG2451	Aldehyde dehydrogenase	C	Energy production and conversion ;
unigene_c848	KOG0946	ER-Golgi vesicle-tethering protein p115	U	Intracellular trafficking, secretion, and vesicular transport ;
unigene_c850	KOG4660	Protein Mei2, essential for commitment to meiosis, and related proteins	D	Cell cycle control, cell division, chromosome partitioning ;
unigene_c851	KOG2301	Voltage-gated Ca2+ channels, alpha1 subunits	PT	Inorganic ion transport and metabolism ; Signal transduction mechanisms ;
unigene_c852	KOG1801	tRNA-splicing endonuclease positive effector (SEN1)	A	RNA processing and modification ;
unigene_c853	KOG1292	Xanthine/uracil transporters	F	Nucleotide transport and metabolism ;
unigene_c854	KOG4658	Apoptotic ATPase	T	Signal transduction mechanisms ;
unigene_c855	KOG1237	H+/oligopeptide symporter	E	Amino acid transport and metabolism ;
unigene_c856	KOG4416	Uncharacterized conserved protein	S	Function unknown ;
unigene_c857	KOG0610	Putative serine/threonine protein kinase	R	General function prediction only ;
unigene_c858	KOG0161	Myosin class II heavy chain	Z	Cytoskeleton ;
unigene_c860	KOG1292	Xanthine/uracil transporters	F	Nucleotide transport and metabolism ;
unigene_c861	KOG2619	Fucosyltransferase	GE	Carbohydrate transport and metabolism ; Amino acid transport and metabolism ;
unigene_c863	KOG0509	Ankyrin repeat and DHHC-type Zn-finger domain containing proteins	R	General function prediction only ;
unigene_c864	KOG0264	Nucleosome remodeling factor, subunit CAF1/NURF55/MSI1	B	Chromatin structure and dynamics ;
unigene_c865	KOG0700	Protein phosphatase 2C/pyruvate dehydrogenase (lipoamide) phosphatase	T	Signal transduction mechanisms ;
unigene_c866	KOG1012	Ca2+-dependent lipid-binding protein CLB1/vesicle protein vp115/Granuphilin A, contains C2 domain	R	General function prediction only ;
unigene_c867	KOG3111	D-ribulose-5-phosphate 3-epimerase	G	Carbohydrate transport and metabolism ;
unigene_c868	KOG0277	Peroxisomal targeting signal type 2 receptor	U	Intracellular trafficking, secretion, and vesicular transport ;
unigene_c869	KOG1987	Speckle-type POZ protein SPOP and related proteins with TRAF, MATH and BTB/POZ domains	DR	Cell cycle control, cell division, chromosome partitioning ; General function prediction only ;
unigene_c870	KOG2258	Glycerophosphoryl diester phosphodiesterase	C	Energy production and conversion ;
unigene_c871	KOG2833	Mevalonate pyrophosphate decarboxylase	I	Lipid transport and metabolism ;
unigene_c872	KOG0029	Amine oxidase	Q	Secondary metabolites biosynthesis, transport and catabolism ;
unigene_c874	KOG0412	Golgi transport complex COD1 protein	U	Intracellular trafficking, secretion, and vesicular transport ;
unigene_c875	KOG2306	Uncharacterized conserved protein	S	Function unknown ;
unigene_c876	KOG0156	Cytochrome P450 CYP2 subfamily	Q	Secondary metabolites biosynthesis, transport and catabolism ;
unigene_c877	KOG1003	Actin filament-coating protein tropomyosin	Z	Cytoskeleton ;
unigene_c878	KOG2555	AICAR transformylase/IMP cyclohydrolase/methylglyoxal synthase	F	Nucleotide transport and metabolism ;
unigene_c879	KOG0144	RNA-binding protein CUGBP1/BRUNO (RRM superfamily)	A	RNA processing and modification ;
unigene_c880	KOG0805	Carbon-nitrogen hydrolase	E	Amino acid transport and metabolism ;
unigene_c883	KOG1362	Choline transporter-like protein	I	Lipid transport and metabolism ;
unigene_c884	KOG0773	Transcription factor MEIS1 and related HOX domain proteins	K	Transcription ;
unigene_c885	KOG1286	Amino acid transporters	E	Amino acid transport and metabolism ;
unigene_c886	KOG1840	Kinesin light chain	Z	Cytoskeleton ;
unigene_c887	KOG2757	Mannose-6-phosphate isomerase	G	Carbohydrate transport and metabolism ;
unigene_c888	KOG4548	Mitochondrial ribosomal protein L17	J	Translation, ribosomal structure and biogenesis ;
unigene_c892	KOG0625	Phosphoglucomutase	G	Carbohydrate transport and metabolism ;
unigene_c893	KOG3074	Transcriptional regulator of the PUR family, single-stranded-DNA-binding	K	Transcription ;
unigene_c894	KOG0888	Nucleoside diphosphate kinase	F	Nucleotide transport and metabolism ;
unigene_c895	KOG0738	AAA+-type ATPase	O	Posttranslational modification, protein turnover, chaperones ;
unigene_c897	KOG0143	Iron/ascorbate family oxidoreductases	QR	Secondary metabolites biosynthesis, transport and catabolism ; General function prediction only ;
unigene_c898	KOG0556	Aspartyl-tRNA synthetase	J	Translation, ribosomal structure and biogenesis ;
unigene_c899	KOG3029	Glutathione S-transferase-related protein	R	General function prediction only ;
unigene_c900	KOG1347	Uncharacterized membrane protein, predicted efflux pump	R	General function prediction only ;
unigene_c902	KOG1555	26S proteasome regulatory complex, subunit RPN11	O	Posttranslational modification, protein turnover, chaperones ;
unigene_c903	KOG0032	Ca2+/calmodulin-dependent protein kinase, EF-Hand protein superfamily	T	Signal transduction mechanisms ;
unigene_c904	KOG1609	Protein involved in mRNA turnover and stability	A	RNA processing and modification ;
unigene_c905	KOG3975	Uncharacterized conserved protein	S	Function unknown ;
unigene_c906	KOG1235	Predicted unusual protein kinase	R	General function prediction only ;
unigene_c907	KOG1839	Uncharacterized protein CLU1/cluA/TIF31 involved in mitochondrial morphology/distribution, also found associated with eIF-3	R	General function prediction only ;
unigene_c910	KOG0853	Glycosyltransferase	M	Cell wall/membrane/envelope biogenesis ;
unigene_c911	KOG0307	Vesicle coat complex COPII, subunit SEC31	U	Intracellular trafficking, secretion, and vesicular transport ;
unigene_c912	KOG1021	Acetylglucosaminyltransferase EXT1/exostosin 1	GMW	Carbohydrate transport and metabolism ; Cell wall/membrane/envelope biogenesis ; Extracellular structures ;
unigene_c913	KOG1292	Xanthine/uracil transporters	F	Nucleotide transport and metabolism ;
unigene_c914	KOG1109	Vacuole membrane protein VMP1	R	General function prediction only ;
unigene_c915	KOG3269	Predicted membrane protein	S	Function unknown ;
unigene_c917	KOG1292	Xanthine/uracil transporters	F	Nucleotide transport and metabolism ;
unigene_c919	KOG0939	E3 ubiquitin-protein ligase/Putative upstream regulatory element binding protein	OK	Posttranslational modification, protein turnover, chaperones ; Transcription ;
unigene_c922	KOG2027	Spindle pole body protein	Z	Cytoskeleton ;
unigene_c923	KOG1474	Transcription initiation factor TFIID, subunit BDF1 and related bromodomain proteins	K	Transcription ;
unigene_c924	KOG0160	Myosin class V heavy chain	Z	Cytoskeleton ;
unigene_c926	KOG2072	Translation initiation factor 3, subunit a (eIF-3a)	J	Translation, ribosomal structure and biogenesis ;
unigene_c927	KOG4265	Predicted E3 ubiquitin ligase	O	Posttranslational modification, protein turnover, chaperones ;
unigene_c929	KOG0605	NDR and related serine/threonine kinases	R	General function prediction only ;
unigene_c930	KOG1809	Vacuolar protein sorting-associated protein	U	Intracellular trafficking, secretion, and vesicular transport ;
unigene_c931	KOG0720	Molecular chaperone (DnaJ superfamily)	O	Posttranslational modification, protein turnover, chaperones ;
unigene_c936	KOG0374	Serine/threonine specific protein phosphatase PP1, catalytic subunit	TR	Signal transduction mechanisms ; General function prediction only ;
unigene_c937	KOG1021	Acetylglucosaminyltransferase EXT1/exostosin 1	GMW	Carbohydrate transport and metabolism ; Cell wall/membrane/envelope biogenesis ; Extracellular structures ;
unigene_c938	KOG0737	AAA+-type ATPase	O	Posttranslational modification, protein turnover, chaperones ;
unigene_c939	KOG1357	Serine palmitoyltransferase	O	Posttranslational modification, protein turnover, chaperones ;
unigene_c942	KOG0238	3-Methylcrotonyl-CoA carboxylase, biotin-containing subunit/Propionyl-CoA carboxylase, alpha chain/Acetyl-CoA carboxylase, biotin carboxylase subunit	IE	Lipid transport and metabolism ; Amino acid transport and metabolism ;
unigene_c944	KOG1504	Ornithine carbamoyltransferase OTC/ARG3	E	Amino acid transport and metabolism ;
unigene_c946	KOG4364	Chromatin assembly factor-I	B	Chromatin structure and dynamics ;
unigene_c948	KOG0254	Predicted transporter (major facilitator superfamily)	R	General function prediction only ;
unigene_c950	KOG2743	Cobalamin synthesis protein	H	Coenzyme transport and metabolism ;
unigene_c951	KOG3108	Single-stranded DNA-binding replication protein A (RPA), medium (30 kD) subunit	L	Replication, recombination and repair ;
unigene_c952	KOG1263	Multicopper oxidases	Q	Secondary metabolites biosynthesis, transport and catabolism ;
unigene_c954	KOG2806	Chitinase	G	Carbohydrate transport and metabolism ;
unigene_c955	KOG1426	FOG: RCC1 domain	S	Function unknown ;
unigene_c956	KOG0156	Cytochrome P450 CYP2 subfamily	Q	Secondary metabolites biosynthesis, transport and catabolism ;
unigene_c957	KOG1144	Translation initiation factor 5B (eIF-5B)	J	Translation, ribosomal structure and biogenesis ;
unigene_c958	KOG4636	Uncharacterized conserved protein with TLDc domain	S	Function unknown ;
unigene_c959	KOG2344	Exocyst component protein and related proteins	U	Intracellular trafficking, secretion, and vesicular transport ;
unigene_c960	KOG1187	Serine/threonine protein kinase	T	Signal transduction mechanisms ;
unigene_c961	KOG1308	Hsp70-interacting protein Hip/Transient component of progesterone receptor complexes and an Hsp70-binding protein	OT	Posttranslational modification, protein turnover, chaperones ; Signal transduction mechanisms ;
unigene_c962	KOG0734	AAA+-type ATPase containing the peptidase M41 domain	O	Posttranslational modification, protein turnover, chaperones ;
unigene_c963	KOG1187	Serine/threonine protein kinase	T	Signal transduction mechanisms ;
unigene_c965	KOG1863	Ubiquitin carboxyl-terminal hydrolase	O	Posttranslational modification, protein turnover, chaperones ;
unigene_c966	KOG1172	Na+-independent Cl/HCO3 exchanger AE1 and related transporters (SLC4 family)	P	Inorganic ion transport and metabolism ;
unigene_c967	KOG1327	Copine	T	Signal transduction mechanisms ;
unigene_c969	KOG2254	Predicted endo-1,3-beta-glucanase	G	Carbohydrate transport and metabolism ;
unigene_c970	KOG1187	Serine/threonine protein kinase	T	Signal transduction mechanisms ;
unigene_c971	KOG0156	Cytochrome P450 CYP2 subfamily	Q	Secondary metabolites biosynthesis, transport and catabolism ;
unigene_c972	KOG2889	Predicted PRP38-like splicing factor	S	Function unknown ;
unigene_c973	KOG2085	Serine/threonine protein phosphatase 2A, regulatory subunit	T	Signal transduction mechanisms ;
unigene_c974	KOG0048	Transcription factor, Myb superfamily	K	Transcription ;
unigene_c975	KOG2445	Nuclear pore complex component (sc Seh1)	YU	Nuclear structure ; Intracellular trafficking, secretion, and vesicular transport ;
unigene_c976	KOG0198	MEKK and related serine/threonine protein kinases	T	Signal transduction mechanisms ;
unigene_c977	KOG1079	Transcriptional repressor EZH1	K	Transcription ;
unigene_c978	KOG2491	Nuclear matrix protein	Y	Nuclear structure ;
unigene_c979	KOG1980	Uncharacterized conserved protein	S	Function unknown ;
unigene_c984	KOG1952	Transcription factor NF-X1, contains NFX-type Zn2+-binding and R3H domains	K	Transcription ;
unigene_c986	KOG2368	Hydroxymethylglutaryl-CoA lyase	CE	Energy production and conversion ; Amino acid transport and metabolism ;
unigene_c987	KOG3118	Disrupter of silencing SAS10	B	Chromatin structure and dynamics ;
unigene_c988	KOG0065	Pleiotropic drug resistance proteins (PDR1-15), ABC superfamily	Q	Secondary metabolites biosynthesis, transport and catabolism ;
unigene_c989	KOG1061	Vesicle coat complex AP-1/AP-2/AP-4, beta subunit	U	Intracellular trafficking, secretion, and vesicular transport ;
unigene_c990	KOG1050	Trehalose-6-phosphate synthase component TPS1 and related subunits	G	Carbohydrate transport and metabolism ;
unigene_c991	KOG1471	Phosphatidylinositol transfer protein SEC14 and related proteins	I	Lipid transport and metabolism ;
unigene_c992	KOG2295	C2H2 Zn-finger protein	R	General function prediction only ;
unigene_c993	KOG3012	Uncharacterized conserved protein	S	Function unknown ;
unigene_c994	KOG1476	Beta-1,3-glucuronyltransferase B3GAT1/SQV-8	O	Posttranslational modification, protein turnover, chaperones ;
unigene_c995	KOG0054	Multidrug resistance-associated protein/mitoxantrone resistance protein, ABC superfamily	Q	Secondary metabolites biosynthesis, transport and catabolism ;
unigene_c996	KOG0959	N-arginine dibasic convertase NRD1 and related Zn2+-dependent endopeptidases, insulinase superfamily	O	Posttranslational modification, protein turnover, chaperones ;
unigene_c997	KOG3242	Oligoribonuclease (3'->5' exoribonuclease)	A	RNA processing and modification ;
unigene_c998	KOG1012	Ca2+-dependent lipid-binding protein CLB1/vesicle protein vp115/Granuphilin A, contains C2 domain	R	General function prediction only ;
unigene_c999	KOG0698	Serine/threonine protein phosphatase	T	Signal transduction mechanisms ;
unigene_c1001	KOG0631	Galactokinase	G	Carbohydrate transport and metabolism ;
unigene_c1003	KOG1515	Arylacetamide deacetylase	V	Defense mechanisms ;
unigene_c1005	KOG2887	Membrane protein involved in ER to Golgi transport	U	Intracellular trafficking, secretion, and vesicular transport ;
unigene_c1006	KOG0570	Transcriptional coactivator	K	Transcription ;
unigene_c1008	KOG0946	ER-Golgi vesicle-tethering protein p115	U	Intracellular trafficking, secretion, and vesicular transport ;
unigene_c1009	KOG4270	GTPase-activator protein	T	Signal transduction mechanisms ;
unigene_c1010	KOG4197	FOG: PPR repeat	R	General function prediction only ;
unigene_c1011	KOG2606	OTU (ovarian tumor)-like cysteine protease	TO	Signal transduction mechanisms ; Posttranslational modification, protein turnover, chaperones ;
unigene_c1012	KOG0160	Myosin class V heavy chain	Z	Cytoskeleton ;
unigene_c1015	KOG1282	Serine carboxypeptidases (lysosomal cathepsin A)	OE	Posttranslational modification, protein turnover, chaperones ; Amino acid transport and metabolism ;
unigene_c1016	KOG0032	Ca2+/calmodulin-dependent protein kinase, EF-Hand protein superfamily	T	Signal transduction mechanisms ;
unigene_c1017	KOG4282	Transcription factor GT-2 and related proteins, contains trihelix DNA-binding/SANT domain	K	Transcription ;
unigene_c1019	KOG1192	UDP-glucuronosyl and UDP-glucosyl transferase	GC	Carbohydrate transport and metabolism ; Energy production and conversion ;
unigene_c1020	KOG1327	Copine	T	Signal transduction mechanisms ;
unigene_c1021	KOG1187	Serine/threonine protein kinase	T	Signal transduction mechanisms ;
unigene_c1023	KOG1043	Ca2+-binding transmembrane protein LETM1/MRS7	S	Function unknown ;
unigene_c1024	KOG0626	Beta-glucosidase, lactase phlorizinhydrolase, and related proteins	G	Carbohydrate transport and metabolism ;
unigene_c1025	KOG2352	Predicted spermine/spermidine synthase	E	Amino acid transport and metabolism ;
unigene_c1026	KOG0663	Protein kinase PITSLRE and related kinases	R	General function prediction only ;
unigene_c1027	KOG1959	Glycosyl hydrolase, family 38 - alpha-mannosidase	G	Carbohydrate transport and metabolism ;
unigene_c1028	KOG1999	RNA polymerase II transcription elongation factor DSIF/SUPT5H/SPT5	K	Transcription ;
unigene_c1030	KOG2415	Electron transfer flavoprotein ubiquinone oxidoreductase	C	Energy production and conversion ;
unigene_c1031	KOG1041	Translation initiation factor 2C (eIF-2C) and related proteins	J	Translation, ribosomal structure and biogenesis ;
unigene_c1032	KOG1291	Mn2+ and Fe2+ transporters of the NRAMP family	P	Inorganic ion transport and metabolism ;
unigene_c1034	KOG0398	Mitochondrial/chloroplast ribosomal protein L5/L7	J	Translation, ribosomal structure and biogenesis ;
unigene_c1035	KOG2446	Glucose-6-phosphate isomerase	G	Carbohydrate transport and metabolism ;
unigene_c1037	KOG0266	WD40 repeat-containing protein	R	General function prediction only ;
unigene_c1038	KOG0779	Protease, Ulp1 family	O	Posttranslational modification, protein turnover, chaperones ;
unigene_c1039	KOG2244	Highly conserved protein containing a thioredoxin domain	R	General function prediction only ;
unigene_c1041	KOG1320	Serine protease	O	Posttranslational modification, protein turnover, chaperones ;
unigene_c1042	KOG0399	Glutamate synthase	E	Amino acid transport and metabolism ;
unigene_c1045	KOG1260	Isocitrate lyase	C	Energy production and conversion ;
unigene_c1046	KOG2306	Uncharacterized conserved protein	S	Function unknown ;
unigene_c1050	KOG2139	WD40 repeat protein	R	General function prediction only ;
unigene_c1052	KOG1385	Nucleoside phosphatase	F	Nucleotide transport and metabolism ;
unigene_c1053	KOG1601	GATA-4/5/6 transcription factors	K	Transcription ;
unigene_c1054	KOG1337	N-methyltransferase	R	General function prediction only ;
unigene_c1055	KOG0157	Cytochrome P450 CYP4/CYP19/CYP26 subfamilies	QI	Secondary metabolites biosynthesis, transport and catabolism ; Lipid transport and metabolism ;
unigene_c1056	KOG1363	Predicted regulator of the ubiquitin pathway (contains UAS and UBX domains)	T	Signal transduction mechanisms ;
unigene_c1058	KOG0161	Myosin class II heavy chain	Z	Cytoskeleton ;
unigene_c1060	KOG1375	Beta tubulin	Z	Cytoskeleton ;
unigene_c1061	KOG0649	WD40 repeat protein	R	General function prediction only ;
unigene_c1062	KOG0415	Predicted peptidyl prolyl cis-trans isomerase	O	Posttranslational modification, protein turnover, chaperones ;
unigene_c1063	KOG0998	Synaptic vesicle protein EHS-1 and related EH domain proteins	TU	Signal transduction mechanisms ; Intracellular trafficking, secretion, and vesicular transport ;
unigene_c1066	KOG0520	Uncharacterized conserved protein, contains IPT/TIG domain	S	Function unknown ;
unigene_c1067	KOG1156	N-terminal acetyltransferase	B	Chromatin structure and dynamics ;
unigene_c1068	KOG2273	Membrane coat complex Retromer, subunit VPS5/SNX1, Sorting nexins, and related PX domain-containing proteins	U	Intracellular trafficking, secretion, and vesicular transport ;
unigene_c1069	KOG1521	RNA polymerase I and III, subunit RPA40/RPC40	K	Transcription ;
unigene_c1070	KOG4780	Uncharacterized conserved protein	S	Function unknown ;
unigene_c1071	KOG4569	Predicted lipase	I	Lipid transport and metabolism ;
unigene_c1072	KOG0800	FOG: Predicted E3 ubiquitin ligase	O	Posttranslational modification, protein turnover, chaperones ;
unigene_c1073	KOG0027	Calmodulin and related proteins (EF-Hand superfamily)	T	Signal transduction mechanisms ;
unigene_c1074	KOG1187	Serine/threonine protein kinase	T	Signal transduction mechanisms ;
unigene_c1075	KOG2127	Calmodulin-binding protein CRAG, contains DENN domain	T	Signal transduction mechanisms ;
unigene_c1076	KOG0244	Kinesin-like protein	Z	Cytoskeleton ;
unigene_c1077	KOG0939	E3 ubiquitin-protein ligase/Putative upstream regulatory element binding protein	OK	Posttranslational modification, protein turnover, chaperones ; Transcription ;
unigene_c1078	KOG1622	GMP synthase	F	Nucleotide transport and metabolism ;
unigene_c1080	KOG1187	Serine/threonine protein kinase	T	Signal transduction mechanisms ;
unigene_c1081	KOG0620	Glucose-repressible alcohol dehydrogenase transcriptional effector CCR4 and related proteins	K	Transcription ;
unigene_c1082	KOG1098	Putative SAM-dependent rRNA methyltransferase SPB1	AR	RNA processing and modification ; General function prediction only ;
unigene_c1083	KOG1339	Aspartyl protease	O	Posttranslational modification, protein turnover, chaperones ;
unigene_c1084	KOG1703	Adaptor protein Enigma and related PDZ-LIM proteins	TZ	Signal transduction mechanisms ; Cytoskeleton ;
unigene_c1085	KOG1940	Zn-finger protein	R	General function prediction only ;
unigene_c1087	KOG0120	Splicing factor U2AF, large subunit (RRM superfamily)	A	RNA processing and modification ;
unigene_c1088	KOG0583	Serine/threonine protein kinase	T	Signal transduction mechanisms ;
unigene_c1091	KOG1278	Endosomal membrane proteins, EMP70	U	Intracellular trafficking, secretion, and vesicular transport ;
unigene_c1092	KOG0198	MEKK and related serine/threonine protein kinases	T	Signal transduction mechanisms ;
unigene_c1093	KOG0054	Multidrug resistance-associated protein/mitoxantrone resistance protein, ABC superfamily	Q	Secondary metabolites biosynthesis, transport and catabolism ;
unigene_c1094	KOG0301	Phospholipase A2-activating protein (contains WD40 repeats)	I	Lipid transport and metabolism ;
unigene_c1095	KOG1187	Serine/threonine protein kinase	T	Signal transduction mechanisms ;
unigene_c1097	KOG1347	Uncharacterized membrane protein, predicted efflux pump	R	General function prediction only ;
unigene_c1099	KOG2245	Poly(A) polymerase and related nucleotidyltransferases	A	RNA processing and modification ;
unigene_c1100	KOG2521	Uncharacterized conserved protein	S	Function unknown ;
unigene_c1104	KOG2118	Predicted membrane protein, contains two CBS domains	S	Function unknown ;
unigene_c1105	KOG2633	Hismacro and SEC14 domain-containing proteins	BK	Chromatin structure and dynamics ; Transcription ;
unigene_c1106	KOG0057	Mitochondrial Fe/S cluster exporter, ABC superfamily	U	Intracellular trafficking, secretion, and vesicular transport ;
unigene_c1107	KOG1243	Protein kinase	R	General function prediction only ;
unigene_c1108	KOG0962	DNA repair protein RAD50, ABC-type ATPase/SMC superfamily	L	Replication, recombination and repair ;
unigene_c1109	KOG0198	MEKK and related serine/threonine protein kinases	T	Signal transduction mechanisms ;
unigene_c1110	KOG0504	FOG: Ankyrin repeat	R	General function prediction only ;
unigene_c1112	KOG1278	Endosomal membrane proteins, EMP70	U	Intracellular trafficking, secretion, and vesicular transport ;
unigene_c1113	KOG1118	Lysophosphatidic acid acyltransferase endophilin/SH3GL, involved in synaptic vesicle formation	IT	Lipid transport and metabolism ; Signal transduction mechanisms ;
unigene_c1114	KOG1256	Long-chain acyl-CoA synthetases (AMP-forming)	I	Lipid transport and metabolism ;
unigene_c1118	KOG2451	Aldehyde dehydrogenase	C	Energy production and conversion ;
unigene_c1119	KOG1082	Histone H3 (Lys9) methyltransferase SUV39H1/Clr4, required for transcriptional silencing	BK	Chromatin structure and dynamics ; Transcription ;
unigene_c1120	KOG2127	Calmodulin-binding protein CRAG, contains DENN domain	T	Signal transduction mechanisms ;
unigene_c1121	KOG1528	Salt-sensitive 3'-phosphoadenosine-5'-phosphatase HAL2/SAL1	FP	Nucleotide transport and metabolism ; Inorganic ion transport and metabolism ;
unigene_c1122	KOG1238	Glucose dehydrogenase/choline dehydrogenase/mandelonitrile lyase (GMC oxidoreductase family)	R	General function prediction only ;
unigene_c1123	KOG0511	Ankyrin repeat protein	R	General function prediction only ;
unigene_c1125	KOG0498	K+-channel ERG and related proteins, contain PAS/PAC sensor domain	PT	Inorganic ion transport and metabolism ; Signal transduction mechanisms ;
unigene_c1126	KOG0254	Predicted transporter (major facilitator superfamily)	R	General function prediction only ;
unigene_c1127	KOG1282	Serine carboxypeptidases (lysosomal cathepsin A)	OE	Posttranslational modification, protein turnover, chaperones ; Amino acid transport and metabolism ;
unigene_c1128	KOG4416	Uncharacterized conserved protein	S	Function unknown ;
unigene_c1130	KOG0151	Predicted splicing regulator, contains RRM, SWAP and RPR domains	R	General function prediction only ;
unigene_c1131	KOG0172	Lysine-ketoglutarate reductase/saccharopine dehydrogenase	E	Amino acid transport and metabolism ;
unigene_c1132	KOG0922	DEAH-box RNA helicase	A	RNA processing and modification ;
unigene_c1133	KOG1311	DHHC-type Zn-finger proteins	R	General function prediction only ;
unigene_c1134	KOG0297	TNF receptor-associated factor	T	Signal transduction mechanisms ;
unigene_c1135	KOG2248	3'-5' exonuclease	L	Replication, recombination and repair ;
unigene_c1136	KOG0504	FOG: Ankyrin repeat	R	General function prediction only ;
unigene_c1139	KOG1051	Chaperone HSP104 and related ATP-dependent Clp proteases	O	Posttranslational modification, protein turnover, chaperones ;
unigene_c1140	KOG1986	Vesicle coat complex COPII, subunit SEC23	U	Intracellular trafficking, secretion, and vesicular transport ;
unigene_c1141	KOG0927	Predicted transporter (ABC superfamily)	R	General function prediction only ;
unigene_c1145	KOG2590	RNA-binding protein LARP/SRO9 and related La domain proteins	OJ	Posttranslational modification, protein turnover, chaperones ; Translation, ribosomal structure and biogenesis ;
unigene_c1146	KOG2325	Predicted transporter/transmembrane protein	R	General function prediction only ;
unigene_c1147	KOG2148	Exocyst protein Sec3	U	Intracellular trafficking, secretion, and vesicular transport ;
unigene_c1148	KOG1987	Speckle-type POZ protein SPOP and related proteins with TRAF, MATH and BTB/POZ domains	DR	Cell cycle control, cell division, chromosome partitioning ; General function prediction only ;
unigene_c1150	KOG2258	Glycerophosphoryl diester phosphodiesterase	C	Energy production and conversion ;
unigene_c1151	KOG2622	Putative myrosinase precursor	V	Defense mechanisms ;
unigene_c1152	KOG4176	Uncharacterized conserved protein	S	Function unknown ;
unigene_c1153	KOG0583	Serine/threonine protein kinase	T	Signal transduction mechanisms ;
unigene_c1154	KOG1342	Histone deacetylase complex, catalytic component RPD3	B	Chromatin structure and dynamics ;
unigene_c1155	KOG1030	Predicted Ca2+-dependent phospholipid-binding protein	R	General function prediction only ;
unigene_c1156	KOG2484	GTPase	R	General function prediction only ;
unigene_c1158	KOG1441	Glucose-6-phosphate/phosphate and phosphoenolpyruvate/phosphate antiporter	GE	Carbohydrate transport and metabolism ; Amino acid transport and metabolism ;
unigene_c1159	KOG2670	Enolase	G	Carbohydrate transport and metabolism ;
unigene_c1160	KOG1965	Sodium/hydrogen exchanger protein	P	Inorganic ion transport and metabolism ;
unigene_c1161	KOG4197	FOG: PPR repeat	R	General function prediction only ;
unigene_c1162	KOG0521	Putative GTPase activating proteins (GAPs)	T	Signal transduction mechanisms ;
unigene_c1163	KOG1322	GDP-mannose pyrophosphorylase/mannose-1-phosphate guanylyltransferase	M	Cell wall/membrane/envelope biogenesis ;
unigene_c1165	KOG0737	AAA+-type ATPase	O	Posttranslational modification, protein turnover, chaperones ;
unigene_c1167	KOG4372	Predicted alpha/beta hydrolase	R	General function prediction only ;
unigene_c1168	KOG0985	Vesicle coat protein clathrin, heavy chain	U	Intracellular trafficking, secretion, and vesicular transport ;
unigene_c1169	KOG2536	MAM33, mitochondrial matrix glycoprotein	C	Energy production and conversion ;
unigene_c1170	KOG2166	Cullins	D	Cell cycle control, cell division, chromosome partitioning ;
unigene_c1171	KOG0292	Vesicle coat complex COPI, alpha subunit	U	Intracellular trafficking, secretion, and vesicular transport ;
unigene_c1174	KOG0149	Predicted RNA-binding protein SEB4 (RRM superfamily)	R	General function prediction only ;
unigene_c1176	KOG0118	FOG: RRM domain	R	General function prediction only ;
unigene_c1177	KOG0610	Putative serine/threonine protein kinase	R	General function prediction only ;
unigene_c1178	KOG1975	mRNA cap methyltransferase	A	RNA processing and modification ;
unigene_c1180	KOG1208	Dehydrogenases with different specificities (related to short-chain alcohol dehydrogenases)	Q	Secondary metabolites biosynthesis, transport and catabolism ;
unigene_c1181	KOG2797	Prephenate dehydratase	E	Amino acid transport and metabolism ;
unigene_c1182	KOG0658	Glycogen synthase kinase-3	G	Carbohydrate transport and metabolism ;
unigene_c1183	KOG1861	Leucine permease transcriptional regulator	K	Transcription ;
unigene_c1185	KOG1298	Squalene monooxygenase	I	Lipid transport and metabolism ;
unigene_c1187	KOG0714	Molecular chaperone (DnaJ superfamily)	O	Posttranslational modification, protein turnover, chaperones ;
unigene_c1188	KOG2262	Sexual differentiation process protein ISP4	T	Signal transduction mechanisms ;
unigene_c1190	KOG0025	Zn2+-binding dehydrogenase (nuclear receptor binding factor-1)	KC	Transcription ; Energy production and conversion ;
unigene_c1191	KOG4161	Methyl-CpG binding transcription regulators	KB	Transcription ; Chromatin structure and dynamics ;
unigene_c1192	KOG1474	Transcription initiation factor TFIID, subunit BDF1 and related bromodomain proteins	K	Transcription ;
unigene_c1193	KOG4569	Predicted lipase	I	Lipid transport and metabolism ;
unigene_c1195	KOG2644	3'-phosphoadenosine 5'-phosphosulfate sulfotransferase (PAPS reductase)/FAD synthetase and related enzymes	EH	Amino acid transport and metabolism ; Coenzyme transport and metabolism ;
unigene_c1196	KOG2100	Dipeptidyl aminopeptidase	O	Posttranslational modification, protein turnover, chaperones ;
unigene_c1197	KOG0266	WD40 repeat-containing protein	R	General function prediction only ;
unigene_c1198	KOG2322	N-methyl-D-aspartate receptor glutamate-binding subunit	T	Signal transduction mechanisms ;
unigene_c1200	KOG2296	Integral membrane protein	R	General function prediction only ;
unigene_c1201	KOG1843	Uncharacterized conserved protein	S	Function unknown ;
unigene_c1202	KOG0975	Branched chain aminotransferase BCAT1, pyridoxal phosphate enzymes type IV superfamily	E	Amino acid transport and metabolism ;
unigene_c1204	KOG3150	Uncharacterized conserved protein	S	Function unknown ;
unigene_c1206	KOG2376	Signal recognition particle, subunit Srp72	U	Intracellular trafficking, secretion, and vesicular transport ;
unigene_c1208	KOG0621	Phospholipid scramblase	M	Cell wall/membrane/envelope biogenesis ;
unigene_c1209	KOG0619	FOG: Leucine rich repeat	R	General function prediction only ;
unigene_c1211	KOG1162	Predicted small molecule transporter	U	Intracellular trafficking, secretion, and vesicular transport ;
unigene_c1212	KOG3079	Uridylate kinase/adenylate kinase	F	Nucleotide transport and metabolism ;
unigene_c1213	KOG1187	Serine/threonine protein kinase	T	Signal transduction mechanisms ;
unigene_c1214	KOG4673	Transcription factor TMF, TATA element modulatory factor	K	Transcription ;
unigene_c1215	KOG0316	Conserved WD40 repeat-containing protein	S	Function unknown ;
unigene_c1216	KOG0455	Homoserine dehydrogenase	E	Amino acid transport and metabolism ;
unigene_c1217	KOG2803	Choline phosphate cytidylyltransferase/Predicted CDP-ethanolamine synthase	I	Lipid transport and metabolism ;
unigene_c1218	KOG1105	Transcription elongation factor TFIIS/Cofactor of enhancer-binding protein Sp1	K	Transcription ;
unigene_c1219	KOG1332	Vesicle coat complex COPII, subunit SEC13	U	Intracellular trafficking, secretion, and vesicular transport ;
unigene_c1220	KOG2220	Predicted signal transduction protein	R	General function prediction only ;
unigene_c1222	KOG4532	WD40-like repeat containing protein	R	General function prediction only ;
unigene_c1224	KOG4471	Phosphatidylinositol 3-phosphate 3-phosphatase myotubularin MTM1	IU	Lipid transport and metabolism ; Intracellular trafficking, secretion, and vesicular transport ;
unigene_c1226	KOG0116	RasGAP SH3 binding protein rasputin, contains NTF2 and RRM domains	T	Signal transduction mechanisms ;
unigene_c1227	KOG1019	Retinoblastoma pathway protein LIN-9/chromatin-associated protein Aly	BDT	Chromatin structure and dynamics ; Cell cycle control, cell division, chromosome partitioning ; Signal transduction mechanisms ;
unigene_c1228	KOG1335	Dihydrolipoamide dehydrogenase	C	Energy production and conversion ;
unigene_c1229	KOG0465	Mitochondrial elongation factor	J	Translation, ribosomal structure and biogenesis ;
unigene_c1230	KOG1697	Mitochondrial/chloroplast ribosomal protein S9	J	Translation, ribosomal structure and biogenesis ;
unigene_c1231	KOG0324	Uncharacterized conserved protein	S	Function unknown ;
unigene_c1232	KOG4443	Putative transcription factor HALR/MLL3, involved in embryonic development	R	General function prediction only ;
unigene_c1233	KOG0061	Transporter, ABC superfamily (Breast cancer resistance protein)	Q	Secondary metabolites biosynthesis, transport and catabolism ;
unigene_c1234	KOG1659	Class 2 transcription repressor NC2, alpha subunit (DRAP1)	K	Transcription ;
unigene_c1235	KOG2814	Transcription coactivator complex, P50 component (LigT RNA ligase/phosphodiesterase family)	K	Transcription ;
unigene_c1237	KOG1975	mRNA cap methyltransferase	A	RNA processing and modification ;
unigene_c1238	KOG0773	Transcription factor MEIS1 and related HOX domain proteins	K	Transcription ;
unigene_c1239	KOG1601	GATA-4/5/6 transcription factors	K	Transcription ;
unigene_c1240	KOG2532	Permease of the major facilitator superfamily	G	Carbohydrate transport and metabolism ;
unigene_c1241	KOG2137	Protein kinase	T	Signal transduction mechanisms ;
unigene_c1244	KOG2688	Transcription-associated recombination protein - Thp1p	D	Cell cycle control, cell division, chromosome partitioning ;
unigene_c1245	KOG1379	Serine/threonine protein phosphatase	T	Signal transduction mechanisms ;
unigene_c1246	KOG0292	Vesicle coat complex COPI, alpha subunit	U	Intracellular trafficking, secretion, and vesicular transport ;
unigene_c1247	KOG0600	Cdc2-related protein kinase	D	Cell cycle control, cell division, chromosome partitioning ;
unigene_c1248	KOG0169	Phosphoinositide-specific phospholipase C	T	Signal transduction mechanisms ;
unigene_c1249	KOG1246	DNA-binding protein jumonji/RBP2/SMCY, contains JmjC domain	R	General function prediction only ;
unigene_c1251	KOG2289	Rhomboid family proteins	T	Signal transduction mechanisms ;
unigene_c1254	KOG1984	Vesicle coat complex COPII, subunit SFB3	U	Intracellular trafficking, secretion, and vesicular transport ;
unigene_c1255	KOG0929	Guanine nucleotide exchange factor	U	Intracellular trafficking, secretion, and vesicular transport ;
unigene_c1256	KOG1525	Sister chromatid cohesion complex Cohesin, subunit PDS5	D	Cell cycle control, cell division, chromosome partitioning ;
unigene_c1259	KOG1516	Carboxylesterase and related proteins	R	General function prediction only ;
unigene_c1260	KOG0865	Cyclophilin type peptidyl-prolyl cis-trans isomerase	O	Posttranslational modification, protein turnover, chaperones ;
unigene_c1262	KOG0247	Kinesin-like protein	Z	Cytoskeleton ;
unigene_c1263	KOG1870	Ubiquitin C-terminal hydrolase	O	Posttranslational modification, protein turnover, chaperones ;
unigene_c1264	KOG2164	Predicted E3 ubiquitin ligase	O	Posttranslational modification, protein turnover, chaperones ;
unigene_c1265	KOG1187	Serine/threonine protein kinase	T	Signal transduction mechanisms ;
unigene_c1266	KOG2395	Protein involved in vacuole import and degradation	U	Intracellular trafficking, secretion, and vesicular transport ;
unigene_c1268	KOG3245	Uncharacterized conserved protein	S	Function unknown ;
unigene_c1270	KOG0266	WD40 repeat-containing protein	R	General function prediction only ;
unigene_c1271	KOG1984	Vesicle coat complex COPII, subunit SFB3	U	Intracellular trafficking, secretion, and vesicular transport ;
unigene_c1272	KOG2992	Nucleolar GTPase/ATPase p130	Y	Nuclear structure ;
unigene_c1273	KOG2085	Serine/threonine protein phosphatase 2A, regulatory subunit	T	Signal transduction mechanisms ;
unigene_c1274	KOG1263	Multicopper oxidases	Q	Secondary metabolites biosynthesis, transport and catabolism ;
unigene_c1275	KOG2207	Predicted 3'-5' exonuclease	L	Replication, recombination and repair ;
unigene_c1276	KOG0118	FOG: RRM domain	R	General function prediction only ;
unigene_c1280	KOG0118	FOG: RRM domain	R	General function prediction only ;
unigene_c1282	KOG0692	Pentafunctional AROM protein	E	Amino acid transport and metabolism ;
unigene_c1283	KOG4840	Predicted hydrolases or acyltransferases (alpha/beta hydrolase superfamily)	R	General function prediction only ;
unigene_c1284	KOG1947	Leucine rich repeat proteins, some proteins contain F-box	R	General function prediction only ;
unigene_c1285	KOG0143	Iron/ascorbate family oxidoreductases	QR	Secondary metabolites biosynthesis, transport and catabolism ; General function prediction only ;
unigene_c1286	KOG1061	Vesicle coat complex AP-1/AP-2/AP-4, beta subunit	U	Intracellular trafficking, secretion, and vesicular transport ;
unigene_c1287	KOG1431	GDP-L-fucose synthetase	GO	Carbohydrate transport and metabolism ; Posttranslational modification, protein turnover, chaperones ;
unigene_c1288	KOG1105	Transcription elongation factor TFIIS/Cofactor of enhancer-binding protein Sp1	K	Transcription ;
unigene_c1289	KOG0406	Glutathione S-transferase	O	Posttranslational modification, protein turnover, chaperones ;
unigene_c1290	KOG2718	Na+-bile acid cotransporter	P	Inorganic ion transport and metabolism ;
unigene_c1291	KOG1696	60s ribosomal protein L19	J	Translation, ribosomal structure and biogenesis ;
unigene_c1292	KOG0326	ATP-dependent RNA helicase	A	RNA processing and modification ;
unigene_c1294	KOG0384	Chromodomain-helicase DNA-binding protein	K	Transcription ;
unigene_c1295	KOG1001	Helicase-like transcription factor HLTF/DNA helicase RAD5, DEAD-box superfamily	KL	Transcription ; Replication, recombination and repair ;
unigene_c1296	KOG0605	NDR and related serine/threonine kinases	R	General function prediction only ;
unigene_c1297	KOG0106	Alternative splicing factor SRp55/B52/SRp75 (RRM superfamily)	A	RNA processing and modification ;
unigene_c1298	KOG0692	Pentafunctional AROM protein	E	Amino acid transport and metabolism ;
unigene_c1299	KOG0955	PHD finger protein BR140/LIN-49	R	General function prediction only ;
unigene_c1301	KOG0631	Galactokinase	G	Carbohydrate transport and metabolism ;
unigene_c1302	KOG4467	Uncharacterized conserved protein	S	Function unknown ;
unigene_c1303	KOG2726	Mitochondrial polypeptide chain release factor	J	Translation, ribosomal structure and biogenesis ;
unigene_c1304	KOG1665	AFH1-interacting protein FIP2, contains BTB/POZ domain and pentapeptide repeats	R	General function prediction only ;
unigene_c1306	KOG1012	Ca2+-dependent lipid-binding protein CLB1/vesicle protein vp115/Granuphilin A, contains C2 domain	R	General function prediction only ;
unigene_c1309	KOG4155	FOG: WD40 repeat	R	General function prediction only ;
unigene_c1310	KOG4569	Predicted lipase	I	Lipid transport and metabolism ;
unigene_c1311	KOG2136	Transcriptional regulators binding to the GC-rich sequences	K	Transcription ;
unigene_c1312	KOG2229	Protein required for actin cytoskeleton organization and cell cycle progression	DZ	Cell cycle control, cell division, chromosome partitioning ; Cytoskeleton ;
unigene_c1314	KOG0714	Molecular chaperone (DnaJ superfamily)	O	Posttranslational modification, protein turnover, chaperones ;
unigene_c1315	KOG0619	FOG: Leucine rich repeat	R	General function prediction only ;
unigene_c1316	KOG1187	Serine/threonine protein kinase	T	Signal transduction mechanisms ;
unigene_c1317	KOG0670	U4/U6-associated splicing factor PRP4	A	RNA processing and modification ;
unigene_c1319	KOG2760	Vacuolar sorting protein VPS36	U	Intracellular trafficking, secretion, and vesicular transport ;
unigene_c1320	KOG0273	Beta-transducin family (WD-40 repeat) protein	B	Chromatin structure and dynamics ;
unigene_c1321	KOG3351	Predicted nucleotidyltransferase	R	General function prediction only ;
unigene_c1322	KOG2952	Cell cycle control protein	DKT	Cell cycle control, cell division, chromosome partitioning ; Transcription ; Signal transduction mechanisms ;
unigene_c1323	KOG2662	Magnesium transporters: CorA family	P	Inorganic ion transport and metabolism ;
unigene_c1325	KOG1208	Dehydrogenases with different specificities (related to short-chain alcohol dehydrogenases)	Q	Secondary metabolites biosynthesis, transport and catabolism ;
unigene_c1327	KOG1481	Cysteine synthase	E	Amino acid transport and metabolism ;
unigene_c1328	KOG0228	Beta-fructofuranosidase (invertase)	G	Carbohydrate transport and metabolism ;
unigene_c1330	KOG2167	Cullins	D	Cell cycle control, cell division, chromosome partitioning ;
unigene_c1332	KOG1211	Amidases	J	Translation, ribosomal structure and biogenesis ;
unigene_c1333	KOG3286	Selenoprotein T	R	General function prediction only ;
unigene_c1334	KOG0032	Ca2+/calmodulin-dependent protein kinase, EF-Hand protein superfamily	T	Signal transduction mechanisms ;
unigene_c1338	KOG3869	Uncharacterized conserved protein	S	Function unknown ;
unigene_c1339	KOG2500	Uncharacterized conserved protein	S	Function unknown ;
unigene_c1340	KOG0946	ER-Golgi vesicle-tethering protein p115	U	Intracellular trafficking, secretion, and vesicular transport ;
unigene_c1342	KOG0118	FOG: RRM domain	R	General function prediction only ;
unigene_c1343	KOG0715	Molecular chaperone (DnaJ superfamily)	O	Posttranslational modification, protein turnover, chaperones ;
unigene_c1344	KOG0254	Predicted transporter (major facilitator superfamily)	R	General function prediction only ;
unigene_c1345	KOG1888	Putative phosphoinositide phosphatase	I	Lipid transport and metabolism ;
unigene_c1346	KOG3066	Translin-associated protein X	R	General function prediction only ;
unigene_c1347	KOG0498	K+-channel ERG and related proteins, contain PAS/PAC sensor domain	PT	Inorganic ion transport and metabolism ; Signal transduction mechanisms ;
unigene_c1348	KOG2235	Uncharacterized conserved protein	S	Function unknown ;
unigene_c1349	KOG1839	Uncharacterized protein CLU1/cluA/TIF31 involved in mitochondrial morphology/distribution, also found associated with eIF-3	R	General function prediction only ;
unigene_c1350	KOG0017	FOG: Transposon-encoded proteins with TYA, reverse transcriptase, integrase domains in various combinations	R	General function prediction only ;
unigene_c1351	KOG0058	Peptide exporter, ABC superfamily	U	Intracellular trafficking, secretion, and vesicular transport ;
unigene_c1354	KOG3003	Molecular chaperone of the GrpE family	O	Posttranslational modification, protein turnover, chaperones ;
unigene_c1355	KOG4161	Methyl-CpG binding transcription regulators	KB	Transcription ; Chromatin structure and dynamics ;
unigene_c1356	KOG2344	Exocyst component protein and related proteins	U	Intracellular trafficking, secretion, and vesicular transport ;
unigene_c1358	KOG1571	Predicted E3 ubiquitin ligase	O	Posttranslational modification, protein turnover, chaperones ;
unigene_c1360	KOG0916	1,3-beta-glucan synthase/callose synthase catalytic subunit	M	Cell wall/membrane/envelope biogenesis ;
unigene_c1362	KOG0236	Sulfate/bicarbonate/oxalate exchanger SAT-1 and related transporters (SLC26 family)	P	Inorganic ion transport and metabolism ;
unigene_c1363	KOG0835	Cyclin L	R	General function prediction only ;
unigene_c1364	KOG1619	Cytochrome b	C	Energy production and conversion ;
unigene_c1365	KOG2323	Pyruvate kinase	G	Carbohydrate transport and metabolism ;
unigene_c1368	KOG2569	G protein-coupled seven transmembrane receptor	T	Signal transduction mechanisms ;
unigene_c1369	KOG1030	Predicted Ca2+-dependent phospholipid-binding protein	R	General function prediction only ;
unigene_c1372	KOG4197	FOG: PPR repeat	R	General function prediction only ;
unigene_c1373	KOG1192	UDP-glucuronosyl and UDP-glucosyl transferase	GC	Carbohydrate transport and metabolism ; Energy production and conversion ;
unigene_c1374	KOG1075	FOG: Reverse transcriptase	R	General function prediction only ;
unigene_c1375	KOG1684	Enoyl-CoA hydratase	I	Lipid transport and metabolism ;
unigene_c1377	KOG0228	Beta-fructofuranosidase (invertase)	G	Carbohydrate transport and metabolism ;
unigene_c1379	KOG4204	Histone deacetylase complex, SIN3 component	B	Chromatin structure and dynamics ;
unigene_c1380	KOG1438	Anthranilate phosphoribosyltransferase	E	Amino acid transport and metabolism ;
unigene_c1381	KOG0730	AAA+-type ATPase	O	Posttranslational modification, protein turnover, chaperones ;
unigene_c1383	KOG1946	RNA polymerase I transcription factor UAF	K	Transcription ;
unigene_c1384	KOG1050	Trehalose-6-phosphate synthase component TPS1 and related subunits	G	Carbohydrate transport and metabolism ;
unigene_c1385	KOG0167	FOG: Armadillo/beta-catenin-like repeats	S	Function unknown ;
unigene_c1387	KOG0632	Phytochelatin synthase	P	Inorganic ion transport and metabolism ;
unigene_c1388	KOG2474	Zinc transporter and related ZIP domain-containing proteins	P	Inorganic ion transport and metabolism ;
unigene_c1390	KOG1541	Predicted protein carboxyl methylase	R	General function prediction only ;
unigene_c1394	KOG0063	RNAse L inhibitor, ABC superfamily	A	RNA processing and modification ;
unigene_c1395	KOG1888	Putative phosphoinositide phosphatase	I	Lipid transport and metabolism ;
unigene_c1398	KOG1845	MORC family ATPases	D	Cell cycle control, cell division, chromosome partitioning ;
unigene_c1401	KOG0431	Auxilin-like protein and related proteins containing DnaJ domain	R	General function prediction only ;
unigene_c1402	KOG0619	FOG: Leucine rich repeat	R	General function prediction only ;
unigene_c1403	KOG1795	U5 snRNP spliceosome subunit	A	RNA processing and modification ;
unigene_c1404	KOG1343	Histone deacetylase complex, catalytic component HDA1	B	Chromatin structure and dynamics ;
unigene_c1405	KOG1863	Ubiquitin carboxyl-terminal hydrolase	O	Posttranslational modification, protein turnover, chaperones ;
unigene_c1406	KOG1187	Serine/threonine protein kinase	T	Signal transduction mechanisms ;
unigene_c1407	KOG1378	Purple acid phosphatase	G	Carbohydrate transport and metabolism ;
unigene_c1408	KOG0800	FOG: Predicted E3 ubiquitin ligase	O	Posttranslational modification, protein turnover, chaperones ;
unigene_c1409	KOG2692	Sialyltransferase	G	Carbohydrate transport and metabolism ;
unigene_c1411	KOG0065	Pleiotropic drug resistance proteins (PDR1-15), ABC superfamily	Q	Secondary metabolites biosynthesis, transport and catabolism ;
unigene_c1413	KOG0212	Uncharacterized conserved protein	S	Function unknown ;
unigene_c1415	KOG1329	Phospholipase D1	I	Lipid transport and metabolism ;
unigene_c1416	KOG1184	Thiamine pyrophosphate-requiring enzyme	EH	Amino acid transport and metabolism ; Coenzyme transport and metabolism ;
unigene_c1419	KOG0103	Molecular chaperones HSP105/HSP110/SSE1, HSP70 superfamily	O	Posttranslational modification, protein turnover, chaperones ;
unigene_c1420	KOG0800	FOG: Predicted E3 ubiquitin ligase	O	Posttranslational modification, protein turnover, chaperones ;
unigene_c1421	KOG0619	FOG: Leucine rich repeat	R	General function prediction only ;
unigene_c1423	KOG0584	Serine/threonine protein kinase	R	General function prediction only ;
unigene_c1424	KOG0535	Sulfite oxidase, molybdopterin-binding component	C	Energy production and conversion ;
unigene_c1425	KOG0659	Cdk activating kinase (CAK)/RNA polymerase II transcription initiation/nucleotide excision repair factor TFIIH/TFIIK, kinase subunit CDK7	DKL	Cell cycle control, cell division, chromosome partitioning ; Transcription ; Replication, recombination and repair ;
unigene_c1427	KOG4561	Uncharacterized conserved protein, contains TBC domain	TR	Signal transduction mechanisms ; General function prediction only ;
unigene_c1428	KOG3088	Secretory carrier membrane protein	U	Intracellular trafficking, secretion, and vesicular transport ;
unigene_c1429	KOG4677	Golgi integral membrane protein	UR	Intracellular trafficking, secretion, and vesicular transport ; General function prediction only ;
unigene_c1431	KOG2921	Intramembrane metalloprotease (sterol-regulatory element-binding protein (SREBP) protease)	O	Posttranslational modification, protein turnover, chaperones ;
unigene_c1432	KOG0496	Beta-galactosidase	G	Carbohydrate transport and metabolism ;
unigene_c1433	KOG0192	Tyrosine kinase specific for activated (GTP-bound) p21cdc42Hs	T	Signal transduction mechanisms ;
unigene_c1434	KOG3855	Monooxygenase involved in coenzyme Q (ubiquinone) biosynthesis	HC	Coenzyme transport and metabolism ; Energy production and conversion ;
unigene_c1435	KOG4523	Uncharacterized conserved protein	S	Function unknown ;
unigene_c1437	KOG0619	FOG: Leucine rich repeat	R	General function prediction only ;
unigene_c1438	KOG0583	Serine/threonine protein kinase	T	Signal transduction mechanisms ;
unigene_c1439	KOG2567	Uncharacterized conserved protein	S	Function unknown ;
unigene_c1441	KOG0702	Predicted GTPase-activating protein	T	Signal transduction mechanisms ;
unigene_c1442	KOG0653	Cyclin B and related kinase-activating proteins	D	Cell cycle control, cell division, chromosome partitioning ;
unigene_c1443	KOG2499	Beta-N-acetylhexosaminidase	G	Carbohydrate transport and metabolism ;
unigene_c1446	KOG4599	Putative mitochondrial/chloroplast ribosomal protein L45	J	Translation, ribosomal structure and biogenesis ;
unigene_c1447	KOG1081	Transcription factor NSD1 and related SET domain proteins	K	Transcription ;
unigene_c1448	KOG1378	Purple acid phosphatase	G	Carbohydrate transport and metabolism ;
unigene_c1449	KOG0055	Multidrug/pheromone exporter, ABC superfamily	Q	Secondary metabolites biosynthesis, transport and catabolism ;
unigene_c1450	KOG1061	Vesicle coat complex AP-1/AP-2/AP-4, beta subunit	U	Intracellular trafficking, secretion, and vesicular transport ;
unigene_c1451	KOG0272	U4/U6 small nuclear ribonucleoprotein Prp4 (contains WD40 repeats)	A	RNA processing and modification ;
unigene_c1452	KOG1030	Predicted Ca2+-dependent phospholipid-binding protein	R	General function prediction only ;
unigene_c1456	KOG0204	Calcium transporting ATPase	P	Inorganic ion transport and metabolism ;
unigene_c1457	KOG0318	WD40 repeat stress protein/actin interacting protein	Z	Cytoskeleton ;
unigene_c1458	KOG1515	Arylacetamide deacetylase	V	Defense mechanisms ;
unigene_c1459	KOG2280	Vacuolar assembly/sorting protein VPS16	U	Intracellular trafficking, secretion, and vesicular transport ;
unigene_c1461	KOG0698	Serine/threonine protein phosphatase	T	Signal transduction mechanisms ;
unigene_c1463	KOG2918	Carboxymethyl transferase	O	Posttranslational modification, protein turnover, chaperones ;
unigene_c1464	KOG4205	RNA-binding protein musashi/mRNA cleavage and polyadenylation factor I complex, subunit HRP1	A	RNA processing and modification ;
unigene_c1465	KOG0907	Thioredoxin	O	Posttranslational modification, protein turnover, chaperones ;
unigene_c1466	KOG1843	Uncharacterized conserved protein	S	Function unknown ;
unigene_c1467	KOG0118	FOG: RRM domain	R	General function prediction only ;
unigene_c1468	KOG0804	Cytoplasmic Zn-finger protein BRAP2 (BRCA1 associated protein)	R	General function prediction only ;
unigene_c1469	KOG2602	Predicted cell surface protein homologous to bacterial outer membrane proteins	R	General function prediction only ;
unigene_c1471	KOG1533	Predicted GTPase	R	General function prediction only ;
unigene_c1473	KOG0192	Tyrosine kinase specific for activated (GTP-bound) p21cdc42Hs	T	Signal transduction mechanisms ;
unigene_c1475	KOG2502	Tub family proteins	R	General function prediction only ;
unigene_c1476	KOG0259	Tyrosine aminotransferase	E	Amino acid transport and metabolism ;
unigene_c1477	KOG1987	Speckle-type POZ protein SPOP and related proteins with TRAF, MATH and BTB/POZ domains	DR	Cell cycle control, cell division, chromosome partitioning ; General function prediction only ;
unigene_c1480	KOG3035	Isoamyl acetate-hydrolyzing esterase	I	Lipid transport and metabolism ;
unigene_c1483	KOG0156	Cytochrome P450 CYP2 subfamily	Q	Secondary metabolites biosynthesis, transport and catabolism ;
unigene_c1484	KOG0490	Transcription factor, contains HOX domain	R	General function prediction only ;
unigene_c1487	KOG1957	DNA topoisomerase III beta	L	Replication, recombination and repair ;
unigene_c1488	KOG1347	Uncharacterized membrane protein, predicted efflux pump	R	General function prediction only ;
unigene_c1489	KOG0610	Putative serine/threonine protein kinase	R	General function prediction only ;
unigene_c1490	KOG0134	NADH:flavin oxidoreductase/12-oxophytodienoate reductase	CR	Energy production and conversion ; General function prediction only ;
unigene_c1491	KOG1071	Mitochondrial translation elongation factor EF-Tsmt, catalyzes nucleotide exchange on EF-Tumt	J	Translation, ribosomal structure and biogenesis ;
unigene_c1492	KOG2140	Uncharacterized conserved protein	R	General function prediction only ;
unigene_c1493	KOG2700	Adenylosuccinate lyase	F	Nucleotide transport and metabolism ;
unigene_c1495	KOG4271	Rho-GTPase activating protein	T	Signal transduction mechanisms ;
unigene_c1498	KOG1334	WD40 repeat protein	R	General function prediction only ;
unigene_c1501	KOG1444	Nucleotide-sugar transporter VRG4/SQV-7	GOU	Carbohydrate transport and metabolism ; Posttranslational modification, protein turnover, chaperones ; Intracellular trafficking, secretion, and vesicular transport ;
unigene_c1502	KOG1231	Proteins containing the FAD binding domain	C	Energy production and conversion ;
unigene_c1503	KOG0297	TNF receptor-associated factor	T	Signal transduction mechanisms ;
unigene_c1504	KOG0198	MEKK and related serine/threonine protein kinases	T	Signal transduction mechanisms ;
unigene_c1505	KOG0112	Large RNA-binding protein (RRM superfamily)	R	General function prediction only ;
unigene_c1506	KOG0032	Ca2+/calmodulin-dependent protein kinase, EF-Hand protein superfamily	T	Signal transduction mechanisms ;
unigene_c1508	KOG0157	Cytochrome P450 CYP4/CYP19/CYP26 subfamilies	QI	Secondary metabolites biosynthesis, transport and catabolism ; Lipid transport and metabolism ;
unigene_c1509	KOG4209	Splicing factor RNPS1, SR protein superfamily	A	RNA processing and modification ;
unigene_c1510	KOG4765	Uncharacterized conserved protein	S	Function unknown ;
unigene_c1511	KOG0572	Glutamine phosphoribosylpyrophosphate amidotransferase	F	Nucleotide transport and metabolism ;
unigene_c1512	KOG0361	Chaperonin complex component, TCP-1 eta subunit (CCT7)	O	Posttranslational modification, protein turnover, chaperones ;
unigene_c1514	KOG1364	Predicted ubiquitin regulatory protein, contains UAS and UBX domains	O	Posttranslational modification, protein turnover, chaperones ;
unigene_c1515	KOG4569	Predicted lipase	I	Lipid transport and metabolism ;
unigene_c1516	KOG1430	C-3 sterol dehydrogenase/3-beta-hydroxysteroid dehydrogenase and related dehydrogenases	IE	Lipid transport and metabolism ; Amino acid transport and metabolism ;
unigene_c1517	KOG1933	Cholesterol transport protein (Niemann-Pick C disease protein)	I	Lipid transport and metabolism ;
unigene_c1518	KOG0156	Cytochrome P450 CYP2 subfamily	Q	Secondary metabolites biosynthesis, transport and catabolism ;
unigene_c1519	KOG0619	FOG: Leucine rich repeat	R	General function prediction only ;
unigene_c1521	KOG1947	Leucine rich repeat proteins, some proteins contain F-box	R	General function prediction only ;
unigene_c1522	KOG1187	Serine/threonine protein kinase	T	Signal transduction mechanisms ;
unigene_c1523	KOG4293	Predicted membrane protein, contains DoH and Cytochrome b-561/ferric reductase transmembrane domains	T	Signal transduction mechanisms ;
unigene_c1524	KOG1252	Cystathionine beta-synthase and related enzymes	E	Amino acid transport and metabolism ;
unigene_c1526	KOG4287	Pectin acetylesterase and similar proteins	M	Cell wall/membrane/envelope biogenesis ;
unigene_c1527	KOG0285	Pleiotropic regulator 1	A	RNA processing and modification ;
unigene_c1528	KOG0457	Histone acetyltransferase complex SAGA/ADA, subunit ADA2	B	Chromatin structure and dynamics ;
unigene_c1529	KOG0267	Microtubule severing protein katanin p80 subunit B (contains WD40 repeats)	D	Cell cycle control, cell division, chromosome partitioning ;
unigene_c1533	KOG1221	Acyl-CoA reductase	I	Lipid transport and metabolism ;
unigene_c1534	KOG4569	Predicted lipase	I	Lipid transport and metabolism ;
unigene_c1535	KOG1454	Predicted hydrolase/acyltransferase (alpha/beta hydrolase superfamily)	R	General function prediction only ;
unigene_c1536	KOG3126	Porin/voltage-dependent anion-selective channel protein	P	Inorganic ion transport and metabolism ;
unigene_c1537	KOG0293	WD40 repeat-containing protein	S	Function unknown ;
unigene_c1538	KOG2246	Galactosyltransferases	G	Carbohydrate transport and metabolism ;
unigene_c1540	KOG4237	Extracellular matrix protein slit, contains leucine-rich and EGF-like repeats	WT	Extracellular structures ; Signal transduction mechanisms ;
unigene_c1543	KOG0761	Mitochondrial carrier protein CGI-69	C	Energy production and conversion ;
unigene_c1544	KOG0916	1,3-beta-glucan synthase/callose synthase catalytic subunit	M	Cell wall/membrane/envelope biogenesis ;
unigene_c1546	KOG1474	Transcription initiation factor TFIID, subunit BDF1 and related bromodomain proteins	K	Transcription ;
unigene_c1547	KOG1985	Vesicle coat complex COPII, subunit SEC24/subunit SFB2	U	Intracellular trafficking, secretion, and vesicular transport ;
unigene_c1548	KOG1082	Histone H3 (Lys9) methyltransferase SUV39H1/Clr4, required for transcriptional silencing	BK	Chromatin structure and dynamics ; Transcription ;
unigene_c1549	KOG0331	ATP-dependent RNA helicase	A	RNA processing and modification ;
unigene_c1550	KOG1067	Predicted RNA-binding polyribonucleotide nucleotidyltransferase	R	General function prediction only ;
unigene_c1551	KOG1154	Gamma-glutamyl kinase	E	Amino acid transport and metabolism ;
unigene_c1552	KOG4677	Golgi integral membrane protein	UR	Intracellular trafficking, secretion, and vesicular transport ; General function prediction only ;
unigene_c1554	KOG0222	Phenylalanine and histidine ammonia-lyase	Q	Secondary metabolites biosynthesis, transport and catabolism ;
unigene_c1555	KOG1865	Ubiquitin carboxyl-terminal hydrolase	O	Posttranslational modification, protein turnover, chaperones ;
unigene_c1556	KOG1303	Amino acid transporters	E	Amino acid transport and metabolism ;
unigene_c1557	KOG2521	Uncharacterized conserved protein	S	Function unknown ;
unigene_c1558	KOG0161	Myosin class II heavy chain	Z	Cytoskeleton ;
unigene_c1559	KOG1865	Ubiquitin carboxyl-terminal hydrolase	O	Posttranslational modification, protein turnover, chaperones ;
unigene_c1560	KOG1397	Ca2+/H+ antiporter VCX1 and related proteins	P	Inorganic ion transport and metabolism ;
unigene_c1561	KOG2056	Equilibrative nucleoside transporter protein	F	Nucleotide transport and metabolism ;
unigene_c1562	KOG0632	Phytochelatin synthase	P	Inorganic ion transport and metabolism ;
unigene_c1563	KOG0171	Mitochondrial inner membrane protease, subunit IMP1	O	Posttranslational modification, protein turnover, chaperones ;
unigene_c1564	KOG0128	RNA-binding protein SART3 (RRM superfamily)	A	RNA processing and modification ;
unigene_c1566	KOG4203	Armadillo/beta-Catenin/plakoglobin	TZ	Signal transduction mechanisms ; Cytoskeleton ;
unigene_c1568	KOG1901	Uncharacterized high-glucose-regulated protein	R	General function prediction only ;
unigene_c1569	KOG0523	Transketolase	G	Carbohydrate transport and metabolism ;
unigene_c1570	KOG2440	Pyrophosphate-dependent phosphofructo-1-kinase	G	Carbohydrate transport and metabolism ;
unigene_c1571	KOG1601	GATA-4/5/6 transcription factors	K	Transcription ;
unigene_c1572	KOG0583	Serine/threonine protein kinase	T	Signal transduction mechanisms ;
unigene_c1573	KOG2779	N-myristoyl transferase	I	Lipid transport and metabolism ;
unigene_c1576	KOG2203	GTP-binding protein	R	General function prediction only ;
unigene_c1578	KOG1476	Beta-1,3-glucuronyltransferase B3GAT1/SQV-8	O	Posttranslational modification, protein turnover, chaperones ;
unigene_c1579	KOG1164	Casein kinase (serine/threonine/tyrosine protein kinase)	T	Signal transduction mechanisms ;
unigene_c1582	KOG2449	Methylmalonate semialdehyde dehydrogenase	EG	Amino acid transport and metabolism ; Carbohydrate transport and metabolism ;
unigene_c1584	KOG3015	F1-ATP synthase assembly protein	C	Energy production and conversion ;
unigene_c1586	KOG1258	mRNA processing protein	A	RNA processing and modification ;
unigene_c1588	KOG1588	RNA-binding protein Sam68 and related KH domain proteins	A	RNA processing and modification ;
unigene_c1589	KOG0376	Serine-threonine phosphatase 2A, catalytic subunit	R	General function prediction only ;
unigene_c1590	KOG1448	Ribose-phosphate pyrophosphokinase	FE	Nucleotide transport and metabolism ; Amino acid transport and metabolism ;
unigene_c1591	KOG0496	Beta-galactosidase	G	Carbohydrate transport and metabolism ;
unigene_c1592	KOG0399	Glutamate synthase	E	Amino acid transport and metabolism ;
unigene_c1594	KOG0331	ATP-dependent RNA helicase	A	RNA processing and modification ;
unigene_c1595	KOG1263	Multicopper oxidases	Q	Secondary metabolites biosynthesis, transport and catabolism ;
unigene_c1596	KOG0812	SNARE protein SED5/Syntaxin 5	U	Intracellular trafficking, secretion, and vesicular transport ;
unigene_c1597	KOG1947	Leucine rich repeat proteins, some proteins contain F-box	R	General function prediction only ;
unigene_c1598	KOG1609	Protein involved in mRNA turnover and stability	A	RNA processing and modification ;
unigene_c1599	KOG0237	Glycinamide ribonucleotide synthetase (GARS)/Aminoimidazole ribonucleotide synthetase (AIRS)	F	Nucleotide transport and metabolism ;
unigene_c1600	KOG1192	UDP-glucuronosyl and UDP-glucosyl transferase	GC	Carbohydrate transport and metabolism ; Energy production and conversion ;
unigene_c1603	KOG1329	Phospholipase D1	I	Lipid transport and metabolism ;
unigene_c1604	KOG1394	3-oxoacyl-(acyl-carrier-protein) synthase (I and II)	IQ	Lipid transport and metabolism ; Secondary metabolites biosynthesis, transport and catabolism ;
unigene_c1605	KOG1474	Transcription initiation factor TFIID, subunit BDF1 and related bromodomain proteins	K	Transcription ;
unigene_c1606	KOG0582	Ste20-like serine/threonine protein kinase	T	Signal transduction mechanisms ;
unigene_c1607	KOG1614	Exosomal 3'-5' exoribonuclease complex, subunit Rrp45	J	Translation, ribosomal structure and biogenesis ;
unigene_c1608	KOG1256	Long-chain acyl-CoA synthetases (AMP-forming)	I	Lipid transport and metabolism ;
unigene_c1609	KOG1187	Serine/threonine protein kinase	T	Signal transduction mechanisms ;
unigene_c1610	KOG0136	Acyl-CoA oxidase	I	Lipid transport and metabolism ;
unigene_c1611	KOG0661	MAPK related serine/threonine protein kinase	T	Signal transduction mechanisms ;
unigene_c1612	KOG0635	Adenosine 5'-phosphosulfate kinase	P	Inorganic ion transport and metabolism ;
unigene_c1613	KOG1440	CDP-diacylglycerol synthase	I	Lipid transport and metabolism ;
unigene_c1614	KOG1237	H+/oligopeptide symporter	E	Amino acid transport and metabolism ;
unigene_c1615	KOG0619	FOG: Leucine rich repeat	R	General function prediction only ;
unigene_c1616	KOG1321	Protoheme ferro-lyase (ferrochelatase)	H	Coenzyme transport and metabolism ;
unigene_c1617	KOG4585	Predicted transposase	L	Replication, recombination and repair ;
unigene_c1618	KOG1192	UDP-glucuronosyl and UDP-glucosyl transferase	GC	Carbohydrate transport and metabolism ; Energy production and conversion ;
unigene_c1619	KOG0698	Serine/threonine protein phosphatase	T	Signal transduction mechanisms ;
unigene_c1620	KOG0239	Kinesin (KAR3 subfamily)	Z	Cytoskeleton ;
unigene_c1621	KOG3298	DNA-directed RNA polymerase subunit E'	K	Transcription ;
unigene_c1622	KOG2174	Leptin receptor gene-related protein	T	Signal transduction mechanisms ;
unigene_c1623	KOG1479	Nucleoside transporter	F	Nucleotide transport and metabolism ;
unigene_c1624	KOG2790	Phosphoserine aminotransferase	HE	Coenzyme transport and metabolism ; Amino acid transport and metabolism ;
unigene_c1625	KOG1081	Transcription factor NSD1 and related SET domain proteins	K	Transcription ;
unigene_c1626	KOG2155	Tubulin-tyrosine ligase-related protein	O	Posttranslational modification, protein turnover, chaperones ;
unigene_c1627	KOG4197	FOG: PPR repeat	R	General function prediction only ;
unigene_c1629	KOG1187	Serine/threonine protein kinase	T	Signal transduction mechanisms ;
unigene_c1631	KOG1778	CREB binding protein/P300 and related TAZ Zn-finger proteins	K	Transcription ;
unigene_c1633	KOG2850	Predicted peptidoglycan-binding protein, contains LysM domain	R	General function prediction only ;
unigene_c1635	KOG0619	FOG: Leucine rich repeat	R	General function prediction only ;
unigene_c1638	KOG1947	Leucine rich repeat proteins, some proteins contain F-box	R	General function prediction only ;
unigene_c1639	KOG2992	Nucleolar GTPase/ATPase p130	Y	Nuclear structure ;
unigene_c1642	KOG1175	Acyl-CoA synthetase	I	Lipid transport and metabolism ;
unigene_c1643	KOG0806	Carbon-nitrogen hydrolase	E	Amino acid transport and metabolism ;
unigene_c1646	KOG2197	Ypt/Rab-specific GTPase-activating protein GYP7 and related proteins	T	Signal transduction mechanisms ;
unigene_c1648	KOG0032	Ca2+/calmodulin-dependent protein kinase, EF-Hand protein superfamily	T	Signal transduction mechanisms ;
unigene_c1649	KOG2416	Acinus (induces apoptotic chromatin condensation)	B	Chromatin structure and dynamics ;
unigene_c1650	KOG1922	Rho GTPase effector BNI1 and related formins	TZ	Signal transduction mechanisms ; Cytoskeleton ;
unigene_c1651	KOG0161	Myosin class II heavy chain	Z	Cytoskeleton ;
unigene_c1654	KOG1877	Putative transmembrane protein cmp44E	R	General function prediction only ;
unigene_c1657	KOG1973	Chromatin remodeling protein, contains PHD Zn-finger	B	Chromatin structure and dynamics ;
unigene_c1659	KOG1845	MORC family ATPases	D	Cell cycle control, cell division, chromosome partitioning ;
unigene_c1661	KOG0192	Tyrosine kinase specific for activated (GTP-bound) p21cdc42Hs	T	Signal transduction mechanisms ;
unigene_c1662	KOG4165	Gamma-glutamyl phosphate reductase	E	Amino acid transport and metabolism ;
unigene_c1663	KOG0698	Serine/threonine protein phosphatase	T	Signal transduction mechanisms ;
unigene_c1664	KOG2587	RNA polymerase III (C) subunit	K	Transcription ;
unigene_c1665	KOG2505	Ankyrin repeat protein	R	General function prediction only ;
unigene_c1666	KOG1411	Aspartate aminotransferase/Glutamic oxaloacetic transaminase AAT1/GOT2	E	Amino acid transport and metabolism ;
unigene_c1667	KOG1867	Ubiquitin-specific protease	O	Posttranslational modification, protein turnover, chaperones ;
unigene_c1668	KOG2916	Translation initiation factor 2, alpha subunit (eIF-2alpha)	J	Translation, ribosomal structure and biogenesis ;
unigene_c1669	KOG1257	NADP+-dependent malic enzyme	C	Energy production and conversion ;
unigene_c1670	KOG0024	Sorbitol dehydrogenase	Q	Secondary metabolites biosynthesis, transport and catabolism ;
unigene_c1671	KOG0916	1,3-beta-glucan synthase/callose synthase catalytic subunit	M	Cell wall/membrane/envelope biogenesis ;
unigene_c1673	KOG2381	Phosphatidylinositol 4-kinase	T	Signal transduction mechanisms ;
unigene_c1674	KOG1153	Subtilisin-related protease/Vacuolar protease B	O	Posttranslational modification, protein turnover, chaperones ;
unigene_c1675	KOG1066	Glucosidase II catalytic (alpha) subunit and related enzymes, glycosyl hydrolase family 31	GMO	Carbohydrate transport and metabolism ; Cell wall/membrane/envelope biogenesis ; Posttranslational modification, protein turnover, chaperones ;
unigene_c1676	KOG0853	Glycosyltransferase	M	Cell wall/membrane/envelope biogenesis ;
unigene_c1677	KOG4536	Predicted membrane protein	S	Function unknown ;
unigene_c1679	KOG0997	Uncharacterized conserved protein Sand	S	Function unknown ;
unigene_c1682	KOG0385	Chromatin remodeling complex WSTF-ISWI, small subunit	K	Transcription ;
unigene_c1683	KOG1153	Subtilisin-related protease/Vacuolar protease B	O	Posttranslational modification, protein turnover, chaperones ;
unigene_c1684	KOG0800	FOG: Predicted E3 ubiquitin ligase	O	Posttranslational modification, protein turnover, chaperones ;
unigene_c1685	KOG1169	Diacylglycerol kinase	IT	Lipid transport and metabolism ; Signal transduction mechanisms ;
unigene_c1686	KOG0660	Mitogen-activated protein kinase	T	Signal transduction mechanisms ;
unigene_c1687	KOG0620	Glucose-repressible alcohol dehydrogenase transcriptional effector CCR4 and related proteins	K	Transcription ;
unigene_c1688	KOG0039	Ferric reductase, NADH/NADPH oxidase and related proteins	PQ	Inorganic ion transport and metabolism ; Secondary metabolites biosynthesis, transport and catabolism ;
unigene_c1689	KOG0022	Alcohol dehydrogenase, class III	Q	Secondary metabolites biosynthesis, transport and catabolism ;
unigene_c1690	KOG2547	Ceramide glucosyltransferase	IM	Lipid transport and metabolism ; Cell wall/membrane/envelope biogenesis ;
unigene_c1692	KOG0103	Molecular chaperones HSP105/HSP110/SSE1, HSP70 superfamily	O	Posttranslational modification, protein turnover, chaperones ;
unigene_c1695	KOG0118	FOG: RRM domain	R	General function prediction only ;
unigene_c1698	KOG1595	CCCH-type Zn-finger protein	R	General function prediction only ;
unigene_c1700	KOG3599	Ca2+-modulated nonselective cation channel polycystin	PT	Inorganic ion transport and metabolism ; Signal transduction mechanisms ;
unigene_c1702	KOG1383	Glutamate decarboxylase/sphingosine phosphate lyase	E	Amino acid transport and metabolism ;
unigene_c1703	KOG0383	Predicted helicase	R	General function prediction only ;
unigene_c1704	KOG0443	Actin regulatory proteins (gelsolin/villin family)	Z	Cytoskeleton ;
unigene_c1705	KOG2521	Uncharacterized conserved protein	S	Function unknown ;
unigene_c1709	KOG2484	GTPase	R	General function prediction only ;
unigene_c1710	KOG4547	WD40 repeat-containing protein	R	General function prediction only ;
unigene_c1711	KOG0167	FOG: Armadillo/beta-catenin-like repeats	S	Function unknown ;
unigene_c1712	KOG4757	Predicted telomere binding protein	R	General function prediction only ;
unigene_c1713	KOG1959	Glycosyl hydrolase, family 38 - alpha-mannosidase	G	Carbohydrate transport and metabolism ;
unigene_c1715	KOG0332	ATP-dependent RNA helicase	A	RNA processing and modification ;
unigene_c1718	KOG2116	Protein involved in plasmid maintenance/nuclear protein involved in lipid metabolism	NI	Cell motility ; Lipid transport and metabolism ;
unigene_c1719	KOG2217	U4/U6.U5 snRNP associated protein	A	RNA processing and modification ;
unigene_c1720	KOG1485	Mitochondrial Fe2+ transporter MMT1 and related transporters (cation diffusion facilitator superfamily)	P	Inorganic ion transport and metabolism ;
unigene_c1721	KOG0834	CDK9 kinase-activating protein cyclin T	D	Cell cycle control, cell division, chromosome partitioning ;
unigene_c1722	KOG1051	Chaperone HSP104 and related ATP-dependent Clp proteases	O	Posttranslational modification, protein turnover, chaperones ;
unigene_c1723	KOG2019	Metalloendoprotease HMP1 (insulinase superfamily)	RO	General function prediction only ; Posttranslational modification, protein turnover, chaperones ;
unigene_c1724	KOG0902	Phosphatidylinositol 4-kinase	T	Signal transduction mechanisms ;
unigene_c1725	KOG0167	FOG: Armadillo/beta-catenin-like repeats	S	Function unknown ;
unigene_c1726	KOG0678	Actin-related protein Arp2/3 complex, subunit Arp3	Z	Cytoskeleton ;
unigene_c1728	KOG1062	Vesicle coat complex AP-1, gamma subunit	U	Intracellular trafficking, secretion, and vesicular transport ;
unigene_c1729	KOG2119	Predicted bile acid beta-glucosidase	G	Carbohydrate transport and metabolism ;
unigene_c1730	KOG1187	Serine/threonine protein kinase	T	Signal transduction mechanisms ;
unigene_c1731	KOG0496	Beta-galactosidase	G	Carbohydrate transport and metabolism ;
unigene_c1733	KOG3177	Oligoketide cyclase/lipid transport protein	I	Lipid transport and metabolism ;
unigene_c1734	KOG0198	MEKK and related serine/threonine protein kinases	T	Signal transduction mechanisms ;
unigene_c1735	KOG2667	COPII vesicle protein	U	Intracellular trafficking, secretion, and vesicular transport ;
unigene_c1736	KOG1466	Translation initiation factor 2B, alpha subunit (eIF-2Balpha/GCN3)	J	Translation, ribosomal structure and biogenesis ;
unigene_c1738	KOG2262	Sexual differentiation process protein ISP4	T	Signal transduction mechanisms ;
unigene_c1739	KOG2184	Tuftelin-interacting protein TIP39, contains G-patch domain	A	RNA processing and modification ;
unigene_c1741	KOG4343	bZIP transcription factor ATF6	K	Transcription ;
unigene_c1745	KOG3078	Adenylate kinase	F	Nucleotide transport and metabolism ;
unigene_c1747	KOG4658	Apoptotic ATPase	T	Signal transduction mechanisms ;
unigene_c1748	KOG0583	Serine/threonine protein kinase	T	Signal transduction mechanisms ;
unigene_c1749	KOG0054	Multidrug resistance-associated protein/mitoxantrone resistance protein, ABC superfamily	Q	Secondary metabolites biosynthesis, transport and catabolism ;
unigene_c1750	KOG0504	FOG: Ankyrin repeat	R	General function prediction only ;
unigene_c1751	KOG1240	Protein kinase containing WD40 repeats	T	Signal transduction mechanisms ;
unigene_c1752	KOG2927	Membrane component of ER protein translocation complex	U	Intracellular trafficking, secretion, and vesicular transport ;
unigene_c1753	KOG3229	Vacuolar sorting protein VPS24	U	Intracellular trafficking, secretion, and vesicular transport ;
unigene_c1754	KOG1125	TPR repeat-containing protein	R	General function prediction only ;
unigene_c1755	KOG0384	Chromodomain-helicase DNA-binding protein	K	Transcription ;
unigene_c1756	KOG2286	Exocyst complex subunit SEC6	U	Intracellular trafficking, secretion, and vesicular transport ;
unigene_c1757	KOG1012	Ca2+-dependent lipid-binding protein CLB1/vesicle protein vp115/Granuphilin A, contains C2 domain	R	General function prediction only ;
unigene_c1759	KOG1245	Chromatin remodeling complex WSTF-ISWI, large subunit (contains heterochromatin localization, PHD and BROMO domains)	B	Chromatin structure and dynamics ;
unigene_c1760	KOG1525	Sister chromatid cohesion complex Cohesin, subunit PDS5	D	Cell cycle control, cell division, chromosome partitioning ;
unigene_c1761	KOG4821	Predicted Na+-dependent cotransporter	R	General function prediction only ;
unigene_c1764	KOG0715	Molecular chaperone (DnaJ superfamily)	O	Posttranslational modification, protein turnover, chaperones ;
unigene_c1765	KOG0657	Glyceraldehyde 3-phosphate dehydrogenase	G	Carbohydrate transport and metabolism ;
unigene_c1767	KOG1205	Predicted dehydrogenase	Q	Secondary metabolites biosynthesis, transport and catabolism ;
unigene_c1769	KOG2497	Predicted methyltransferase	R	General function prediction only ;
unigene_c1770	KOG1689	mRNA cleavage factor I subunit	A	RNA processing and modification ;
unigene_c1771	KOG2465	Uncharacterized conserved protein	S	Function unknown ;
unigene_c1772	KOG2171	Karyopherin (importin) beta 3	YU	Nuclear structure ; Intracellular trafficking, secretion, and vesicular transport ;
unigene_c1774	KOG1543	Cysteine proteinase Cathepsin L	O	Posttranslational modification, protein turnover, chaperones ;
unigene_c1775	KOG0022	Alcohol dehydrogenase, class III	Q	Secondary metabolites biosynthesis, transport and catabolism ;
unigene_c1778	KOG4148	Uncharacterized conserved protein	S	Function unknown ;
unigene_c1779	KOG3140	Predicted membrane protein	S	Function unknown ;
unigene_c1780	KOG1134	Uncharacterized conserved protein	R	General function prediction only ;
unigene_c1781	KOG1612	Exosomal 3'-5' exoribonuclease complex, subunit Rrp42	J	Translation, ribosomal structure and biogenesis ;
unigene_c1782	KOG1192	UDP-glucuronosyl and UDP-glucosyl transferase	GC	Carbohydrate transport and metabolism ; Energy production and conversion ;
unigene_c1783	KOG1919	RNA pseudouridylate synthases	A	RNA processing and modification ;
unigene_c1784	KOG3084	NADH pyrophosphatase I of the Nudix family of hydrolases	L	Replication, recombination and repair ;
unigene_c1785	KOG0724	Zuotin and related molecular chaperones (DnaJ superfamily), contains DNA-binding domains	O	Posttranslational modification, protein turnover, chaperones ;
unigene_c1787	KOG1840	Kinesin light chain	Z	Cytoskeleton ;
unigene_c1789	KOG0851	Single-stranded DNA-binding replication protein A (RPA), large (70 kD) subunit and related ssDNA-binding proteins	L	Replication, recombination and repair ;
unigene_c1790	KOG1948	Metalloproteinase-related collagenase pM5	O	Posttranslational modification, protein turnover, chaperones ;
unigene_c1792	KOG0916	1,3-beta-glucan synthase/callose synthase catalytic subunit	M	Cell wall/membrane/envelope biogenesis ;
unigene_c1793	KOG0046	Ca2+-binding actin-bundling protein (fimbrin/plastin), EF-Hand protein superfamily	Z	Cytoskeleton ;
unigene_c1794	KOG1091	Ypt/Rab-specific GTPase-activating protein GYP6	U	Intracellular trafficking, secretion, and vesicular transport ;
unigene_c1796	KOG2964	Arginase family protein	E	Amino acid transport and metabolism ;
unigene_c1797	KOG2401	Predicted MutS-related protein involved in mismatch repair	L	Replication, recombination and repair ;
unigene_c1799	KOG0157	Cytochrome P450 CYP4/CYP19/CYP26 subfamilies	QI	Secondary metabolites biosynthesis, transport and catabolism ; Lipid transport and metabolism ;
unigene_c1800	KOG0715	Molecular chaperone (DnaJ superfamily)	O	Posttranslational modification, protein turnover, chaperones ;
unigene_c1803	KOG0230	Phosphatidylinositol-4-phosphate 5-kinase and related FYVE finger-containing proteins	T	Signal transduction mechanisms ;
unigene_c1804	KOG2119	Predicted bile acid beta-glucosidase	G	Carbohydrate transport and metabolism ;
unigene_c1808	KOG2930	SCF ubiquitin ligase, Rbx1 component	O	Posttranslational modification, protein turnover, chaperones ;
unigene_c1809	KOG2330	Splicing factor 3b, subunit 2	A	RNA processing and modification ;
unigene_c1810	KOG1282	Serine carboxypeptidases (lysosomal cathepsin A)	OE	Posttranslational modification, protein turnover, chaperones ; Amino acid transport and metabolism ;
unigene_c1811	KOG2507	Ubiquitin regulatory protein UBXD2, contains UAS and UBX domains	R	General function prediction only ;
unigene_c1815	KOG2117	Uncharacterized conserved protein	S	Function unknown ;
unigene_c1816	KOG0884	Similar to cyclophilin-type peptidyl-prolyl cis-trans isomerase	O	Posttranslational modification, protein turnover, chaperones ;
unigene_c1817	KOG0446	Vacuolar sorting protein VPS1, dynamin, and related proteins	UR	Intracellular trafficking, secretion, and vesicular transport ; General function prediction only ;
unigene_c1818	KOG1917	Membrane-associated hematopoietic protein	R	General function prediction only ;
unigene_c1819	KOG1679	Enoyl-CoA hydratase	I	Lipid transport and metabolism ;
unigene_c1821	KOG1850	Myosin-like coiled-coil protein	Z	Cytoskeleton ;
unigene_c1822	KOG0470	1,4-alpha-glucan branching enzyme/starch branching enzyme II	G	Carbohydrate transport and metabolism ;
unigene_c1823	KOG4203	Armadillo/beta-Catenin/plakoglobin	TZ	Signal transduction mechanisms ; Cytoskeleton ;
unigene_c1824	KOG0462	Elongation factor-type GTP-binding protein	J	Translation, ribosomal structure and biogenesis ;
unigene_c1825	KOG1652	Mitochondrial import inner membrane translocase, subunit TIM17	U	Intracellular trafficking, secretion, and vesicular transport ;
unigene_c1826	KOG3933	Mitochondrial ribosomal protein S28	J	Translation, ribosomal structure and biogenesis ;
unigene_c1827	KOG2204	Mannosyl-oligosaccharide alpha-1,2-mannosidase and related glycosyl hydrolases	G	Carbohydrate transport and metabolism ;
unigene_c1828	KOG0439	VAMP-associated protein involved in inositol metabolism	U	Intracellular trafficking, secretion, and vesicular transport ;
unigene_c1829	KOG2946	Uncharacterized conserved protein	S	Function unknown ;
unigene_c1830	KOG4197	FOG: PPR repeat	R	General function prediction only ;
unigene_c1831	KOG2190	PolyC-binding proteins alphaCP-1 and related KH domain proteins	AR	RNA processing and modification ; General function prediction only ;
unigene_c1832	KOG2352	Predicted spermine/spermidine synthase	E	Amino acid transport and metabolism ;
unigene_c1833	KOG0156	Cytochrome P450 CYP2 subfamily	Q	Secondary metabolites biosynthesis, transport and catabolism ;
unigene_c1834	KOG4201	Anthranilate synthase component II	E	Amino acid transport and metabolism ;
unigene_c1836	KOG1007	WD repeat protein TSSC1, WD repeat superfamily	S	Function unknown ;
unigene_c1838	KOG1947	Leucine rich repeat proteins, some proteins contain F-box	R	General function prediction only ;
unigene_c1839	KOG2730	Methylase	R	General function prediction only ;
unigene_c1841	KOG0737	AAA+-type ATPase	O	Posttranslational modification, protein turnover, chaperones ;
unigene_c1842	KOG0698	Serine/threonine protein phosphatase	T	Signal transduction mechanisms ;
unigene_c1844	KOG0684	Cytochrome P450	Q	Secondary metabolites biosynthesis, transport and catabolism ;
unigene_c1845	KOG0731	AAA+-type ATPase containing the peptidase M41 domain	O	Posttranslational modification, protein turnover, chaperones ;
unigene_c1848	KOG2982	Uncharacterized conserved protein	S	Function unknown ;
unigene_c1849	KOG4658	Apoptotic ATPase	T	Signal transduction mechanisms ;
unigene_c1850	KOG0280	Uncharacterized conserved protein	E	Amino acid transport and metabolism ;
unigene_c1851	KOG0355	DNA topoisomerase type II	B	Chromatin structure and dynamics ;
unigene_c1852	KOG0198	MEKK and related serine/threonine protein kinases	T	Signal transduction mechanisms ;
unigene_c1853	KOG0631	Galactokinase	G	Carbohydrate transport and metabolism ;
unigene_c1854	KOG1176	Acyl-CoA synthetase	I	Lipid transport and metabolism ;
unigene_c1855	KOG0029	Amine oxidase	Q	Secondary metabolites biosynthesis, transport and catabolism ;
unigene_c1857	KOG1327	Copine	T	Signal transduction mechanisms ;
unigene_c1863	KOG4791	Uncharacterized conserved protein	S	Function unknown ;
unigene_c1864	KOG0622	Ornithine decarboxylase	E	Amino acid transport and metabolism ;
unigene_c1865	KOG1208	Dehydrogenases with different specificities (related to short-chain alcohol dehydrogenases)	Q	Secondary metabolites biosynthesis, transport and catabolism ;
unigene_c1866	KOG2931	Differentiation-related gene 1 protein (NDR1 protein), related proteins	S	Function unknown ;
unigene_c1867	KOG1187	Serine/threonine protein kinase	T	Signal transduction mechanisms ;
unigene_c1868	KOG1659	Class 2 transcription repressor NC2, alpha subunit (DRAP1)	K	Transcription ;
unigene_c1869	KOG1187	Serine/threonine protein kinase	T	Signal transduction mechanisms ;
unigene_c1873	KOG1435	Sterol reductase/lamin B receptor	IT	Lipid transport and metabolism ; Signal transduction mechanisms ;
unigene_c1874	KOG1164	Casein kinase (serine/threonine/tyrosine protein kinase)	T	Signal transduction mechanisms ;
unigene_c1875	KOG1581	UDP-galactose transporter related protein	G	Carbohydrate transport and metabolism ;
unigene_c1877	KOG4666	Predicted phosphate acyltransferase, contains PlsC domain	I	Lipid transport and metabolism ;
unigene_c1878	KOG2421	Predicted starch-binding protein	R	General function prediction only ;
unigene_c1879	KOG1100	Predicted E3 ubiquitin ligase	O	Posttranslational modification, protein turnover, chaperones ;
unigene_c1880	KOG0242	Kinesin-like protein	Z	Cytoskeleton ;
unigene_c1882	KOG0734	AAA+-type ATPase containing the peptidase M41 domain	O	Posttranslational modification, protein turnover, chaperones ;
unigene_c1884	KOG1455	Lysophospholipase	I	Lipid transport and metabolism ;
unigene_c1885	KOG2194	Aminopeptidases of the M20 family	OR	Posttranslational modification, protein turnover, chaperones ; General function prediction only ;
unigene_c1886	KOG0523	Transketolase	G	Carbohydrate transport and metabolism ;
unigene_c1887	KOG2048	WD40 repeat protein	R	General function prediction only ;
unigene_c1889	KOG2824	Glutaredoxin-related protein	O	Posttranslational modification, protein turnover, chaperones ;
unigene_c1890	KOG0504	FOG: Ankyrin repeat	R	General function prediction only ;
unigene_c1892	KOG2274	Predicted importin 9	UY	Intracellular trafficking, secretion, and vesicular transport ; Nuclear structure ;
unigene_c1893	KOG1208	Dehydrogenases with different specificities (related to short-chain alcohol dehydrogenases)	Q	Secondary metabolites biosynthesis, transport and catabolism ;
unigene_c1894	KOG1316	Argininosuccinate lyase	E	Amino acid transport and metabolism ;
unigene_c1896	KOG0554	Asparaginyl-tRNA synthetase (mitochondrial)	J	Translation, ribosomal structure and biogenesis ;
unigene_c1898	KOG4765	Uncharacterized conserved protein	S	Function unknown ;
unigene_c1900	KOG1037	NAD+ ADP-ribosyltransferase Parp, required for poly-ADP ribosylation of nuclear proteins	KLO	Transcription ; Replication, recombination and repair ; Posttranslational modification, protein turnover, chaperones ;
unigene_c1901	KOG2829	E2F-like protein	K	Transcription ;
unigene_c1903	KOG1911	Heterochromatin-associated protein HP1 and related CHROMO domain proteins	B	Chromatin structure and dynamics ;
unigene_c1907	KOG1188	WD40 repeat protein	R	General function prediction only ;
unigene_c1908	KOG1320	Serine protease	O	Posttranslational modification, protein turnover, chaperones ;
unigene_c1910	KOG0144	RNA-binding protein CUGBP1/BRUNO (RRM superfamily)	A	RNA processing and modification ;
unigene_c1911	KOG0206	P-type ATPase	R	General function prediction only ;
unigene_c1912	KOG0202	Ca2+ transporting ATPase	P	Inorganic ion transport and metabolism ;
unigene_c1913	KOG0252	Inorganic phosphate transporter	P	Inorganic ion transport and metabolism ;
unigene_c1914	KOG0116	RasGAP SH3 binding protein rasputin, contains NTF2 and RRM domains	T	Signal transduction mechanisms ;
unigene_c1915	KOG4791	Uncharacterized conserved protein	S	Function unknown ;
unigene_c1916	KOG0522	Ankyrin repeat protein	R	General function prediction only ;
unigene_c1917	KOG1091	Ypt/Rab-specific GTPase-activating protein GYP6	U	Intracellular trafficking, secretion, and vesicular transport ;
unigene_c1920	KOG0922	DEAH-box RNA helicase	A	RNA processing and modification ;
unigene_c1922	KOG1187	Serine/threonine protein kinase	T	Signal transduction mechanisms ;
unigene_c1923	KOG1235	Predicted unusual protein kinase	R	General function prediction only ;
unigene_c1924	KOG3075	Ribose 5-phosphate isomerase	G	Carbohydrate transport and metabolism ;
unigene_c1925	KOG1940	Zn-finger protein	R	General function prediction only ;
unigene_c1926	KOG1164	Casein kinase (serine/threonine/tyrosine protein kinase)	T	Signal transduction mechanisms ;
unigene_c1927	KOG2175	Protein predicted to be involved in carbohydrate metabolism	G	Carbohydrate transport and metabolism ;
unigene_c1928	KOG4204	Histone deacetylase complex, SIN3 component	B	Chromatin structure and dynamics ;
unigene_c1929	KOG1223	Isochorismate synthase	E	Amino acid transport and metabolism ;
unigene_c1930	KOG0157	Cytochrome P450 CYP4/CYP19/CYP26 subfamilies	QI	Secondary metabolites biosynthesis, transport and catabolism ; Lipid transport and metabolism ;
unigene_c1931	KOG1066	Glucosidase II catalytic (alpha) subunit and related enzymes, glycosyl hydrolase family 31	GMO	Carbohydrate transport and metabolism ; Cell wall/membrane/envelope biogenesis ; Posttranslational modification, protein turnover, chaperones ;
unigene_c1934	KOG0266	WD40 repeat-containing protein	R	General function prediction only ;
unigene_c1935	KOG3097	Predicted membrane protein	S	Function unknown ;
unigene_c1936	KOG3134	Predicted membrane protein	S	Function unknown ;
unigene_c1937	KOG0266	WD40 repeat-containing protein	R	General function prediction only ;
unigene_c1938	KOG1347	Uncharacterized membrane protein, predicted efflux pump	R	General function prediction only ;
unigene_c1939	KOG0853	Glycosyltransferase	M	Cell wall/membrane/envelope biogenesis ;
unigene_c1940	KOG0117	Heterogeneous nuclear ribonucleoprotein R (RRM superfamily)	A	RNA processing and modification ;
unigene_c1942	KOG2632	Rhomboid family proteins	S	Function unknown ;
unigene_c1943	KOG1257	NADP+-dependent malic enzyme	C	Energy production and conversion ;
unigene_c1944	KOG4519	Phosphomevalonate kinase	I	Lipid transport and metabolism ;
unigene_c1947	KOG2382	Predicted alpha/beta hydrolase	R	General function prediction only ;
unigene_c1948	KOG0475	Cl- channel CLC-3 and related proteins (CLC superfamily)	P	Inorganic ion transport and metabolism ;
unigene_c1950	KOG0626	Beta-glucosidase, lactase phlorizinhydrolase, and related proteins	G	Carbohydrate transport and metabolism ;
unigene_c1951	KOG3682	Predicted membrane protein (associated with esophageal cancer in humans)	S	Function unknown ;
unigene_c1954	KOG1913	Regucalcin gene promoter region-related protein (RGPR)	K	Transcription ;
unigene_c1955	KOG2509	Seryl-tRNA synthetase	J	Translation, ribosomal structure and biogenesis ;
unigene_c1956	KOG2605	OTU (ovarian tumor)-like cysteine protease	TO	Signal transduction mechanisms ; Posttranslational modification, protein turnover, chaperones ;
unigene_c1957	KOG1187	Serine/threonine protein kinase	T	Signal transduction mechanisms ;
unigene_c1958	KOG1889	Putative phosphoinositide phosphatase	I	Lipid transport and metabolism ;
unigene_c1960	KOG0583	Serine/threonine protein kinase	T	Signal transduction mechanisms ;
unigene_c1962	KOG1079	Transcriptional repressor EZH1	K	Transcription ;
unigene_c1964	KOG1187	Serine/threonine protein kinase	T	Signal transduction mechanisms ;
unigene_c1965	KOG1609	Protein involved in mRNA turnover and stability	A	RNA processing and modification ;
unigene_c1966	KOG2569	G protein-coupled seven transmembrane receptor	T	Signal transduction mechanisms ;
unigene_c1967	KOG0627	Heat shock transcription factor	K	Transcription ;
unigene_c1971	KOG0032	Ca2+/calmodulin-dependent protein kinase, EF-Hand protein superfamily	T	Signal transduction mechanisms ;
unigene_c1973	KOG1321	Protoheme ferro-lyase (ferrochelatase)	H	Coenzyme transport and metabolism ;
unigene_c1974	KOG3589	G protein signaling regulators	T	Signal transduction mechanisms ;
unigene_c1975	KOG2323	Pyruvate kinase	G	Carbohydrate transport and metabolism ;
unigene_c1976	KOG0519	Sensory transduction histidine kinase	T	Signal transduction mechanisms ;
unigene_c1977	KOG1034	Transcriptional repressor EED/ESC/FIE, required for transcriptional silencing, WD repeat superfamily	K	Transcription ;
unigene_c1978	KOG0204	Calcium transporting ATPase	P	Inorganic ion transport and metabolism ;
unigene_c1982	KOG4302	Microtubule-associated protein essential for anaphase spindle elongation	DZ	Cell cycle control, cell division, chromosome partitioning ; Cytoskeleton ;
unigene_c1983	KOG1444	Nucleotide-sugar transporter VRG4/SQV-7	GOU	Carbohydrate transport and metabolism ; Posttranslational modification, protein turnover, chaperones ; Intracellular trafficking, secretion, and vesicular transport ;
unigene_c1984	KOG0698	Serine/threonine protein phosphatase	T	Signal transduction mechanisms ;
unigene_c1986	KOG2007	Cysteinyl-tRNA synthetase	J	Translation, ribosomal structure and biogenesis ;
unigene_c1988	KOG4197	FOG: PPR repeat	R	General function prediction only ;
unigene_c1990	KOG1339	Aspartyl protease	O	Posttranslational modification, protein turnover, chaperones ;
unigene_c1992	KOG0773	Transcription factor MEIS1 and related HOX domain proteins	K	Transcription ;
unigene_c1993	KOG1474	Transcription initiation factor TFIID, subunit BDF1 and related bromodomain proteins	K	Transcription ;
unigene_c1997	KOG1187	Serine/threonine protein kinase	T	Signal transduction mechanisms ;
unigene_c1998	KOG0676	Actin and related proteins	Z	Cytoskeleton ;
unigene_c1999	KOG4197	FOG: PPR repeat	R	General function prediction only ;
unigene_c2000	KOG2864	Nuclear division RFT1 protein	D	Cell cycle control, cell division, chromosome partitioning ;
unigene_c2004	KOG1290	Serine/threonine protein kinase	T	Signal transduction mechanisms ;
unigene_c2006	KOG1950	Glycosyl transferase, family 8 - glycogenin	G	Carbohydrate transport and metabolism ;
unigene_c2008	KOG0684	Cytochrome P450	Q	Secondary metabolites biosynthesis, transport and catabolism ;
unigene_c2009	KOG2100	Dipeptidyl aminopeptidase	O	Posttranslational modification, protein turnover, chaperones ;
unigene_c2010	KOG1484	Putative Zn2+ transporter MSC2 (cation diffusion facilitator superfamily)	P	Inorganic ion transport and metabolism ;
unigene_c2014	KOG2068	MOT2 transcription factor	K	Transcription ;
unigene_c2015	KOG1320	Serine protease	O	Posttranslational modification, protein turnover, chaperones ;
unigene_c2016	KOG2058	Ypt/Rab GTPase activating protein	U	Intracellular trafficking, secretion, and vesicular transport ;
unigene_c2019	KOG2517	Ribulose kinase and related carbohydrate kinases	G	Carbohydrate transport and metabolism ;
unigene_c2021	KOG0136	Acyl-CoA oxidase	I	Lipid transport and metabolism ;
unigene_c2022	KOG0116	RasGAP SH3 binding protein rasputin, contains NTF2 and RRM domains	T	Signal transduction mechanisms ;
unigene_c2023	KOG0228	Beta-fructofuranosidase (invertase)	G	Carbohydrate transport and metabolism ;
unigene_c2025	KOG3180	Electron transfer flavoprotein, beta subunit	C	Energy production and conversion ;
unigene_c2026	KOG3020	TatD-related DNase	L	Replication, recombination and repair ;
unigene_c2027	KOG0216	RNA polymerase I, second largest subunit	K	Transcription ;
unigene_c2028	KOG2323	Pyruvate kinase	G	Carbohydrate transport and metabolism ;
unigene_c2029	KOG0660	Mitogen-activated protein kinase	T	Signal transduction mechanisms ;
unigene_c2030	KOG0600	Cdc2-related protein kinase	D	Cell cycle control, cell division, chromosome partitioning ;
unigene_c2031	KOG0802	E3 ubiquitin ligase	O	Posttranslational modification, protein turnover, chaperones ;
unigene_c2032	KOG0032	Ca2+/calmodulin-dependent protein kinase, EF-Hand protein superfamily	T	Signal transduction mechanisms ;
unigene_c2033	KOG2012	Ubiquitin activating enzyme UBA1	O	Posttranslational modification, protein turnover, chaperones ;
unigene_c2035	KOG2171	Karyopherin (importin) beta 3	YU	Nuclear structure ; Intracellular trafficking, secretion, and vesicular transport ;
unigene_c2037	KOG0192	Tyrosine kinase specific for activated (GTP-bound) p21cdc42Hs	T	Signal transduction mechanisms ;
unigene_c2039	KOG1525	Sister chromatid cohesion complex Cohesin, subunit PDS5	D	Cell cycle control, cell division, chromosome partitioning ;
unigene_c2040	KOG1789	Endocytosis protein RME-8, contains DnaJ domain	UO	Intracellular trafficking, secretion, and vesicular transport ; Posttranslational modification, protein turnover, chaperones ;
unigene_c2041	KOG0519	Sensory transduction histidine kinase	T	Signal transduction mechanisms ;
unigene_c2042	KOG1047	Bifunctional leukotriene A4 hydrolase/aminopeptidase LTA4H	IOVE	Lipid transport and metabolism ; Posttranslational modification, protein turnover, chaperones ; Defense mechanisms ; Amino acid transport and metabolism ;
unigene_c2044	KOG1371	UDP-glucose 4-epimerase/UDP-sulfoquinovose synthase	M	Cell wall/membrane/envelope biogenesis ;
unigene_c2045	KOG1947	Leucine rich repeat proteins, some proteins contain F-box	R	General function prediction only ;
unigene_c2046	KOG1065	Maltase glucoamylase and related hydrolases, glycosyl hydrolase family 31	G	Carbohydrate transport and metabolism ;
unigene_c2048	KOG2578	Transcription factor E2F/dimerization partner (TDP)-like proteins	K	Transcription ;
unigene_c2050	KOG4600	Mitochondrial ribosomal protein MRP7 (L2)	J	Translation, ribosomal structure and biogenesis ;
unigene_c2051	KOG1650	Predicted K+/H+-antiporter	P	Inorganic ion transport and metabolism ;
unigene_c2052	KOG0714	Molecular chaperone (DnaJ superfamily)	O	Posttranslational modification, protein turnover, chaperones ;
unigene_c2053	KOG0276	Vesicle coat complex COPI, beta' subunit	U	Intracellular trafficking, secretion, and vesicular transport ;
unigene_c2055	KOG0068	D-3-phosphoglycerate dehydrogenase, D-isomer-specific 2-hydroxy acid dehydrogenase superfamily	E	Amino acid transport and metabolism ;
unigene_c2059	KOG0702	Predicted GTPase-activating protein	T	Signal transduction mechanisms ;
unigene_c2060	KOG2190	PolyC-binding proteins alphaCP-1 and related KH domain proteins	AR	RNA processing and modification ; General function prediction only ;
unigene_c2062	KOG0800	FOG: Predicted E3 ubiquitin ligase	O	Posttranslational modification, protein turnover, chaperones ;
unigene_c2063	KOG1880	Nuclear inhibitor of phosphatase-1	R	General function prediction only ;
unigene_c2065	KOG0133	Deoxyribodipyrimidine photolyase/cryptochrome	LT	Replication, recombination and repair ; Signal transduction mechanisms ;
unigene_c2066	KOG0924	mRNA splicing factor ATP-dependent RNA helicase	A	RNA processing and modification ;
unigene_c2067	KOG0673	Thymidylate synthase	F	Nucleotide transport and metabolism ;
unigene_c2068	KOG1915	Cell cycle control protein (crooked neck)	D	Cell cycle control, cell division, chromosome partitioning ;
unigene_c2069	KOG1454	Predicted hydrolase/acyltransferase (alpha/beta hydrolase superfamily)	R	General function prediction only ;
unigene_c2072	KOG3075	Ribose 5-phosphate isomerase	G	Carbohydrate transport and metabolism ;
unigene_c2073	KOG2822	Sphingoid base-phosphate phosphatase	I	Lipid transport and metabolism ;
unigene_c2074	KOG0338	ATP-dependent RNA helicase	A	RNA processing and modification ;
unigene_c2076	KOG0520	Uncharacterized conserved protein, contains IPT/TIG domain	S	Function unknown ;
unigene_c2077	KOG1426	FOG: RCC1 domain	S	Function unknown ;
unigene_c2079	KOG0297	TNF receptor-associated factor	T	Signal transduction mechanisms ;
unigene_c2081	KOG1291	Mn2+ and Fe2+ transporters of the NRAMP family	P	Inorganic ion transport and metabolism ;
unigene_c2084	KOG2011	Sister chromatid cohesion complex Cohesin, subunit STAG/IRR1/SCC3	D	Cell cycle control, cell division, chromosome partitioning ;
unigene_c2085	KOG1235	Predicted unusual protein kinase	R	General function prediction only ;
unigene_c2086	KOG1454	Predicted hydrolase/acyltransferase (alpha/beta hydrolase superfamily)	R	General function prediction only ;
unigene_c2087	KOG1082	Histone H3 (Lys9) methyltransferase SUV39H1/Clr4, required for transcriptional silencing	BK	Chromatin structure and dynamics ; Transcription ;
unigene_c2088	KOG4225	Sorbin and SH3 domain-containing protein	T	Signal transduction mechanisms ;
unigene_c2090	KOG0319	WD40-repeat-containing subunit of the 18S rRNA processing complex	A	RNA processing and modification ;
unigene_c2093	KOG0156	Cytochrome P450 CYP2 subfamily	Q	Secondary metabolites biosynthesis, transport and catabolism ;
unigene_c2096	KOG0143	Iron/ascorbate family oxidoreductases	QR	Secondary metabolites biosynthesis, transport and catabolism ; General function prediction only ;
unigene_c2097	KOG1502	Flavonol reductase/cinnamoyl-CoA reductase	V	Defense mechanisms ;
unigene_c2098	KOG1684	Enoyl-CoA hydratase	I	Lipid transport and metabolism ;
unigene_c2099	KOG1540	Ubiquinone biosynthesis methyltransferase COQ5	H	Coenzyme transport and metabolism ;
unigene_c2100	KOG2335	tRNA-dihydrouridine synthase	J	Translation, ribosomal structure and biogenesis ;
unigene_c2101	KOG1187	Serine/threonine protein kinase	T	Signal transduction mechanisms ;
unigene_c2102	KOG1187	Serine/threonine protein kinase	T	Signal transduction mechanisms ;
unigene_c2105	KOG0741	AAA+-type ATPase	O	Posttranslational modification, protein turnover, chaperones ;
unigene_c2107	KOG2525	Folylpolyglutamate synthase	H	Coenzyme transport and metabolism ;
unigene_c2108	KOG1237	H+/oligopeptide symporter	E	Amino acid transport and metabolism ;
unigene_c2109	KOG1192	UDP-glucuronosyl and UDP-glucosyl transferase	GC	Carbohydrate transport and metabolism ; Energy production and conversion ;
unigene_c2112	KOG2662	Magnesium transporters: CorA family	P	Inorganic ion transport and metabolism ;
unigene_c2114	KOG1187	Serine/threonine protein kinase	T	Signal transduction mechanisms ;
unigene_c2115	KOG0557	Dihydrolipoamide acetyltransferase	C	Energy production and conversion ;
unigene_c2116	KOG0519	Sensory transduction histidine kinase	T	Signal transduction mechanisms ;
unigene_c2117	KOG0627	Heat shock transcription factor	K	Transcription ;
unigene_c2118	KOG3196	NADH:ubiquinone oxidoreductase, NDUFV2/24 kD subunit	C	Energy production and conversion ;
unigene_c2119	KOG1278	Endosomal membrane proteins, EMP70	U	Intracellular trafficking, secretion, and vesicular transport ;
unigene_c2120	KOG1187	Serine/threonine protein kinase	T	Signal transduction mechanisms ;
unigene_c2121	KOG1279	Chromatin remodeling factor subunit and related transcription factors	B	Chromatin structure and dynamics ;
unigene_c2122	KOG0274	Cdc4 and related F-box and WD-40 proteins	R	General function prediction only ;
unigene_c2123	KOG1356	Putative transcription factor 5qNCA, contains JmjC domain	K	Transcription ;
unigene_c2124	KOG0519	Sensory transduction histidine kinase	T	Signal transduction mechanisms ;
unigene_c2125	KOG4332	Predicted sugar transporter	G	Carbohydrate transport and metabolism ;
unigene_c2126	KOG2130	Phosphatidylserine-specific receptor PtdSerR, contains JmjC domain	BT	Chromatin structure and dynamics ; Signal transduction mechanisms ;
unigene_c2127	KOG1594	Uncharacterized enzymes related to aldose 1-epimerase	G	Carbohydrate transport and metabolism ;
unigene_c2128	KOG0204	Calcium transporting ATPase	P	Inorganic ion transport and metabolism ;
unigene_c2129	KOG1356	Putative transcription factor 5qNCA, contains JmjC domain	K	Transcription ;
unigene_c2130	KOG0167	FOG: Armadillo/beta-catenin-like repeats	S	Function unknown ;
unigene_c2133	KOG1192	UDP-glucuronosyl and UDP-glucosyl transferase	GC	Carbohydrate transport and metabolism ; Energy production and conversion ;
unigene_c2134	KOG3178	Hydroxyindole-O-methyltransferase and related SAM-dependent methyltransferases	R	General function prediction only ;
unigene_c2135	KOG0156	Cytochrome P450 CYP2 subfamily	Q	Secondary metabolites biosynthesis, transport and catabolism ;
unigene_c2136	KOG1187	Serine/threonine protein kinase	T	Signal transduction mechanisms ;
unigene_c2137	KOG2480	3-hydroxy-3-methylglutaryl-CoA (HMG-CoA) reductase	I	Lipid transport and metabolism ;
unigene_c2139	KOG2150	CCR4-NOT transcriptional regulation complex, NOT5 subunit	K	Transcription ;
unigene_c2140	KOG1674	Cyclin	R	General function prediction only ;
unigene_c2141	KOG2423	Nucleolar GTPase	R	General function prediction only ;
unigene_c2142	KOG0032	Ca2+/calmodulin-dependent protein kinase, EF-Hand protein superfamily	T	Signal transduction mechanisms ;
unigene_c2143	KOG0228	Beta-fructofuranosidase (invertase)	G	Carbohydrate transport and metabolism ;
unigene_c2144	KOG1192	UDP-glucuronosyl and UDP-glucosyl transferase	GC	Carbohydrate transport and metabolism ; Energy production and conversion ;
unigene_c2145	KOG0054	Multidrug resistance-associated protein/mitoxantrone resistance protein, ABC superfamily	Q	Secondary metabolites biosynthesis, transport and catabolism ;
unigene_c2146	KOG0583	Serine/threonine protein kinase	T	Signal transduction mechanisms ;
unigene_c2147	KOG1176	Acyl-CoA synthetase	I	Lipid transport and metabolism ;
unigene_c2148	KOG2765	Predicted membrane protein	S	Function unknown ;
unigene_c2149	KOG2498	IK cytokine down-regulator of HLA class II	T	Signal transduction mechanisms ;
unigene_c2150	KOG1306	Ca2+/Na+ exchanger NCX1 and related proteins	PT	Inorganic ion transport and metabolism ; Signal transduction mechanisms ;
unigene_c2152	KOG0927	Predicted transporter (ABC superfamily)	R	General function prediction only ;
unigene_c2154	KOG0317	Predicted E3 ubiquitin ligase, integral peroxisomal membrane protein	O	Posttranslational modification, protein turnover, chaperones ;
unigene_c2155	KOG2176	Exocyst complex, subunit SEC15	U	Intracellular trafficking, secretion, and vesicular transport ;
unigene_c2156	KOG1187	Serine/threonine protein kinase	T	Signal transduction mechanisms ;
unigene_c2157	KOG0542	Predicted exonuclease	L	Replication, recombination and repair ;
unigene_c2159	KOG3914	WD repeat protein WDR4	S	Function unknown ;
unigene_c2163	KOG1279	Chromatin remodeling factor subunit and related transcription factors	B	Chromatin structure and dynamics ;
unigene_c2164	KOG0550	Molecular chaperone (DnaJ superfamily)	O	Posttranslational modification, protein turnover, chaperones ;
unigene_c2166	KOG1404	Alanine-glyoxylate aminotransferase AGT2	E	Amino acid transport and metabolism ;
unigene_c2167	KOG1237	H+/oligopeptide symporter	E	Amino acid transport and metabolism ;
unigene_c2168	KOG1112	Ribonucleotide reductase, alpha subunit	F	Nucleotide transport and metabolism ;
unigene_c2169	KOG0335	ATP-dependent RNA helicase	A	RNA processing and modification ;
unigene_c2170	KOG0955	PHD finger protein BR140/LIN-49	R	General function prediction only ;
unigene_c2171	KOG0207	Cation transport ATPase	P	Inorganic ion transport and metabolism ;
unigene_c2173	KOG0389	SNF2 family DNA-dependent ATPase	B	Chromatin structure and dynamics ;
unigene_c2174	KOG2467	Glycine/serine hydroxymethyltransferase	E	Amino acid transport and metabolism ;
unigene_c2175	KOG1303	Amino acid transporters	E	Amino acid transport and metabolism ;
unigene_c2176	KOG2476	Uncharacterized conserved protein	S	Function unknown ;
unigene_c2177	KOG2442	Uncharacterized conserved protein, contains PA domain	R	General function prediction only ;
unigene_c2179	KOG2023	Nuclear transport receptor Karyopherin-beta2/Transportin (importin beta superfamily)	YU	Nuclear structure ; Intracellular trafficking, secretion, and vesicular transport ;
unigene_c2180	KOG2002	TPR-containing nuclear phosphoprotein that regulates K(+) uptake	P	Inorganic ion transport and metabolism ;
unigene_c2182	KOG0636	ATP sulfurylase (sulfate adenylyltransferase)	P	Inorganic ion transport and metabolism ;
unigene_c2183	KOG2670	Enolase	G	Carbohydrate transport and metabolism ;
unigene_c2184	KOG0800	FOG: Predicted E3 ubiquitin ligase	O	Posttranslational modification, protein turnover, chaperones ;
unigene_c2185	KOG4725	Uncharacterized conserved protein	S	Function unknown ;
unigene_c2186	KOG1285	Beta, beta-carotene 15,15'-dioxygenase and related enzymes	Q	Secondary metabolites biosynthesis, transport and catabolism ;
unigene_c2188	KOG1072	FOG: Kelch repeat	R	General function prediction only ;
unigene_c2190	KOG1240	Protein kinase containing WD40 repeats	T	Signal transduction mechanisms ;
unigene_c2193	KOG2111	Uncharacterized conserved protein, contains WD40 repeats	S	Function unknown ;
unigene_c2194	KOG1528	Salt-sensitive 3'-phosphoadenosine-5'-phosphatase HAL2/SAL1	FP	Nucleotide transport and metabolism ; Inorganic ion transport and metabolism ;
unigene_c2197	KOG2066	Vacuolar assembly/sorting protein VPS41	U	Intracellular trafficking, secretion, and vesicular transport ;
unigene_c2198	KOG0737	AAA+-type ATPase	O	Posttranslational modification, protein turnover, chaperones ;
unigene_c2199	KOG1577	Aldo/keto reductase family proteins	R	General function prediction only ;
unigene_c2200	KOG1804	RNA helicase	A	RNA processing and modification ;
unigene_c2201	KOG0929	Guanine nucleotide exchange factor	U	Intracellular trafficking, secretion, and vesicular transport ;
unigene_c2203	KOG4732	Uncharacterized conserved protein	S	Function unknown ;
unigene_c2204	KOG1628	40S ribosomal protein S3A	J	Translation, ribosomal structure and biogenesis ;
unigene_c2205	KOG4750	Serine O-acetyltransferase	E	Amino acid transport and metabolism ;
unigene_c2206	KOG1901	Uncharacterized high-glucose-regulated protein	R	General function prediction only ;
unigene_c2208	KOG0082	G-protein alpha subunit (small G protein superfamily)	DT	Cell cycle control, cell division, chromosome partitioning ; Signal transduction mechanisms ;
unigene_c2209	KOG0698	Serine/threonine protein phosphatase	T	Signal transduction mechanisms ;
unigene_c2211	KOG2399	K+-dependent Na+:Ca2+ antiporter	P	Inorganic ion transport and metabolism ;
unigene_c2213	KOG1305	Amino acid transporter protein	E	Amino acid transport and metabolism ;
unigene_c2214	KOG0619	FOG: Leucine rich repeat	R	General function prediction only ;
unigene_c2215	KOG1187	Serine/threonine protein kinase	T	Signal transduction mechanisms ;
unigene_c2217	KOG1160	Fe-S oxidoreductase	C	Energy production and conversion ;
unigene_c2219	KOG0698	Serine/threonine protein phosphatase	T	Signal transduction mechanisms ;
unigene_c2220	KOG0032	Ca2+/calmodulin-dependent protein kinase, EF-Hand protein superfamily	T	Signal transduction mechanisms ;
unigene_c2221	KOG2241	tRNA-binding protein	J	Translation, ribosomal structure and biogenesis ;
unigene_c2223	KOG1605	TFIIF-interacting CTD phosphatase, including NLI-interacting factor (involved in RNA polymerase II regulation)	K	Transcription ;
unigene_c2224	KOG0656	G1/S-specific cyclin D	D	Cell cycle control, cell division, chromosome partitioning ;
unigene_c2227	KOG0160	Myosin class V heavy chain	Z	Cytoskeleton ;
unigene_c2229	KOG1462	Translation initiation factor 2B, gamma subunit (eIF-2Bgamma/GCD1)	J	Translation, ribosomal structure and biogenesis ;
unigene_c2230	KOG2394	WD40 protein DMR-N9	R	General function prediction only ;
unigene_c2232	KOG1400	Predicted ATP-dependent protease PIL, contains LON domain	R	General function prediction only ;
unigene_c2233	KOG2515	Mannosyltransferase	MU	Cell wall/membrane/envelope biogenesis ; Intracellular trafficking, secretion, and vesicular transport ;
unigene_c2234	KOG4344	Uncharacterized conserved protein	S	Function unknown ;
unigene_c2236	KOG2413	Xaa-Pro aminopeptidase	E	Amino acid transport and metabolism ;
unigene_c2238	KOG0205	Plasma membrane H+-transporting ATPase	P	Inorganic ion transport and metabolism ;
unigene_c2239	KOG1851	Uncharacterized conserved protein	S	Function unknown ;
unigene_c2241	KOG2164	Predicted E3 ubiquitin ligase	O	Posttranslational modification, protein turnover, chaperones ;
unigene_c2242	KOG2817	Predicted E3 ubiquitin ligase	O	Posttranslational modification, protein turnover, chaperones ;
unigene_c2243	KOG0206	P-type ATPase	R	General function prediction only ;
unigene_c2247	KOG4197	FOG: PPR repeat	R	General function prediction only ;
unigene_c2249	KOG0927	Predicted transporter (ABC superfamily)	R	General function prediction only ;
unigene_c2250	KOG4648	Uncharacterized conserved protein, contains LRR repeats	S	Function unknown ;
unigene_c2251	KOG3454	U1 snRNP-specific protein C	A	RNA processing and modification ;
unigene_c2252	KOG0023	Alcohol dehydrogenase, class V	Q	Secondary metabolites biosynthesis, transport and catabolism ;
unigene_c2253	KOG0946	ER-Golgi vesicle-tethering protein p115	U	Intracellular trafficking, secretion, and vesicular transport ;
unigene_c2255	KOG2037	Guanylate-binding protein	R	General function prediction only ;
unigene_c2256	KOG1249	Predicted GTPases	R	General function prediction only ;
unigene_c2258	KOG1416	tRNA(1-methyladenosine) methyltransferase, subunit GCD10	J	Translation, ribosomal structure and biogenesis ;
unigene_c2259	KOG0698	Serine/threonine protein phosphatase	T	Signal transduction mechanisms ;
unigene_c2260	KOG2502	Tub family proteins	R	General function prediction only ;
unigene_c2263	KOG0292	Vesicle coat complex COPI, alpha subunit	U	Intracellular trafficking, secretion, and vesicular transport ;
unigene_c2265	KOG1987	Speckle-type POZ protein SPOP and related proteins with TRAF, MATH and BTB/POZ domains	DR	Cell cycle control, cell division, chromosome partitioning ; General function prediction only ;
unigene_c2266	KOG2744	DNA-binding proteins Bright/BRCAA1/RBP1 and related proteins containing BRIGHT domain	K	Transcription ;
unigene_c2267	KOG1187	Serine/threonine protein kinase	T	Signal transduction mechanisms ;
unigene_c2268	KOG1626	Inorganic pyrophosphatase/Nucleosome remodeling factor, subunit NURF38	C	Energy production and conversion ;
unigene_c2269	KOG1470	Phosphatidylinositol transfer protein PDR16 and related proteins	I	Lipid transport and metabolism ;
unigene_c2273	KOG1902	Putative signal transduction protein involved in RNA splicing	TA	Signal transduction mechanisms ; RNA processing and modification ;
unigene_c2274	KOG0737	AAA+-type ATPase	O	Posttranslational modification, protein turnover, chaperones ;
unigene_c2278	KOG0916	1,3-beta-glucan synthase/callose synthase catalytic subunit	M	Cell wall/membrane/envelope biogenesis ;
unigene_c2279	KOG4197	FOG: PPR repeat	R	General function prediction only ;
unigene_c2280	KOG4282	Transcription factor GT-2 and related proteins, contains trihelix DNA-binding/SANT domain	K	Transcription ;
unigene_c2281	KOG1815	Predicted E3 ubiquitin ligase	O	Posttranslational modification, protein turnover, chaperones ;
unigene_c2282	KOG0724	Zuotin and related molecular chaperones (DnaJ superfamily), contains DNA-binding domains	O	Posttranslational modification, protein turnover, chaperones ;
unigene_c2284	KOG0720	Molecular chaperone (DnaJ superfamily)	O	Posttranslational modification, protein turnover, chaperones ;
unigene_c2285	KOG2913	Predicted membrane protein	S	Function unknown ;
unigene_c2287	KOG0731	AAA+-type ATPase containing the peptidase M41 domain	O	Posttranslational modification, protein turnover, chaperones ;
unigene_c2289	KOG0698	Serine/threonine protein phosphatase	T	Signal transduction mechanisms ;
unigene_c2291	KOG2502	Tub family proteins	R	General function prediction only ;
unigene_c2292	KOG4205	RNA-binding protein musashi/mRNA cleavage and polyadenylation factor I complex, subunit HRP1	A	RNA processing and modification ;
unigene_c2293	KOG3937	mRNA splicing factor	A	RNA processing and modification ;
unigene_c2294	KOG1532	GTPase XAB1, interacts with DNA repair protein XPA	L	Replication, recombination and repair ;
unigene_c2295	KOG0054	Multidrug resistance-associated protein/mitoxantrone resistance protein, ABC superfamily	Q	Secondary metabolites biosynthesis, transport and catabolism ;
unigene_c2298	KOG1119	Mitochondrial Fe-S cluster biosynthesis protein ISA2 (contains a HesB-like domain)	CU	Energy production and conversion ; Intracellular trafficking, secretion, and vesicular transport ;
unigene_c2300	KOG3088	Secretory carrier membrane protein	U	Intracellular trafficking, secretion, and vesicular transport ;
unigene_c2301	KOG2220	Predicted signal transduction protein	R	General function prediction only ;
unigene_c2306	KOG2718	Na+-bile acid cotransporter	P	Inorganic ion transport and metabolism ;
unigene_c2307	KOG0032	Ca2+/calmodulin-dependent protein kinase, EF-Hand protein superfamily	T	Signal transduction mechanisms ;
unigene_c2308	KOG1187	Serine/threonine protein kinase	T	Signal transduction mechanisms ;
unigene_c2309	KOG4231	Intracellular membrane-bound Ca2+-independent phospholipase A2	I	Lipid transport and metabolism ;
unigene_c2311	KOG1364	Predicted ubiquitin regulatory protein, contains UAS and UBX domains	O	Posttranslational modification, protein turnover, chaperones ;
unigene_c2313	KOG1105	Transcription elongation factor TFIIS/Cofactor of enhancer-binding protein Sp1	K	Transcription ;
unigene_c2314	KOG2245	Poly(A) polymerase and related nucleotidyltransferases	A	RNA processing and modification ;
unigene_c2316	KOG1601	GATA-4/5/6 transcription factors	K	Transcription ;
unigene_c2317	KOG2402	Paf1/RNA polymerase II complex, RTF1 component (involved in regulation of TATA box-binding protein)	K	Transcription ;
unigene_c2319	KOG3329	RAN guanine nucleotide release factor	T	Signal transduction mechanisms ;
unigene_c2322	KOG1051	Chaperone HSP104 and related ATP-dependent Clp proteases	O	Posttranslational modification, protein turnover, chaperones ;
unigene_c2323	KOG4266	Subtilisin kexin isozyme-1/site 1 protease, subtilase superfamily	O	Posttranslational modification, protein turnover, chaperones ;
unigene_c2325	KOG2066	Vacuolar assembly/sorting protein VPS41	U	Intracellular trafficking, secretion, and vesicular transport ;
unigene_c2326	KOG4197	FOG: PPR repeat	R	General function prediction only ;
unigene_c2327	KOG0222	Phenylalanine and histidine ammonia-lyase	Q	Secondary metabolites biosynthesis, transport and catabolism ;
unigene_c2329	KOG2082	K+/Cl- cotransporter KCC1 and related transporters	P	Inorganic ion transport and metabolism ;
unigene_c2330	KOG4658	Apoptotic ATPase	T	Signal transduction mechanisms ;
unigene_c2331	KOG0974	WD-repeat protein WDR6, WD repeat superfamily	R	General function prediction only ;
unigene_c2332	KOG2977	Glycosyltransferase	R	General function prediction only ;
unigene_c2333	KOG0838	RNA Methylase, SpoU family	A	RNA processing and modification ;
unigene_c2334	KOG2345	Serine/threonine protein kinase/TGF-beta stimulated factor	KIT	Transcription ; Lipid transport and metabolism ; Signal transduction mechanisms ;
unigene_c2335	KOG1888	Putative phosphoinositide phosphatase	I	Lipid transport and metabolism ;
unigene_c2340	KOG2063	Vacuolar assembly/sorting proteins VPS39/VAM6/VPS3	U	Intracellular trafficking, secretion, and vesicular transport ;
unigene_c2341	KOG1429	dTDP-glucose 4-6-dehydratase/UDP-glucuronic acid decarboxylase	GM	Carbohydrate transport and metabolism ; Cell wall/membrane/envelope biogenesis ;
unigene_c2342	KOG2731	DNA alkylation damage repair protein	A	RNA processing and modification ;
unigene_c2344	KOG1933	Cholesterol transport protein (Niemann-Pick C disease protein)	I	Lipid transport and metabolism ;
unigene_c2345	KOG2956	CLIP-associating protein	R	General function prediction only ;
unigene_c2347	KOG4372	Predicted alpha/beta hydrolase	R	General function prediction only ;
unigene_c2349	KOG1764	5'-AMP-activated protein kinase, gamma subunit	C	Energy production and conversion ;
unigene_c2350	KOG2314	Translation initiation factor 3, subunit b (eIF-3b)	J	Translation, ribosomal structure and biogenesis ;
unigene_c2351	KOG0767	Mitochondrial phosphate carrier protein	C	Energy production and conversion ;
unigene_c2352	KOG0768	Mitochondrial carrier protein PET8	C	Energy production and conversion ;
unigene_c2353	KOG1159	NADP-dependent flavoprotein reductase	C	Energy production and conversion ;
unigene_c2354	KOG0110	RNA-binding protein (RRM superfamily)	R	General function prediction only ;
unigene_c2358	KOG0800	FOG: Predicted E3 ubiquitin ligase	O	Posttranslational modification, protein turnover, chaperones ;
unigene_c2360	KOG2992	Nucleolar GTPase/ATPase p130	Y	Nuclear structure ;
unigene_c2362	KOG1334	WD40 repeat protein	R	General function prediction only ;
unigene_c2363	KOG1041	Translation initiation factor 2C (eIF-2C) and related proteins	J	Translation, ribosomal structure and biogenesis ;
unigene_c2364	KOG0743	AAA+-type ATPase	O	Posttranslational modification, protein turnover, chaperones ;
unigene_c2365	KOG1601	GATA-4/5/6 transcription factors	K	Transcription ;
unigene_c2367	KOG1121	Tam3-transposase (Ac family)	L	Replication, recombination and repair ;
unigene_c2368	KOG1164	Casein kinase (serine/threonine/tyrosine protein kinase)	T	Signal transduction mechanisms ;
unigene_c2373	KOG1187	Serine/threonine protein kinase	T	Signal transduction mechanisms ;
unigene_c2374	KOG0626	Beta-glucosidase, lactase phlorizinhydrolase, and related proteins	G	Carbohydrate transport and metabolism ;
unigene_c2375	KOG2855	Ribokinase	G	Carbohydrate transport and metabolism ;
unigene_c2378	KOG0017	FOG: Transposon-encoded proteins with TYA, reverse transcriptase, integrase domains in various combinations	R	General function prediction only ;
unigene_c2379	KOG2603	Oligosaccharyltransferase, gamma subunit	O	Posttranslational modification, protein turnover, chaperones ;
unigene_c2380	KOG2533	Permease of the major facilitator superfamily	G	Carbohydrate transport and metabolism ;
unigene_c2381	KOG1883	Cofactor required for Sp1 transcriptional activation, subunit 3	K	Transcription ;
unigene_c2383	KOG3206	Alpha-tubulin folding cofactor B	O	Posttranslational modification, protein turnover, chaperones ;
unigene_c2384	KOG2015	NEDD8-activating complex, catalytic component UBA3	O	Posttranslational modification, protein turnover, chaperones ;
unigene_c2387	KOG0167	FOG: Armadillo/beta-catenin-like repeats	S	Function unknown ;
unigene_c2390	KOG2557	Uncharacterized conserved protein, contains TLDc domain	S	Function unknown ;
unigene_c2391	KOG3096	Spliceosome-associated coiled-coil protein	S	Function unknown ;
unigene_c2392	KOG2298	Glycyl-tRNA synthetase and related class II tRNA synthetase	J	Translation, ribosomal structure and biogenesis ;
unigene_c2393	KOG2274	Predicted importin 9	UY	Intracellular trafficking, secretion, and vesicular transport ; Nuclear structure ;
unigene_c2395	KOG2940	Predicted methyltransferase	R	General function prediction only ;
unigene_c2396	KOG1840	Kinesin light chain	Z	Cytoskeleton ;
unigene_c2397	KOG1348	Asparaginyl peptidases	O	Posttranslational modification, protein turnover, chaperones ;
unigene_c2399	KOG0387	Transcription-coupled repair protein CSB/RAD26 (contains SNF2 family DNA-dependent ATPase domain)	KL	Transcription ; Replication, recombination and repair ;
unigene_c2402	KOG1475	Ribosomal protein RPL1/RPL2/RL4L4	A	RNA processing and modification ;
unigene_c2403	KOG4842	Protein involved in sister chromatid separation and/or segregation	D	Cell cycle control, cell division, chromosome partitioning ;
unigene_c2404	KOG0168	Putative ubiquitin fusion degradation protein	O	Posttranslational modification, protein turnover, chaperones ;
unigene_c2405	KOG1947	Leucine rich repeat proteins, some proteins contain F-box	R	General function prediction only ;
unigene_c2406	KOG0167	FOG: Armadillo/beta-catenin-like repeats	S	Function unknown ;
unigene_c2408	KOG2440	Pyrophosphate-dependent phosphofructo-1-kinase	G	Carbohydrate transport and metabolism ;
unigene_c2409	KOG0698	Serine/threonine protein phosphatase	T	Signal transduction mechanisms ;
unigene_c2410	KOG4344	Uncharacterized conserved protein	S	Function unknown ;
unigene_c2411	KOG3126	Porin/voltage-dependent anion-selective channel protein	P	Inorganic ion transport and metabolism ;
unigene_c2412	KOG1650	Predicted K+/H+-antiporter	P	Inorganic ion transport and metabolism ;
unigene_c2416	KOG1394	3-oxoacyl-(acyl-carrier-protein) synthase (I and II)	IQ	Lipid transport and metabolism ; Secondary metabolites biosynthesis, transport and catabolism ;
unigene_c2418	KOG0720	Molecular chaperone (DnaJ superfamily)	O	Posttranslational modification, protein turnover, chaperones ;
unigene_c2423	KOG0619	FOG: Leucine rich repeat	R	General function prediction only ;
unigene_c2425	KOG1965	Sodium/hydrogen exchanger protein	P	Inorganic ion transport and metabolism ;
unigene_c2426	KOG2842	Interferon-related protein PC4 like	Z	Cytoskeleton ;
unigene_c2429	KOG1187	Serine/threonine protein kinase	T	Signal transduction mechanisms ;
unigene_c2430	KOG1919	RNA pseudouridylate synthases	A	RNA processing and modification ;
unigene_c2432	KOG2167	Cullins	D	Cell cycle control, cell division, chromosome partitioning ;
unigene_c2433	KOG0253	Synaptic vesicle transporter SV2 (major facilitator superfamily)	R	General function prediction only ;
unigene_c2434	KOG0111	Cyclophilin-type peptidyl-prolyl cis-trans isomerase	O	Posttranslational modification, protein turnover, chaperones ;
unigene_c2435	KOG1946	RNA polymerase I transcription factor UAF	K	Transcription ;
unigene_c2436	KOG3677	RNA polymerase I-associated factor - PAF67	JK	Translation, ribosomal structure and biogenesis ; Transcription ;
unigene_c2438	KOG0055	Multidrug/pheromone exporter, ABC superfamily	Q	Secondary metabolites biosynthesis, transport and catabolism ;
unigene_c2440	KOG2951	Inositol monophosphatase	G	Carbohydrate transport and metabolism ;
unigene_c2441	KOG0627	Heat shock transcription factor	K	Transcription ;
unigene_c2442	KOG0731	AAA+-type ATPase containing the peptidase M41 domain	O	Posttranslational modification, protein turnover, chaperones ;
unigene_c2443	KOG2369	Lecithin:cholesterol acyltransferase (LCAT)/Acyl-ceramide synthase	I	Lipid transport and metabolism ;
unigene_c2444	KOG1601	GATA-4/5/6 transcription factors	K	Transcription ;
unigene_c2445	KOG0907	Thioredoxin	O	Posttranslational modification, protein turnover, chaperones ;
unigene_c2446	KOG2408	Peroxidase/oxygenase	R	General function prediction only ;
unigene_c2447	KOG2067	Mitochondrial processing peptidase, alpha subunit	O	Posttranslational modification, protein turnover, chaperones ;
unigene_c2448	KOG1439	RAB proteins geranylgeranyltransferase component A (RAB escort protein)	O	Posttranslational modification, protein turnover, chaperones ;
unigene_c2449	KOG2357	Uncharacterized conserved protein	S	Function unknown ;
unigene_c2450	KOG0745	Putative ATP-dependent Clp-type protease (AAA+ ATPase superfamily)	O	Posttranslational modification, protein turnover, chaperones ;
unigene_c2452	KOG0619	FOG: Leucine rich repeat	R	General function prediction only ;
unigene_c2453	KOG1355	Adenylosuccinate synthase	F	Nucleotide transport and metabolism ;
unigene_c2454	KOG0714	Molecular chaperone (DnaJ superfamily)	O	Posttranslational modification, protein turnover, chaperones ;
unigene_c2455	KOG0800	FOG: Predicted E3 ubiquitin ligase	O	Posttranslational modification, protein turnover, chaperones ;
unigene_c2456	KOG1187	Serine/threonine protein kinase	T	Signal transduction mechanisms ;
unigene_c2457	KOG0239	Kinesin (KAR3 subfamily)	Z	Cytoskeleton ;
unigene_c2458	KOG2292	Oligosaccharyltransferase, STT3 subunit	O	Posttranslational modification, protein turnover, chaperones ;
unigene_c2460	KOG0752	Mitochondrial solute carrier protein	C	Energy production and conversion ;
unigene_c2461	KOG0731	AAA+-type ATPase containing the peptidase M41 domain	O	Posttranslational modification, protein turnover, chaperones ;
unigene_c2462	KOG0967	ATP-dependent DNA ligase I	L	Replication, recombination and repair ;
unigene_c2463	KOG1971	Lysyl hydroxylase	O	Posttranslational modification, protein turnover, chaperones ;
unigene_c2464	KOG0384	Chromodomain-helicase DNA-binding protein	K	Transcription ;
unigene_c2465	KOG1444	Nucleotide-sugar transporter VRG4/SQV-7	GOU	Carbohydrate transport and metabolism ; Posttranslational modification, protein turnover, chaperones ; Intracellular trafficking, secretion, and vesicular transport ;
unigene_c2466	KOG2613	NMD protein affecting ribosome stability and mRNA decay	J	Translation, ribosomal structure and biogenesis ;
unigene_c2467	KOG0257	Kynurenine aminotransferase, glutamine transaminase K	E	Amino acid transport and metabolism ;
unigene_c2468	KOG0504	FOG: Ankyrin repeat	R	General function prediction only ;
unigene_c2469	KOG1014	17 beta-hydroxysteroid dehydrogenase type 3, HSD17B3	I	Lipid transport and metabolism ;
unigene_c2471	KOG1278	Endosomal membrane proteins, EMP70	U	Intracellular trafficking, secretion, and vesicular transport ;
unigene_c2472	KOG0223	Aquaporin (major intrinsic protein family)	G	Carbohydrate transport and metabolism ;
unigene_c2473	KOG2500	Uncharacterized conserved protein	S	Function unknown ;
unigene_c2475	KOG2134	Polynucleotide kinase 3' phosphatase	L	Replication, recombination and repair ;
unigene_c2476	KOG1336	Monodehydroascorbate/ferredoxin reductase	R	General function prediction only ;
unigene_c2477	KOG1186	Copper amine oxidase	Q	Secondary metabolites biosynthesis, transport and catabolism ;
unigene_c2479	KOG2397	Protein kinase C substrate, 80 KD protein, heavy chain	T	Signal transduction mechanisms ;
unigene_c2480	KOG4341	F-box protein containing LRR	R	General function prediction only ;
unigene_c2481	KOG3002	Zn finger protein	R	General function prediction only ;
unigene_c2485	KOG2860	Uncharacterized conserved protein, contains TraB domain	T	Signal transduction mechanisms ;
unigene_c2486	KOG0256	1-aminocyclopropane-1-carboxylate synthase, and related proteins	T	Signal transduction mechanisms ;
unigene_c2487	KOG0014	MADS box transcription factor	K	Transcription ;
unigene_c2488	KOG2778	Ubiquitin C-terminal hydrolase	O	Posttranslational modification, protein turnover, chaperones ;
unigene_c2490	KOG0441	Cu2+/Zn2+ superoxide dismutase SOD1	P	Inorganic ion transport and metabolism ;
unigene_c2491	KOG2201	Pantothenate kinase PanK and related proteins	H	Coenzyme transport and metabolism ;
unigene_c2492	KOG2650	Zinc carboxypeptidase	S	Function unknown ;
unigene_c2493	KOG1598	Transcription initiation factor TFIIIB, Brf1 subunit	K	Transcription ;
unigene_c2494	KOG0154	RNA-binding protein RBM5 and related proteins, contain G-patch and RRM domains	R	General function prediction only ;
unigene_c2495	KOG0117	Heterogeneous nuclear ribonucleoprotein R (RRM superfamily)	A	RNA processing and modification ;
unigene_c2497	KOG2584	Dihydroorotase and related enzymes	F	Nucleotide transport and metabolism ;
unigene_c2500	KOG0519	Sensory transduction histidine kinase	T	Signal transduction mechanisms ;
unigene_c2502	KOG3265	Histone chaperone involved in gene silencing	KB	Transcription ; Chromatin structure and dynamics ;
unigene_c2503	KOG1729	FYVE finger containing protein	R	General function prediction only ;
unigene_c2504	KOG1492	C3H1-type Zn-finger protein	R	General function prediction only ;
unigene_c2505	KOG0190	Protein disulfide isomerase (prolyl 4-hydroxylase beta subunit)	O	Posttranslational modification, protein turnover, chaperones ;
unigene_c2506	KOG0443	Actin regulatory proteins (gelsolin/villin family)	Z	Cytoskeleton ;
unigene_c2507	KOG0266	WD40 repeat-containing protein	R	General function prediction only ;
unigene_c2509	KOG2407	GPI transamidase complex, GPI16/PIG-T component, involved in glycosylphosphatidylinositol anchor biosynthesis	MO	Cell wall/membrane/envelope biogenesis ; Posttranslational modification, protein turnover, chaperones ;
unigene_c2510	KOG0150	Spliceosomal protein FBP21	A	RNA processing and modification ;
unigene_c2511	KOG0504	FOG: Ankyrin repeat	R	General function prediction only ;
unigene_c2512	KOG3140	Predicted membrane protein	S	Function unknown ;
unigene_c2513	KOG2099	Glycogen phosphorylase	G	Carbohydrate transport and metabolism ;
unigene_c2515	KOG2502	Tub family proteins	R	General function prediction only ;
unigene_c2516	KOG4197	FOG: PPR repeat	R	General function prediction only ;
unigene_c2518	KOG1981	SOK1 kinase belonging to the STE20/SPS1/GC kinase family	T	Signal transduction mechanisms ;
unigene_c2519	KOG0802	E3 ubiquitin ligase	O	Posttranslational modification, protein turnover, chaperones ;
unigene_c2520	KOG1041	Translation initiation factor 2C (eIF-2C) and related proteins	J	Translation, ribosomal structure and biogenesis ;
unigene_c2522	KOG4197	FOG: PPR repeat	R	General function prediction only ;
unigene_c2524	KOG0637	Sucrose transporter and related proteins	G	Carbohydrate transport and metabolism ;
unigene_c2525	KOG0048	Transcription factor, Myb superfamily	K	Transcription ;
unigene_c2527	KOG0995	Centromere-associated protein HEC1	D	Cell cycle control, cell division, chromosome partitioning ;
unigene_c2528	KOG0583	Serine/threonine protein kinase	T	Signal transduction mechanisms ;
unigene_c2529	KOG2854	Possible pfkB family carbohydrate kinase	G	Carbohydrate transport and metabolism ;
unigene_c2530	KOG0054	Multidrug resistance-associated protein/mitoxantrone resistance protein, ABC superfamily	Q	Secondary metabolites biosynthesis, transport and catabolism ;
unigene_c2531	KOG1737	Oxysterol-binding protein	I	Lipid transport and metabolism ;
unigene_c2532	KOG0698	Serine/threonine protein phosphatase	T	Signal transduction mechanisms ;
unigene_c2533	KOG1187	Serine/threonine protein kinase	T	Signal transduction mechanisms ;
unigene_c2534	KOG0543	FKBP-type peptidyl-prolyl cis-trans isomerase	O	Posttranslational modification, protein turnover, chaperones ;
unigene_c2535	KOG1250	Threonine/serine dehydratases	E	Amino acid transport and metabolism ;
unigene_c2540	KOG2788	Glycosyltransferase	G	Carbohydrate transport and metabolism ;
unigene_c2541	KOG1589	Uncharacterized conserved protein	S	Function unknown ;
unigene_c2542	KOG0787	Dehydrogenase kinase	T	Signal transduction mechanisms ;
unigene_c2544	KOG0032	Ca2+/calmodulin-dependent protein kinase, EF-Hand protein superfamily	T	Signal transduction mechanisms ;
unigene_c2545	KOG0619	FOG: Leucine rich repeat	R	General function prediction only ;
unigene_c2546	KOG1072	FOG: Kelch repeat	R	General function prediction only ;
unigene_c2548	KOG2654	Uncharacterized conserved protein	S	Function unknown ;
unigene_c2549	KOG1441	Glucose-6-phosphate/phosphate and phosphoenolpyruvate/phosphate antiporter	GE	Carbohydrate transport and metabolism ; Amino acid transport and metabolism ;
unigene_c2550	KOG1298	Squalene monooxygenase	I	Lipid transport and metabolism ;
unigene_c2552	KOG0050	mRNA splicing protein CDC5 (Myb superfamily)	AD	RNA processing and modification ; Cell cycle control, cell division, chromosome partitioning ;
unigene_c2553	KOG3140	Predicted membrane protein	S	Function unknown ;
unigene_c2555	KOG2062	26S proteasome regulatory complex, subunit RPN2/PSMD1	O	Posttranslational modification, protein turnover, chaperones ;
unigene_c2557	KOG0198	MEKK and related serine/threonine protein kinases	T	Signal transduction mechanisms ;
unigene_c2560	KOG1092	Ypt/Rab-specific GTPase-activating protein GYP1	U	Intracellular trafficking, secretion, and vesicular transport ;
unigene_c2564	KOG1520	Predicted alkaloid synthase/Surface mucin Hemomucin	R	General function prediction only ;
unigene_c2566	KOG2099	Glycogen phosphorylase	G	Carbohydrate transport and metabolism ;
unigene_c2567	KOG1502	Flavonol reductase/cinnamoyl-CoA reductase	V	Defense mechanisms ;
unigene_c2568	KOG1105	Transcription elongation factor TFIIS/Cofactor of enhancer-binding protein Sp1	K	Transcription ;
unigene_c2569	KOG0739	AAA+-type ATPase	O	Posttranslational modification, protein turnover, chaperones ;
unigene_c2570	KOG0333	U5 snRNP-like RNA helicase subunit	A	RNA processing and modification ;
unigene_c2571	KOG4197	FOG: PPR repeat	R	General function prediction only ;
unigene_c2572	KOG0308	Conserved WD40 repeat-containing protein	S	Function unknown ;
unigene_c2574	KOG1342	Histone deacetylase complex, catalytic component RPD3	B	Chromatin structure and dynamics ;
unigene_c2578	KOG1947	Leucine rich repeat proteins, some proteins contain F-box	R	General function prediction only ;
unigene_c2579	KOG0161	Myosin class II heavy chain	Z	Cytoskeleton ;
unigene_c2580	KOG1187	Serine/threonine protein kinase	T	Signal transduction mechanisms ;
unigene_c2581	KOG1062	Vesicle coat complex AP-1, gamma subunit	U	Intracellular trafficking, secretion, and vesicular transport ;
unigene_c2583	KOG2058	Ypt/Rab GTPase activating protein	U	Intracellular trafficking, secretion, and vesicular transport ;
unigene_c2584	KOG1203	Predicted dehydrogenase	G	Carbohydrate transport and metabolism ;
unigene_c2585	KOG0188	Alanyl-tRNA synthetase	J	Translation, ribosomal structure and biogenesis ;
unigene_c2587	KOG4711	Predicted membrane protein	R	General function prediction only ;
unigene_c2588	KOG2980	Integral membrane protease of the rhomboid family involved in different forms of regulated intramembrane proteolysis	T	Signal transduction mechanisms ;
unigene_c2589	KOG2660	Locus-specific chromosome binding proteins	S	Function unknown ;
unigene_c2591	KOG0725	Reductases with broad range of substrate specificities	R	General function prediction only ;
unigene_c2593	KOG2993	Cytoplasm to vacuole targeting protein	U	Intracellular trafficking, secretion, and vesicular transport ;
unigene_c2594	KOG0612	Rho-associated, coiled-coil containing protein kinase	T	Signal transduction mechanisms ;
unigene_c2595	KOG0529	Protein geranylgeranyltransferase type II, alpha subunit	O	Posttranslational modification, protein turnover, chaperones ;
unigene_c2598	KOG2671	Putative RNA methylase	L	Replication, recombination and repair ;
unigene_c2599	KOG0167	FOG: Armadillo/beta-catenin-like repeats	S	Function unknown ;
unigene_c2600	KOG2292	Oligosaccharyltransferase, STT3 subunit	O	Posttranslational modification, protein turnover, chaperones ;
unigene_c2601	KOG0048	Transcription factor, Myb superfamily	K	Transcription ;
unigene_c2602	KOG1479	Nucleoside transporter	F	Nucleotide transport and metabolism ;
unigene_c2603	KOG1365	RNA-binding protein Fusilli, contains RRM domain	AR	RNA processing and modification ; General function prediction only ;
unigene_c2604	KOG0731	AAA+-type ATPase containing the peptidase M41 domain	O	Posttranslational modification, protein turnover, chaperones ;
unigene_c2605	KOG0650	WD40 repeat nucleolar protein Bop1, involved in ribosome biogenesis	J	Translation, ribosomal structure and biogenesis ;
unigene_c2606	KOG2803	Choline phosphate cytidylyltransferase/Predicted CDP-ethanolamine synthase	I	Lipid transport and metabolism ;
unigene_c2607	KOG1187	Serine/threonine protein kinase	T	Signal transduction mechanisms ;
unigene_c2608	KOG4248	Ubiquitin-like protein, regulator of apoptosis	O	Posttranslational modification, protein turnover, chaperones ;
unigene_c2609	KOG0167	FOG: Armadillo/beta-catenin-like repeats	S	Function unknown ;
unigene_c2610	KOG1107	Membrane coat complex Retromer, subunit VPS35	U	Intracellular trafficking, secretion, and vesicular transport ;
unigene_c2612	KOG2757	Mannose-6-phosphate isomerase	G	Carbohydrate transport and metabolism ;
unigene_c2613	KOG2845	Activating signal cointegrator 1	K	Transcription ;
unigene_c2614	KOG1315	Predicted DHHC-type Zn-finger protein	R	General function prediction only ;
unigene_c2615	KOG2652	RNA polymerase II transcription initiation factor TFIIA, large chain	K	Transcription ;
unigene_c2616	KOG1677	CCCH-type Zn-finger protein	R	General function prediction only ;
unigene_c2617	KOG1187	Serine/threonine protein kinase	T	Signal transduction mechanisms ;
unigene_c2621	KOG4159	Predicted E3 ubiquitin ligase	O	Posttranslational modification, protein turnover, chaperones ;
unigene_c2622	KOG0954	PHD finger protein	R	General function prediction only ;
unigene_c2623	KOG0023	Alcohol dehydrogenase, class V	Q	Secondary metabolites biosynthesis, transport and catabolism ;
unigene_c2624	KOG0698	Serine/threonine protein phosphatase	T	Signal transduction mechanisms ;
unigene_c2625	KOG1944	Peroxisomal membrane protein MPV17 and related proteins	R	General function prediction only ;
unigene_c2626	KOG0819	Annexin	U	Intracellular trafficking, secretion, and vesicular transport ;
unigene_c2627	KOG1947	Leucine rich repeat proteins, some proteins contain F-box	R	General function prediction only ;
unigene_c2628	KOG0032	Ca2+/calmodulin-dependent protein kinase, EF-Hand protein superfamily	T	Signal transduction mechanisms ;
unigene_c2629	KOG4197	FOG: PPR repeat	R	General function prediction only ;
unigene_c2630	KOG1187	Serine/threonine protein kinase	T	Signal transduction mechanisms ;
unigene_c2631	KOG0959	N-arginine dibasic convertase NRD1 and related Zn2+-dependent endopeptidases, insulinase superfamily	O	Posttranslational modification, protein turnover, chaperones ;
unigene_c2633	KOG1367	3-phosphoglycerate kinase	G	Carbohydrate transport and metabolism ;
unigene_c2636	KOG1187	Serine/threonine protein kinase	T	Signal transduction mechanisms ;
unigene_c2638	KOG0013	Uncharacterized conserved protein	S	Function unknown ;
unigene_c2640	KOG1187	Serine/threonine protein kinase	T	Signal transduction mechanisms ;
unigene_c2642	KOG1122	tRNA and rRNA cytosine-C5-methylase (nucleolar protein NOL1/NOP2)	A	RNA processing and modification ;
unigene_c2643	KOG1947	Leucine rich repeat proteins, some proteins contain F-box	R	General function prediction only ;
unigene_c2646	KOG0704	ADP-ribosylation factor GTPase activator	TUZ	Signal transduction mechanisms ; Intracellular trafficking, secretion, and vesicular transport ; Cytoskeleton ;
unigene_c2648	KOG1303	Amino acid transporters	E	Amino acid transport and metabolism ;
unigene_c2649	KOG1426	FOG: RCC1 domain	S	Function unknown ;
unigene_c2650	KOG2592	Tumor differentially expressed (TDE) protein	S	Function unknown ;
unigene_c2651	KOG3149	Transcription initiation factor IIF, auxiliary subunit	K	Transcription ;
unigene_c2657	KOG4765	Uncharacterized conserved protein	S	Function unknown ;
unigene_c2658	KOG0619	FOG: Leucine rich repeat	R	General function prediction only ;
unigene_c2660	KOG0156	Cytochrome P450 CYP2 subfamily	Q	Secondary metabolites biosynthesis, transport and catabolism ;
unigene_c2661	KOG2347	Sec5 subunit of exocyst complex	U	Intracellular trafficking, secretion, and vesicular transport ;
unigene_c2664	KOG1441	Glucose-6-phosphate/phosphate and phosphoenolpyruvate/phosphate antiporter	GE	Carbohydrate transport and metabolism ; Amino acid transport and metabolism ;
unigene_c2665	KOG1197	Predicted quinone oxidoreductase	CR	Energy production and conversion ; General function prediction only ;
unigene_c2666	KOG2989	Uncharacterized conserved protein	S	Function unknown ;
unigene_c2667	KOG4675	Uncharacterized conserved protein, contains ENT domain	R	General function prediction only ;
unigene_c2668	KOG1856	Transcription elongation factor SPT6	A	RNA processing and modification ;
unigene_c2669	KOG0331	ATP-dependent RNA helicase	A	RNA processing and modification ;
unigene_c2670	KOG0294	WD40 repeat-containing protein	S	Function unknown ;
unigene_c2673	KOG1176	Acyl-CoA synthetase	I	Lipid transport and metabolism ;
unigene_c2675	KOG1246	DNA-binding protein jumonji/RBP2/SMCY, contains JmjC domain	R	General function prediction only ;
unigene_c2676	KOG2288	Galactosyltransferases	G	Carbohydrate transport and metabolism ;
unigene_c2678	KOG1721	FOG: Zn-finger	R	General function prediction only ;
unigene_c2679	KOG1525	Sister chromatid cohesion complex Cohesin, subunit PDS5	D	Cell cycle control, cell division, chromosome partitioning ;
unigene_c2680	KOG0117	Heterogeneous nuclear ribonucleoprotein R (RRM superfamily)	A	RNA processing and modification ;
unigene_c2682	KOG0698	Serine/threonine protein phosphatase	T	Signal transduction mechanisms ;
unigene_c2683	KOG2464	Serine/threonine kinase (haspin family)	D	Cell cycle control, cell division, chromosome partitioning ;
unigene_c2684	KOG1724	SCF ubiquitin ligase, Skp1 component	O	Posttranslational modification, protein turnover, chaperones ;
unigene_c2685	KOG2068	MOT2 transcription factor	K	Transcription ;
unigene_c2686	KOG1337	N-methyltransferase	R	General function prediction only ;
unigene_c2687	KOG1595	CCCH-type Zn-finger protein	R	General function prediction only ;
unigene_c2690	KOG1176	Acyl-CoA synthetase	I	Lipid transport and metabolism ;
unigene_c2691	KOG1523	Actin-related protein Arp2/3 complex, subunit ARPC1/p41-ARC	Z	Cytoskeleton ;
unigene_c2692	KOG1731	FAD-dependent sulfhydryl oxidase/quiescin and related proteins	D	Cell cycle control, cell division, chromosome partitioning ;
unigene_c2693	KOG1677	CCCH-type Zn-finger protein	R	General function prediction only ;
unigene_c2694	KOG2340	Uncharacterized conserved protein	S	Function unknown ;
unigene_c2695	KOG2606	OTU (ovarian tumor)-like cysteine protease	TO	Signal transduction mechanisms ; Posttranslational modification, protein turnover, chaperones ;
unigene_c2696	KOG1015	Transcription regulator XNP/ATRX, DEAD-box superfamily	K	Transcription ;
unigene_c2697	KOG4561	Uncharacterized conserved protein, contains TBC domain	TR	Signal transduction mechanisms ; General function prediction only ;
unigene_c2698	KOG1991	Nuclear transport receptor RANBP7/RANBP8 (importin beta superfamily)	YU	Nuclear structure ; Intracellular trafficking, secretion, and vesicular transport ;
unigene_c2699	KOG0359	Chaperonin complex component, TCP-1 zeta subunit (CCT6)	O	Posttranslational modification, protein turnover, chaperones ;
unigene_c2702	KOG2012	Ubiquitin activating enzyme UBA1	O	Posttranslational modification, protein turnover, chaperones ;
unigene_c2706	KOG1301	Vesicle trafficking protein Sly1 (Sec1 family)	U	Intracellular trafficking, secretion, and vesicular transport ;
unigene_c2710	KOG1725	Protein involved in membrane traffic (YOP1/TB2/DP1/HVA22 family)	U	Intracellular trafficking, secretion, and vesicular transport ;
unigene_c2711	KOG1021	Acetylglucosaminyltransferase EXT1/exostosin 1	GMW	Carbohydrate transport and metabolism ; Cell wall/membrane/envelope biogenesis ; Extracellular structures ;
unigene_c2712	KOG0700	Protein phosphatase 2C/pyruvate dehydrogenase (lipoamide) phosphatase	T	Signal transduction mechanisms ;
unigene_c2713	KOG0661	MAPK related serine/threonine protein kinase	T	Signal transduction mechanisms ;
unigene_c2714	KOG0207	Cation transport ATPase	P	Inorganic ion transport and metabolism ;
unigene_c2718	KOG1192	UDP-glucuronosyl and UDP-glucosyl transferase	GC	Carbohydrate transport and metabolism ; Energy production and conversion ;
unigene_c2719	KOG0712	Molecular chaperone (DnaJ superfamily)	O	Posttranslational modification, protein turnover, chaperones ;
unigene_c2720	KOG2499	Beta-N-acetylhexosaminidase	G	Carbohydrate transport and metabolism ;
unigene_c2721	KOG0799	Branching enzyme	G	Carbohydrate transport and metabolism ;
unigene_c2723	KOG4181	Uncharacterized conserved protein	S	Function unknown ;
unigene_c2725	KOG0889	Histone acetyltransferase SAGA, TRRAP/TRA1 component, PI-3 kinase superfamily	TBLD	Signal transduction mechanisms ; Chromatin structure and dynamics ; Replication, recombination and repair ; Cell cycle control, cell division, chromosome partitioning ;
unigene_c2728	KOG0683	Glutamine synthetase	E	Amino acid transport and metabolism ;
unigene_c2729	KOG0120	Splicing factor U2AF, large subunit (RRM superfamily)	A	RNA processing and modification ;
unigene_c2733	KOG2759	Vacuolar H+-ATPase V1 sector, subunit H	C	Energy production and conversion ;
unigene_c2734	KOG0161	Myosin class II heavy chain	Z	Cytoskeleton ;
unigene_c2737	KOG1305	Amino acid transporter protein	E	Amino acid transport and metabolism ;
unigene_c2739	KOG0160	Myosin class V heavy chain	Z	Cytoskeleton ;
unigene_c2740	KOG1354	Serine/threonine protein phosphatase 2A, regulatory subunit	T	Signal transduction mechanisms ;
unigene_c2744	KOG0550	Molecular chaperone (DnaJ superfamily)	O	Posttranslational modification, protein turnover, chaperones ;
unigene_c2745	KOG0066	eIF2-interacting protein ABC50 (ABC superfamily)	J	Translation, ribosomal structure and biogenesis ;
unigene_c2746	KOG1575	Voltage-gated shaker-like K+ channel, subunit beta/KCNAB	C	Energy production and conversion ;
unigene_c2748	KOG2850	Predicted peptidoglycan-binding protein, contains LysM domain	R	General function prediction only ;
unigene_c2749	KOG0974	WD-repeat protein WDR6, WD repeat superfamily	R	General function prediction only ;
unigene_c2750	KOG3603	Predicted phospholipase D	R	General function prediction only ;
unigene_c2753	KOG2418	Microtubule-associated protein TAU	Z	Cytoskeleton ;
unigene_c2754	KOG2619	Fucosyltransferase	GE	Carbohydrate transport and metabolism ; Amino acid transport and metabolism ;
unigene_c2756	KOG2656	DNA methyltransferase 1-associated protein-1	BK	Chromatin structure and dynamics ; Transcription ;
unigene_c2757	KOG1856	Transcription elongation factor SPT6	A	RNA processing and modification ;
unigene_c2758	KOG1411	Aspartate aminotransferase/Glutamic oxaloacetic transaminase AAT1/GOT2	E	Amino acid transport and metabolism ;
unigene_c2759	KOG1878	Nuclear receptor coregulator SMRT/SMRTER, contains Myb-like domains	K	Transcription ;
unigene_c2760	KOG0242	Kinesin-like protein	Z	Cytoskeleton ;
[truncated: 15,792 more rows]

## Sheet: Table S3
Table S3 Downregulated enrichment pathways
#Pathway	Sample1 (4153)	Sample2 (15788)	Pvalue	Qvalue	Pathway ID	Genes	KOs
Plant-pathogen interaction	232	650	4.52e-08	1.26e-05	ko04626	unigene_c156;unigene_c225;unigene_c278;unigene_c500;unigene_c683;unigene_c693;unigene_c836;unigene_c854;unigene_c1021;unigene_c1073;unigene_c1315;unigene_c1316;unigene_c1347;unigene_c1522;unigene_c1629;unigene_c1840;unigene_c1922;unigene_c1964;unigene_c2220;unigene_c2307;unigene_c2308;unigene_c2423;unigene_c2547;unigene_c2628;unigene_c2630;unigene_c2801;unigene_c2858;unigene_c2939;unigene_c3103;u…	K13430+K13422+K13457+K13460+K13448+K13459+K13416+K13417+K13420+K05391+K13424+K13412+K13429+K13414+K13447+K00864+K13428+K12795+K13413+K13449+K02183+K13462+K13425+K13426+K13464+K13463+K04079
Phagosome	642	2069	1.41e-07	1.3e-05	ko04145	unigene_c655;unigene_c848;unigene_c2929;unigene_c3459;unigene_c3589;unigene_c5750;unigene_c5973;unigene_c6115;unigene_c6202;unigene_c6372;unigene_c6429;unigene_c6532;unigene_c6564;unigene_c6915;unigene_c6937;unigene_c7150;unigene_c7286;unigene_c7386;unigene_c7457;unigene_c7667;unigene_c7728;unigene_rep_c8052;unigene_c8146;unigene_c8288;unigene_c8289;unigene_c8351;unigene_c8431;unigene_c8469;unige…	K13882+K12478+K08488+K08008+K05692+K02154+K02150+K02155+K02153+K12182+K00921+K10956+K07375+K07887+K07889+K07897+K07374+K08057+K07888+K02146+K02147+K04392+K02145+K02152
Focal adhesion	607	1971	1.02e-06	3.66e-05	ko04510	unigene_c443;unigene_c1650;unigene_c1793;unigene_c3412;unigene_c3589;unigene_c3780;unigene_c4755;unigene_c5750;unigene_c5973;unigene_c6036;unigene_c6115;unigene_c6202;unigene_c6372;unigene_c6429;unigene_c6532;unigene_c6564;unigene_c6591;unigene_c6915;unigene_c6937;unigene_c7150;unigene_c7286;unigene_c7386;unigene_c7457;unigene_c7667;unigene_c7728;unigene_rep_c8052;unigene_c8146;unigene_c8288;unig…	K05760+K05740+K04437+K06276+K05692+K04725+K05732+K04371+K04456+K04514+K06252+K03083+K06269+K01110+K06236+K02677+K04392
Adherens junction	587	1923	5.39e-06	9.99e-05	ko04520	unigene_c1631;unigene_c3589;unigene_c5750;unigene_c5860;unigene_c5973;unigene_c6036;unigene_c6115;unigene_c6202;unigene_c6372;unigene_c6429;unigene_c6532;unigene_c6564;unigene_c6915;unigene_c6937;unigene_c7150;unigene_c7286;unigene_c7386;unigene_c7457;unigene_c7667;unigene_c7728;unigene_rep_c8052;unigene_c8146;unigene_c8288;unigene_c8289;unigene_c8351;unigene_c8431;unigene_c8469;unigene_c8494;uni…	K04498+K05692+K04371+K06084+K04392+K04427+K03115
Tight junction	609	2015	1.33e-05	0.000232	ko04530	unigene_c822;unigene_c848;unigene_c3169;unigene_c3589;unigene_c5750;unigene_c5973;unigene_c6115;unigene_c6202;unigene_c6372;unigene_c6429;unigene_c6433;unigene_c6532;unigene_c6564;unigene_c6591;unigene_c6915;unigene_c6937;unigene_c7150;unigene_c7286;unigene_c7386;unigene_c7457;unigene_c7515;unigene_c7667;unigene_c7728;unigene_rep_c8052;unigene_c8082;unigene_c8146;unigene_c8288;unigene_c8289;unige…	K04424+K10352+K05692+K04456+K06101+K06100+K04354+K03456+K06096+K04382+K01110+K02677+K03115
Monoterpenoid biosynthesis	13	20	0.000316021	0.00462	ko00902	unigene_c5845;unigene_c16873;unigene_rep_c34785;unigene_rep_c35984;unigene_rep_c36624;unigene_rep_c36820;unigene_rep_c36921;unigene_rep_c36950;unigene_rep_c37005;unigene_s49559;unigene_s49785;unigene_s50360;unigene_s50594	K07385+K12467
Apoptosis	47	117	0.000717014	0.00997	ko04210	unigene_c156;unigene_c1213;unigene_c1629;unigene_c2456;unigene_c2801;unigene_c3497;unigene_c3675;unigene_c3780;unigene_c4321;unigene_c4586;unigene_c6591;unigene_c7551;unigene_c8978;unigene_c10522;unigene_c11644;unigene_c13324;unigene_c13617;unigene_c13846;unigene_c16892;unigene_c17506;unigene_c18899;unigene_c19550;unigene_c19736;unigene_rep_c20878;unigene_rep_c22821;unigene_rep_c23398;unigene_rep…	K04733+K04725+K04456+K06268+K08738+K02084
Biosynthesis of unsaturated fatty acids	74	210	0.0025018	0.0316	ko01040	unigene_c1610;unigene_c2469;unigene_c3568;unigene_c4488;unigene_c7532;unigene_c10986;unigene_c11139;unigene_c12309;unigene_c19684;unigene_rep_c21271;unigene_rep_c21353;unigene_rep_c22748;unigene_rep_c28461;unigene_rep_c30365;unigene_rep_c31052;unigene_rep_c31835;unigene_rep_c31892;unigene_rep_c32369;unigene_rep_c33022;unigene_rep_c33467;unigene_rep_c33936;unigene_rep_c34212;unigene_rep_c34942;uni…	K00232+K10251+K00059+K01076+K03921+K10258+K10255+K10257+K10256+K00507+K07513
Gap junction	45	120	0.00452067	0.0524	ko04540	unigene_c6036;unigene_c13342;unigene_c17286;unigene_c18638;unigene_rep_c20883;unigene_rep_c22451;unigene_rep_c22659;unigene_rep_c22753;unigene_rep_c22827;unigene_rep_c23017;unigene_rep_c23210;unigene_rep_c25135;unigene_rep_c26065;unigene_rep_c26518;unigene_rep_c26772;unigene_rep_c33179;unigene_rep_c33775;unigene_rep_c33974;unigene_rep_c34201;unigene_rep_c34295;unigene_rep_c34379;unigene_rep_c3478…	K04371+K07375+K07374+K02677+K02087+K08959
SNARE interactions in vesicular transport	36	96	0.0103228	0.115	ko04130	unigene_c720;unigene_c2929;unigene_c3344;unigene_c3485;unigene_c8281;unigene_c19714;unigene_c19931;unigene_c20613;unigene_rep_c20979;unigene_rep_c21150;unigene_rep_c21194;unigene_rep_c21361;unigene_rep_c21382;unigene_rep_c21719;unigene_rep_c22012;unigene_rep_c23586;unigene_rep_c24432;unigene_rep_c26177;unigene_c26726;unigene_rep_c26908;unigene_rep_c31853;unigene_rep_c31855;unigene_rep_c32399;unig…	K08493+K08488+K08486+K08515+K08495+K08509+K08508+K08490+K08503+K08506
Calcium signaling pathway	57	171	0.0240753	0.209	ko04020	unigene_c137;unigene_c623;unigene_c1536;unigene_c1543;unigene_c2411;unigene_c2460;unigene_c2794;unigene_c3740;unigene_c3845;unigene_c3878;unigene_c4677;unigene_c5220;unigene_c6539;unigene_c8153;unigene_c11639;unigene_c13507;unigene_c17437;unigene_c17924;unigene_c19735;unigene_rep_c20878;unigene_rep_c21874;unigene_rep_c22753;unigene_rep_c22827;unigene_rep_c26039;unigene_rep_c30417;unigene_rep_c316…	K05863+K05862+K05864+K05857+K05849+K05850+K02183+K06268+K02677+K04718
Toll-like receptor signaling pathway	40	118	0.0404368	0.331	ko04620	unigene_c156;unigene_c1213;unigene_c1629;unigene_c2456;unigene_c2801;unigene_c3497;unigene_c3675;unigene_c4321;unigene_c4586;unigene_c6036;unigene_c6591;unigene_c7551;unigene_c8978;unigene_c10522;unigene_c11644;unigene_c13324;unigene_c13342;unigene_c13617;unigene_c13846;unigene_c16892;unigene_c17286;unigene_c17506;unigene_c18638;unigene_c18899;unigene_c19550;unigene_c19736;unigene_rep_c22451;unig…	K04733+K04371+K04456+K04392+K04427
Glycerophospholipid metabolism	51	157	0.0490664	0.39	ko00564	unigene_c1603;unigene_c2606;unigene_c2964;unigene_c3177;unigene_c3345;unigene_c3582;unigene_c3965;unigene_c4007;unigene_c4737;unigene_c7381;unigene_c8674;unigene_c8993;unigene_c9085;unigene_c9117;unigene_c9773;unigene_c9781;unigene_c10964;unigene_c12241;unigene_c12525;unigene_c13180;unigene_c14149;unigene_c14318;unigene_c16912;unigene_c17108;unigene_c17591;unigene_c18557;unigene_c18969;unigene_c1…	K01115+K00967+K13510+K00901+K01613+K00866+K00894+K13508+K06130+K00006+K01048+K01126+K01047+K00630+K00981+K00995+K01080+K06129+K13513+K08730+K00968+K00057+K13523+K13535
Sphingolipid metabolism	29	83	0.0507527	0.392	ko00600	unigene_c3068;unigene_c4361;unigene_c6174;unigene_c9720;unigene_c10405;unigene_c17063;unigene_c17527;unigene_rep_c21083;unigene_rep_c21100;unigene_rep_c21471;unigene_rep_c21695;unigene_rep_c22737;unigene_rep_c23910;unigene_rep_c28387;unigene_rep_c30331;unigene_rep_c30429;unigene_rep_c31297;unigene_rep_c31984;unigene_rep_c33112;unigene_rep_c33376;unigene_rep_c33519;unigene_rep_c33882;unigene_rep_c…	K01190+K04711+K12349+K01080+K04714+K07407+K04717+K04716+K12309+K00654+K04718
Cell cycle	64	203	0.0544845	0.4	ko04110	unigene_c730;unigene_c785;unigene_c1442;unigene_c1631;unigene_c1901;unigene_c2574;unigene_c2684;unigene_c3104;unigene_c3160;unigene_c3785;unigene_c3868;unigene_c4048;unigene_c4804;unigene_c5097;unigene_c5226;unigene_c5314;unigene_c5466;unigene_c5860;unigene_c10918;unigene_c11184;unigene_c12896;unigene_c12927;unigene_c13536;unigene_c15496;unigene_c16731;unigene_c17609;unigene_c20021;unigene_rep_c2…	K03364+K05868+K04498+K04683+K06067+K03094+K06636+K02604+K04681+K06618+K03363+K02210+K02213+K06627+K06669+K03351+K02540+K02365+K03350+K02180+K03083+K06630+K02087+K02206+K03348
Proximal tubule bicarbonate reclamation	13	32	0.0547319	0.4	ko04964	unigene_c3597;unigene_c7443;unigene_c13173;unigene_rep_c21044;unigene_rep_c24386;unigene_rep_c26752;unigene_rep_c33078;unigene_rep_c34062;unigene_rep_c35410;unigene_rep_c36109;unigene_s46066;unigene_s49582;unigene_s51077	K13577+K13576+K00261+K00025
Fluorobenzoate degradation	3	4	0.0584186	0.416	ko00364	unigene_c13074;unigene_rep_c22762;unigene_s50901	K01860+K01856+K01061
Amino sugar and nucleotide sugar metabolism	64	205	0.0649843	0.452	ko00520	unigene_c237;unigene_c735;unigene_c887;unigene_c1474;unigene_c1539;unigene_c1773;unigene_c2044;unigene_c2612;unigene_c2892;unigene_c4076;unigene_c4582;unigene_c4710;unigene_c5206;unigene_c5468;unigene_c8236;unigene_c8546;unigene_c9035;unigene_c11243;unigene_c13358;unigene_c13642;unigene_c16932;unigene_c18316;unigene_c18410;unigene_rep_c21279;unigene_rep_c21301;unigene_rep_c21321;unigene_rep_c2173…	K00820+K13648+K01809+K00770+K08679+K00847+K00964+K00965+K00884+K01711+K01835+K00844+K00326+K00012+K01183+K01784+K12449+K12450+K12451+K01810+K00971+K00966+K00975+K00963+K01840+K01209+K10046
Oxidative phosphorylation	72	235	0.0757393	0.501	ko00190	unigene_c525;unigene_c2238;unigene_c3004;unigene_c4721;unigene_c5974;unigene_c6644;unigene_c7060;unigene_c8188;unigene_c8885;unigene_c9969;unigene_c10028;unigene_c10415;unigene_c10977;unigene_c13291;unigene_c13421;unigene_c17142;unigene_c17456;unigene_c17966;unigene_c18371;unigene_c18768;unigene_rep_c21994;unigene_rep_c22653;unigene_rep_c22705;unigene_rep_c22750;unigene_rep_c23652;unigene_rep_c23…	K03885+K01535+K01507+K03878+K00337+K02126+K02258+K02154+K02150+K03936+K02155+K02153+K03946+K02261+K02109+K03881+K00342+K03955+K02140+K02266+K00413+K00419+K00416+K03953+K00234+K02146+K02147+K03963+K00329+K00356+K11353+K00338+K03941+K02128+K02145+K02152+K02138+K02133
Lipopolysaccharide biosynthesis	4	7	0.0831836	0.526	ko00540	unigene_c9326;unigene_c12116;unigene_c13482;unigene_c17958	K02536+K00979+K00748+K02527
Endocytosis	85	284	0.0926212	0.572	ko04144	unigene_c848;unigene_c1063;unigene_c1369;unigene_c1561;unigene_c1603;unigene_c1753;unigene_c2088;unigene_c3531;unigene_c3830;unigene_c3965;unigene_c3974;unigene_c4210;unigene_c5840;unigene_c6089;unigene_c6982;unigene_c7450;unigene_c8579;unigene_c8718;unigene_c9389;unigene_c13626;unigene_c13903;unigene_c14009;unigene_c14071;unigene_c14149;unigene_c14214;unigene_c17033;unigene_c17504;unigene_c17516…	K12478+K12469+K12483+K10591+K12471+K01115+K12193+K11247+K12191+K12479+K12491+K12486+K12489+K01528+K07904+K11866+K12492+K03283+K12182+K12183+K12476+K04646+K00889+K09526+K07887+K07889+K07897+K12192+K11827+K12198+K13305+K12477+K08291+K07888+K12188+K12194+K12197
Vasopressin-regulated water reabsorption	10	25	0.0952138	0.575	ko04962	unigene_c5840;unigene_c6195;unigene_rep_c21597;unigene_rep_c22498;unigene_rep_c23171;unigene_rep_c31818;unigene_rep_c32582;unigene_rep_c32891;unigene_rep_c34006;unigene_rep_c34891	K07904+K12462+K07887+K07889+K10418+K07888
Glucosinolate biosynthesis	7	16	0.100114	0.592	ko00966	unigene_c1618;unigene_c10378;unigene_c12072;unigene_c16946;unigene_c16964;unigene_c19024;unigene_rep_c25860	K11820+K11821+K11812+K13027+K12153+K11813
Diterpenoid biosynthesis	21	62	0.114511	0.663	ko00904	unigene_c5845;unigene_c9522;unigene_c11362;unigene_c16785;unigene_c16873;unigene_c17011;unigene_rep_c20934;unigene_rep_c31539;unigene_rep_c33452;unigene_rep_c34237;unigene_rep_c35725;unigene_rep_c36633;unigene_rep_c36945;unigene_rep_c36956;unigene_rep_c37770;unigene_rep_c37833;unigene_rep_c37854;unigene_s46579;unigene_s48497;unigene_s50420;unigene_s50970	K12929+K04122+K04124+K05282+K04120+K04125+K13070
Pentose and glucuronate interconversions	48	156	0.11968	0.679	ko00040	unigene_c420;unigene_c647;unigene_c1051;unigene_c1199;unigene_c2012;unigene_c2499;unigene_c2727;unigene_c3679;unigene_c4183;unigene_c7979;unigene_c10156;unigene_c17248;unigene_c17510;unigene_c17687;unigene_c18024;unigene_rep_c21123;unigene_rep_c21301;unigene_rep_c21414;unigene_rep_c21621;unigene_rep_c21759;unigene_rep_c22198;unigene_rep_c22280;unigene_rep_c23558;unigene_rep_c23712;unigene_rep_c25…	K01051+K01213+K01184+K01728+K08094+K00012+K00128+K00963+K01805+K00875
MAPK signaling pathway	67	225	0.13285	0.739	ko04010	unigene_c822;unigene_c1109;unigene_c1793;unigene_c3169;unigene_c6036;unigene_c6591;unigene_c7152;unigene_c7515;unigene_c7975;unigene_c8633;unigene_c8712;unigene_c11606;unigene_c12970;unigene_c13180;unigene_c13342;unigene_c13626;unigene_c14318;unigene_c17114;unigene_c17286;unigene_c18638;unigene_c19308;unigene_rep_c20878;unigene_rep_c21081;unigene_rep_c21201;unigene_rep_c21565;unigene_rep_c21577;u…	K04424+K04426+K04421+K04428+K04437+K04371+K04456+K04460+K04461+K04419+K04457+K01047+K03283+K04423+K04422+K06268+K02677+K04392+K04427
D-Glutamine and D-glutamate metabolism	5	11	0.13659	0.745	ko00471	unigene_rep_c33078;unigene_rep_c36109;unigene_s46066;unigene_s49582;unigene_s51077	K00261
Arachidonic acid metabolism	26	81	0.144736	0.774	ko00590	unigene_c3025;unigene_c4812;unigene_c5228;unigene_c8019;unigene_c11251;unigene_c13180;unigene_c13912;unigene_c14318;unigene_c17320;unigene_c18507;unigene_c19156;unigene_c20743;unigene_rep_c23921;unigene_rep_c30229;unigene_rep_c33762;unigene_rep_c34528;unigene_rep_c34907;unigene_rep_c35843;unigene_rep_c35918;unigene_rep_c36452;unigene_rep_c37452;unigene_rep_c37461;unigene_rep_c37482;unigene_rep_c3…	K00079+K00081+K08726+K00490+K01047+K00681+K05309+K00432
Two-component system	17	51	0.162485	0.836	ko02020	unigene_c2728;unigene_c3712;unigene_c6961;unigene_c10137;unigene_c12309;unigene_c13447;unigene_c18184;unigene_c20839;unigene_rep_c28461;unigene_rep_c32197;unigene_rep_c33120;unigene_rep_c33819;unigene_s47879;unigene_s48484;unigene_s49545;unigene_s49607;unigene_s51132	K01915+K00990+K01077+K01113+K10255+K03413+K07678+K02488+K00626
RNA polymerase	21	65	0.167872	0.849	ko03020	unigene_c1621;unigene_c3345;unigene_c3462;unigene_c3738;unigene_c9828;unigene_c10018;unigene_c13677;unigene_c16793;unigene_c19910;unigene_rep_c21202;unigene_rep_c21682;unigene_rep_c22157;unigene_rep_c23266;unigene_c24264;unigene_rep_c26616;unigene_rep_c29894;unigene_rep_c32097;unigene_rep_c32901;unigene_rep_c34633;unigene_rep_c35416;unigene_rep_c35772	K03015+K03008+K03009+K03010+K02999+K03002+K03017+K03013+K03026+K03014+K03024+K03025+K03012
Peptidoglycan biosynthesis	2	3	0.171162	0.85	ko00550	unigene_c3128;unigene_c11135	K01921+K05366
Natural killer cell mediated cytotoxicity	24	77	0.198209	0.903	ko04650	unigene_c6036;unigene_c13342;unigene_c17286;unigene_c18638;unigene_rep_c20878;unigene_rep_c22451;unigene_rep_c22753;unigene_rep_c22827;unigene_rep_c26065;unigene_rep_c33179;unigene_rep_c33812;unigene_rep_c34286;unigene_rep_c36791;unigene_rep_c36892;unigene_rep_c36941;unigene_rep_c36993;unigene_rep_c37059;unigene_s47059;unigene_s48979;unigene_s50101;unigene_s50802;unigene_s50828;unigene_s51130;uni…	K04371+K06268+K02677+K04392
Other glycan degradation	16	50	0.221851	0.979	ko00511	unigene_c3068;unigene_c3183;unigene_c4138;unigene_c4361;unigene_c6174;unigene_c10405;unigene_c16740;unigene_c17527;unigene_c20218;unigene_rep_c21717;unigene_rep_c24791;unigene_rep_c30331;unigene_rep_c30429;unigene_rep_c33112;unigene_rep_c33376;unigene_rep_c33882	K01190+K12311+K01191+K01444+K01227+K12309
Plant hormone signal transduction	55	192	0.25274	1	ko04075	unigene_c106;unigene_c185;unigene_c278;unigene_c1021;unigene_c1964;unigene_c2533;unigene_c3149;unigene_c3552;unigene_c4181;unigene_c4516;unigene_c4709;unigene_c5039;unigene_c6340;unigene_c7508;unigene_c8710;unigene_c8965;unigene_c9208;unigene_c9516;unigene_c9958;unigene_c11267;unigene_c12807;unigene_c13104;unigene_c13587;unigene_c13937;unigene_c14088;unigene_c15200;unigene_c16766;unigene_c17386;u…	K13415+K13422+K13416+K13449+K13464+K13946+K13463
Arginine and proline metabolism	48	167	0.261398	1	ko00330	unigene_c1463;unigene_c1551;unigene_c2061;unigene_c2728;unigene_c2758;unigene_c2955;unigene_c7983;unigene_c9150;unigene_c10087;unigene_c12153;unigene_c14011;unigene_c19421;unigene_c19494;unigene_rep_c20940;unigene_rep_c21136;unigene_rep_c21621;unigene_rep_c23712;unigene_rep_c25252;unigene_rep_c30461;unigene_rep_c31513;unigene_rep_c32778;unigene_rep_c33078;unigene_rep_c33120;unigene_rep_c33483;uni…	K00933+K12657+K01583+K01915+K00813+K01585+K01427+K01428+K01426+K00797+K00934+K00318+K00128+K01611+K00261+K11142+K01259+K12256
D-Alanine metabolism	1	1	0.263048	1	ko00473	unigene_c3128	K01921
Starch and sucrose metabolism	110	396	0.267047	1	ko00500	unigene_c126;unigene_c274;unigene_c420;unigene_c647;unigene_c735;unigene_c1051;unigene_c1199;unigene_c1377;unigene_c1474;unigene_c1539;unigene_c1773;unigene_c2012;unigene_c2044;unigene_c2398;unigene_c2499;unigene_c2727;unigene_c2907;unigene_c4076;unigene_c4183;unigene_c4331;unigene_c4471;unigene_c4582;unigene_c5206;unigene_c5751;unigene_c6836;unigene_c6904;unigene_c6943;unigene_c7301;unigene_c797…	K05350+K01087+K01051+K01213+K01184+K13648+K01193+K00770+K08679+K01199+K01187+K01179+K00703+K00847+K00696+K00705+K05349+K01188+K01177+K00688+K01835+K00844+K01176+K00012+K01838+K00697+K01810+K00975+K00963
Benzoxazinoid biosynthesis	12	38	0.282863	1	ko00402	unigene_c6895;unigene_c9058;unigene_c13457;unigene_rep_c24098;unigene_rep_c31620;unigene_rep_c33408;unigene_rep_c34380;unigene_rep_c34871;unigene_rep_c35057;unigene_rep_c35258;unigene_s48925;unigene_s49387	K13228+K13227+K13230+K13229
Protein processing in endoplasmic reticulum	137	499	0.292309	1	ko04141	unigene_c117;unigene_c269;unigene_c904;unigene_c1109;unigene_c2379;unigene_c2479;unigene_c2684;unigene_c3605;unigene_c3617;unigene_c3686;unigene_c3784;unigene_c6255;unigene_c7882;unigene_c9367;unigene_c10262;unigene_c10828;unigene_c11321;unigene_c11439;unigene_c11606;unigene_c11669;unigene_c13102;unigene_c13626;unigene_c18013;unigene_c18962;unigene_c19308;unigene_c19639;unigene_c20268;unigene_c20…	K09561+K13525+K10661+K04426+K12669+K08288+K03094+K06689+K10666+K10601+K14006+K14016+K04523+K01228+K09485+K14007+K09556+K09054+K03283+K10956+K08860+K09523+K01230+K10575+K09530+K09503+K13993+K14009+K10088+K10636+K08057+K10085+K04079+K10084+K14002+K12667+K14011+K12666+K13719+K09580+K09584+K09518+K14026+K12668+K09490+K13249+K03237
Phenylalanine metabolism	31	107	0.297747	1	ko00360	unigene_c1554;unigene_c2758;unigene_c2806;unigene_c3259;unigene_c4938;unigene_c7641;unigene_c8405;unigene_c8635;unigene_c9678;unigene_c10087;unigene_c14011;unigene_c17611;unigene_rep_c21621;unigene_rep_c22511;unigene_rep_c22661;unigene_rep_c23014;unigene_rep_c23712;unigene_rep_c24582;unigene_rep_c30116;unigene_rep_c33514;unigene_c35212;unigene_rep_c36021;unigene_rep_c36975;unigene_rep_c36997;unig…	K10775+K00813+K00588+K05714+K00817+K09754+K00430+K01426+K00129+K07253+K01904+K00487
Aldosterone-regulated sodium reabsorption	13	42	0.298265	1	ko04960	unigene_c3412;unigene_c3568;unigene_c6036;unigene_c11680;unigene_c13342;unigene_c17286;unigene_c18638;unigene_rep_c22451;unigene_rep_c22753;unigene_rep_c22827;unigene_rep_c23079;unigene_rep_c26065;unigene_rep_c33179	K06276+K00071+K04371+K02677+K13305
Polyketide sugar unit biosynthesis	7	21	0.303964	1	ko00523	unigene_rep_c30672;unigene_rep_c34846;unigene_s35884;unigene_s47469;unigene_s48353;unigene_s49367;unigene_s49548	K12451+K01710
Terpenoid backbone biosynthesis	21	71	0.30562	1	ko00900	unigene_c295;unigene_c1944;unigene_c2137;unigene_c4678;unigene_c7987;unigene_c9202;unigene_c9709;unigene_c16873;unigene_c19629;unigene_rep_c23609;unigene_rep_c24104;unigene_c24997;unigene_rep_c32889;unigene_rep_c33894;unigene_rep_c34785;unigene_c35748;unigene_rep_c36820;unigene_s48484;unigene_s49785;unigene_s50360;unigene_s50795	K05356+K00938+K00021+K13789+K00787+K12742+K11778+K01662+K00991+K00626
Adipocytokine signaling pathway	21	71	0.30562	1	ko04920	unigene_c611;unigene_c694;unigene_c3808;unigene_c6591;unigene_c6848;unigene_c6912;unigene_c12784;unigene_c13959;unigene_c17453;unigene_c17738;unigene_c19703;unigene_rep_c21014;unigene_rep_c21389;unigene_rep_c21939;unigene_rep_c27734;unigene_rep_c30453;unigene_rep_c31873;unigene_rep_c31985;unigene_rep_c37582;unigene_rep_c37591;unigene_s46333	K07199+K01897+K04456+K07191+K07359+K07203+K07198
N-Glycan biosynthesis	20	68	0.321999	1	ko00510	unigene_c2379;unigene_c5136;unigene_c6481;unigene_c8359;unigene_c10828;unigene_c17119;unigene_c19895;unigene_c20831;unigene_rep_c22276;unigene_rep_c23324;unigene_rep_c24451;unigene_rep_c24898;unigene_c26160;unigene_rep_c30402;unigene_rep_c31976;unigene_rep_c33089;unigene_rep_c33374;unigene_rep_c35259;unigene_rep_c35540;unigene_s49728	K12669+K07252+K00736+K03850+K01228+K00737+K01230+K12667+K12666+K12668+K00902
Ether lipid metabolism	17	58	0.347801	1	ko00565	unigene_c1603;unigene_c2964;unigene_c3746;unigene_c3965;unigene_c9781;unigene_c12241;unigene_c12525;unigene_c13180;unigene_c14149;unigene_c14318;unigene_c18969;unigene_rep_c21083;unigene_rep_c21695;unigene_rep_c22920;unigene_rep_c25113;unigene_rep_c31984;unigene_s50204	K01115+K13510+K01062+K01047+K01080
Long-term depression	21	73	0.358012	1	ko04730	unigene_c6036;unigene_c13180;unigene_c13342;unigene_c14318;unigene_c17286;unigene_c17863;unigene_c18638;unigene_rep_c20987;unigene_rep_c22451;unigene_rep_c22753;unigene_rep_c22827;unigene_rep_c26065;unigene_rep_c31913;unigene_rep_c33179;unigene_rep_c34133;unigene_rep_c34901;unigene_rep_c35284;unigene_s47093;unigene_s47679;unigene_s50606;unigene_s51101	K04371+K01047+K03456+K04382+K02677
Ribosome	175	653	0.399771	1	ko03010	unigene_c4271;unigene_c4797;unigene_c4884;unigene_c5135;unigene_c5209;unigene_c6616;unigene_c7008;unigene_c7614;unigene_c7751;unigene_c7935;unigene_c8729;unigene_c9490;unigene_c9764;unigene_c10367;unigene_c10946;unigene_c11335;unigene_c12012;unigene_c12943;unigene_c14168;unigene_c18726;unigene_c19259;unigene_c19287;unigene_c20386;unigene_rep_c21120;unigene_rep_c21358;unigene_rep_c21851;unigene_re…	K02924+K02902+K02879+K02933+K02871+K02909+K02992+K02926+K02945+K02959+K02990+K02946+K02916+K02954+K02923+K02953+K02922+K02961+K02965+K02873+K02894+K02866+K02941+K02874+K02914+K02952+K02880+K02918+K02980+K02966+K02985+K02942+K02870+K02876+K02921+K02867+K02900+K02969+K02892+K02943+K02998+K02971+K02912+K02896+K02865+K02973+K02903+K02920+K02917+K02932+K02937+K02995+K02891+K02940+K02974+K02947+K02906+…
Olfactory transduction	11	38	0.41533	1	ko04740	unigene_c8153;unigene_c17437;unigene_c17924;unigene_rep_c26039;unigene_rep_c37606;unigene_rep_c37927;unigene_rep_c37932;unigene_s48201;unigene_s49457;unigene_s51010;unigene_s51059	K02183+K04257
Carbohydrate digestion and absorption	5	16	0.417122	1	ko04973	unigene_c6591;unigene_c6912;unigene_c13642;unigene_c18185;unigene_rep_c31931	K04456+K07593+K00844+K01176
Riboflavin metabolism	12	42	0.426446	1	ko00740	unigene_c3079;unigene_c3108;unigene_c4216;unigene_c4746;unigene_c6273;unigene_c10897;unigene_rep_c21048;unigene_rep_c21358;unigene_rep_c23317;unigene_rep_c33528;unigene_rep_c33979;unigene_rep_c35924	K11752+K01078+K00861+K01497+K02858
Glutathione metabolism	35	128	0.427623	1	ko00480	unigene_c2168;unigene_c4202;unigene_c12153;unigene_c13912;unigene_c18507;unigene_rep_c21369;unigene_rep_c23818;unigene_rep_c26205;unigene_rep_c26252;unigene_rep_c31843;unigene_rep_c32281;unigene_rep_c32682;unigene_rep_c33115;unigene_rep_c33197;unigene_rep_c33762;unigene_rep_c33968;unigene_rep_c34142;unigene_rep_c34154;unigene_rep_c34528;unigene_rep_c34907;unigene_rep_c35843;unigene_rep_c36452;uni…	K10807+K10808+K00797+K00681+K00432+K00799+K00033+K00031+K01255+K11142+K00434+K01256
Toluene degradation	3	9	0.435864	1	ko00623	unigene_c13074;unigene_rep_c22762;unigene_s50901	K01860+K01856+K01061
Tryptophan metabolism	26	95	0.445415	1	ko00380	unigene_c1618;unigene_c2660;unigene_c9497;unigene_c10087;unigene_c10378;unigene_c11385;unigene_c12072;unigene_c14011;unigene_c16946;unigene_c16964;unigene_c19024;unigene_rep_c21621;unigene_rep_c23700;unigene_rep_c23712;unigene_rep_c25860;unigene_rep_c31292;unigene_rep_c33117;unigene_rep_c34253;unigene_rep_c35855;unigene_rep_c35901;unigene_rep_c36158;unigene_s47148;unigene_s48484;unigene_s48928;un…	K11820+K11868+K01237+K01426+K11817+K11821+K11812+K11813+K00128+K11816+K01692+K03781+K00626
Fat digestion and absorption	7	24	0.450909	1	ko04975	unigene_c9629;unigene_c13180;unigene_c14318;unigene_rep_c21083;unigene_rep_c21695;unigene_rep_c31882;unigene_rep_c31984	K05684+K01047+K01080+K11160
Long-term potentiation	37	137	0.458141	1	ko04720	unigene_c1631;unigene_c5860;unigene_c6036;unigene_c8153;unigene_c13342;unigene_c17286;unigene_c17437;unigene_c17924;unigene_c18638;unigene_rep_c20878;unigene_rep_c21082;unigene_rep_c21233;unigene_rep_c22451;unigene_rep_c22753;unigene_rep_c22827;unigene_rep_c26039;unigene_rep_c26065;unigene_rep_c33179;unigene_rep_c33389;unigene_rep_c34286;unigene_rep_c36791;unigene_rep_c36892;unigene_rep_c36941;un…	K04498+K04371+K02183+K06268+K06269+K02677
Glycosphingolipid biosynthesis - globo series	4	13	0.459466	1	ko00603	unigene_c10834;unigene_rep_c21471;unigene_rep_c33519;unigene_s50284	K01988+K07407
Flavone and flavonol biosynthesis	12	43	0.463015	1	ko00944	unigene_c181;unigene_c16968;unigene_c17312;unigene_rep_c24967;unigene_rep_c25141;unigene_c25589;unigene_rep_c31620;unigene_rep_c33408;unigene_rep_c34380;unigene_rep_c35057;unigene_rep_c35482;unigene_s49387	K13083+K05280+K05279
Citrate cycle (TCA cycle)	30	111	0.467299	1	ko00020	unigene_rep_c25199;unigene_rep_c26325;unigene_rep_c32898;unigene_rep_c33950;unigene_rep_c33968;unigene_rep_c34062;unigene_rep_c34625;unigene_rep_c34706;unigene_rep_c35751;unigene_rep_c35904;unigene_rep_c36182;unigene_rep_c36333;unigene_s45925;unigene_s46693;unigene_s47294;unigene_s48435;unigene_s48810;unigene_s48861;unigene_s49052;unigene_s49072;unigene_s49709;unigene_s49900;unigene_s51064;unigen…	K00161+K01679+K00234+K00162+K00031+K00025+K01681+K01610+K01647+K01648+K00382+K00026
Fatty acid biosynthesis	19	70	0.482054	1	ko00061	unigene_c3568;unigene_c3645;unigene_c4587;unigene_c7532;unigene_c7749;unigene_c10075;unigene_c13149;unigene_c13244;unigene_c18699;unigene_rep_c21271;unigene_rep_c23335;unigene_rep_c26196;unigene_rep_c26325;unigene_rep_c31052;unigene_rep_c31892;unigene_rep_c32393;unigene_rep_c33962;unigene_rep_c37130;unigene_s51044	K00059+K10781+K02160+K03921+K09458+K11262+K02372+K00645+K10782
Cytosolic DNA-sensing pathway	10	36	0.483368	1	ko04623	unigene_c3462;unigene_c16793;unigene_c19910;unigene_rep_c21202;unigene_rep_c21682;unigene_rep_c22157;unigene_c24264;unigene_rep_c26616;unigene_rep_c29894;unigene_rep_c35416	K03009+K03013+K03026+K03014+K03024+K03025
Glycosaminoglycan biosynthesis - chondroitin sulfate	6	21	0.48872	1	ko00532	unigene_c994;unigene_c1578;unigene_c5428;unigene_c5448;unigene_c12927;unigene_c20179	K10158+K10812+K10157+K00734+K00771
Fc epsilon RI signaling pathway	13	48	0.506112	1	ko04664	unigene_c6036;unigene_c6591;unigene_c13180;unigene_c13342;unigene_c14318;unigene_c17286;unigene_c18638;unigene_rep_c22451;unigene_rep_c26065;unigene_rep_c33179;unigene_rep_c33812;unigene_s50828;unigene_s51130	K04371+K04456+K01047+K04392
Carotenoid biosynthesis	24	90	0.509159	1	ko00906	unigene_c511;unigene_c1166;unigene_c2645;unigene_c2652;unigene_c5691;unigene_c8019;unigene_c11385;unigene_c12648;unigene_c15336;unigene_c19156;unigene_c20310;unigene_rep_c20934;unigene_rep_c21584;unigene_rep_c26538;unigene_rep_c31539;unigene_rep_c32692;unigene_rep_c34237;unigene_rep_c36633;unigene_rep_c36945;unigene_rep_c36956;unigene_s45849;unigene_s46579;unigene_s50420;unigene_s50970	K00514+K09837+K09842+K09843+K09841+K02293
ErbB signaling pathway	22	83	0.525346	1	ko04012	unigene_c2088;unigene_c6036;unigene_c6591;unigene_c13342;unigene_c17286;unigene_c17453;unigene_c18638;unigene_rep_c20889;unigene_rep_c21939;unigene_rep_c22451;unigene_rep_c22753;unigene_rep_c22827;unigene_rep_c26065;unigene_rep_c31985;unigene_rep_c32923;unigene_rep_c33053;unigene_rep_c33179;unigene_rep_c34874;unigene_s35301;unigene_s46000;unigene_s46333;unigene_s50399	K07365+K04371+K04456+K07203+K03083+K02677+K04688
Base excision repair	17	64	0.529039	1	ko03410	unigene_c1355;unigene_c3952;unigene_c4334;unigene_c4383;unigene_c4622;unigene_c12967;unigene_c13366;unigene_c14211;unigene_c17280;unigene_c17534;unigene_c17811;unigene_c19292;unigene_c20588;unigene_rep_c21338;unigene_rep_c32756;unigene_rep_c33353;unigene_rep_c36925	K10801+K01142+K10802+K10563+K10747+K10773+K03512+K03504+K02327+K01246+K02328
Endocrine and other factor-regulated calcium reabsorption	11	41	0.529056	1	ko04961	unigene_c4210;unigene_c5840;unigene_c6089;unigene_c8579;unigene_c17033;unigene_rep_c22662;unigene_rep_c22753;unigene_rep_c22827;unigene_rep_c32891;unigene_s49499;unigene_s50586	K01528+K07904+K04646+K11827+K02677
Peroxisome	51	194	0.529709	1	ko04146	unigene_c1610;unigene_c2625;unigene_c3528;unigene_c3808;unigene_c4109;unigene_c4246;unigene_c4343;unigene_c4788;unigene_c4927;unigene_c5228;unigene_c8013;unigene_c8928;unigene_c9896;unigene_c10780;unigene_c11139;unigene_c11251;unigene_c11385;unigene_c17733;unigene_c17738;unigene_c20583;unigene_rep_c21014;unigene_rep_c22284;unigene_rep_c23921;unigene_rep_c27451;unigene_rep_c27734;unigene_rep_c3045…	K00232+K13347+K13348+K11147+K01897+K13354+K00306+K13345+K08726+K13356+K05677+K05678+K00106+K00477+K01640+K13342+K13343+K04565+K03781+K00031+K13341+K13237+K04564+K07513+K11517
TGF-beta signaling pathway	25	95	0.538307	1	ko04350	unigene_c1631;unigene_c1901;unigene_c2684;unigene_c4048;unigene_c5860;unigene_c6036;unigene_c13342;unigene_c17286;unigene_c17302;unigene_c17863;unigene_c18638;unigene_rep_c20987;unigene_rep_c21233;unigene_rep_c22451;unigene_rep_c26065;unigene_rep_c31913;unigene_rep_c33179;unigene_rep_c34133;unigene_rep_c34874;unigene_rep_c34901;unigene_rep_c35284;unigene_s47093;unigene_s47679;unigene_s50606;unige…	K04498+K04683+K03094+K04681+K04371+K04514+K03456+K04382+K04688
Glycerolipid metabolism	38	145	0.54261	1	ko00561	unigene_c1458;unigene_c1515;unigene_c1884;unigene_c3177;unigene_c3767;unigene_c4007;unigene_c4126;unigene_c5293;unigene_c5981;unigene_c7381;unigene_c9085;unigene_c9307;unigene_c9906;unigene_c10365;unigene_c10964;unigene_c16912;unigene_c17939;unigene_c18557;unigene_rep_c21083;unigene_rep_c21471;unigene_rep_c21621;unigene_rep_c21695;unigene_rep_c22601;unigene_rep_c23712;unigene_rep_c27282;unigene_r…	K01046+K01054+K00901+K03715+K13508+K00864+K09480+K00679+K00630+K01080+K07407+K00128+K13513+K11160+K13523
Folate biosynthesis	9	34	0.556501	1	ko00790	unigene_c5701;unigene_c6786;unigene_c6961;unigene_c10137;unigene_c14253;unigene_c19599;unigene_s47002;unigene_s47474;unigene_s48782	K13950+K01633+K01077+K01113+K13941+K00287
Ubiquinone and other terpenoid-quinone biosynthesis	10	38	0.561141	1	ko00130	unigene_c2637;unigene_c4902;unigene_c5464;unigene_c8168;unigene_c11530;unigene_c11846;unigene_rep_c30475;unigene_rep_c33118;unigene_s47231;unigene_s49914	K03183+K06127+K08680+K02548+K09834+K00591+K00568+K12502+K05928+K01904
One carbon pool by folate	10	38	0.561141	1	ko00670	unigene_c381;unigene_c4363;unigene_c13171;unigene_c18473;unigene_rep_c23115;unigene_rep_c25008;unigene_rep_c28031;unigene_s47002;unigene_s48782;unigene_s51514	K01934+K00601+K11175+K01491+K00287+K00600
NOD-like receptor signaling pathway	20	77	0.569797	1	ko04621	unigene_c3780;unigene_c5819;unigene_c6036;unigene_c13342;unigene_c17286;unigene_c18638;unigene_rep_c22451;unigene_rep_c23992;unigene_rep_c26065;unigene_rep_c30262;unigene_rep_c31910;unigene_rep_c33179;unigene_rep_c33384;unigene_rep_c33620;unigene_rep_c35065;unigene_rep_c35205;unigene_rep_c36594;unigene_s49515;unigene_s50340;unigene_s50788	K04725+K12795+K04371+K10165+K04079+K04427
Ribosome biogenesis in eukaryotes	15	58	0.580512	1	ko03008	unigene_c8212;unigene_c8287;unigene_c13867;unigene_c16783;unigene_c17461;unigene_rep_c22579;unigene_rep_c27860;unigene_rep_c33995;unigene_rep_c36092;unigene_rep_c37417;unigene_rep_c37507;unigene_rep_c37518;unigene_s49744;unigene_s49856;unigene_s50007	K12619+K03538+K11129+K03685+K07936+K07562+K03264+K03115
Taurine and hypotaurine metabolism	3	11	0.584525	1	ko00430	unigene_c9852;unigene_c13912;unigene_rep_c36078	K10712+K00681
Indole alkaloid biosynthesis	3	11	0.584525	1	ko00901	unigene_c19272;unigene_c19903;unigene_s49240	K01757+K08233
Tetracycline biosynthesis	2	7	0.587028	1	ko00253	unigene_c4587;unigene_c13244	K02160
Homologous recombination	18	70	0.590154	1	ko03440	unigene_c792;unigene_c1413;unigene_c2178;unigene_c3182;unigene_c5275;unigene_c5387;unigene_c9438;unigene_c10117;unigene_c11693;unigene_c17280;unigene_c17590;unigene_c17811;unigene_c19399;unigene_rep_c24687;unigene_rep_c27943;unigene_rep_c31982;unigene_rep_c33353;unigene_rep_c35543	K07466+K10875+K01159+K10739+K10871+K03655+K10901+K08775+K03504+K02327+K02328+K10877
RIG-I-like receptor signaling pathway	9	35	0.595696	1	ko04622	unigene_c1011;unigene_c2854;unigene_c5331;unigene_c16990;unigene_c17818;unigene_rep_c24960;unigene_rep_c29861;unigene_rep_c35205;unigene_rep_c35728	K12655+K11594+K09578+K04427
Steroid biosynthesis	12	47	0.60315	1	ko00100	unigene_c2817;unigene_c3746;unigene_c4780;unigene_c7101;unigene_c9307;unigene_c9784;unigene_c11211;unigene_c11633;unigene_c12205;unigene_c18259;unigene_rep_c23068;unigene_rep_c25157	K07748+K01852+K08246+K01853+K01052+K07750+K01824+K00227
Glycosylphosphatidylinositol(GPI)-anchor biosynthesis	24	95	0.629921	1	ko00563	unigene_c323;unigene_c3065;unigene_c8174;unigene_c10231;unigene_c10324;unigene_c10337;unigene_c10457;unigene_c12874;unigene_c17144;unigene_rep_c24485;unigene_rep_c26677;unigene_rep_c29952;unigene_rep_c31841;unigene_rep_c35097;unigene_s45690;unigene_s45749;unigene_s46354;unigene_s46450;unigene_s46565;unigene_s47081;unigene_s47150;unigene_s48738;unigene_s48949;unigene_s50347	K05290+K05294+K05288+K05287+K05285+K07542+K05291+K03861
Phenylpropanoid biosynthesis	67	262	0.630254	1	ko00940	unigene_c126;unigene_c1554;unigene_c2806;unigene_c6766;unigene_c6943;unigene_c7641;unigene_c8401;unigene_c8405;unigene_c8635;unigene_c9058;unigene_c9497;unigene_c9678;unigene_c12903;unigene_c16968;unigene_c17098;unigene_c17537;unigene_c17611;unigene_c19919;unigene_c20593;unigene_rep_c21678;unigene_rep_c22661;unigene_rep_c23014;unigene_rep_c24582;unigene_c25589;unigene_rep_c26426;unigene_rep_c2977…	K05350+K10775+K00588+K09755+K05349+K01188+K09754+K13067+K00430+K12356+K13066+K09753+K09756+K09757+K13065+K00083+K12355+K01904+K00487
Sulfur metabolism	8	32	0.632943	1	ko00920	unigene_c1612;unigene_c2205;unigene_c4239;unigene_c5933;unigene_c17345;unigene_rep_c30840;unigene_rep_c35890;unigene_rep_c36110	K00860+K00640+K01739+K01738
GnRH signaling pathway	26	103	0.633891	1	ko04912	unigene_c1109;unigene_c1603;unigene_c3965;unigene_c6036;unigene_c8153;unigene_c13180;unigene_c13342;unigene_c14149;unigene_c14318;unigene_c17286;unigene_c17437;unigene_c17924;unigene_c18638;unigene_c18969;unigene_rep_c21201;unigene_rep_c21577;unigene_rep_c22451;unigene_rep_c25113;unigene_rep_c26039;unigene_rep_c26065;unigene_rep_c33179;unigene_rep_c37606;unigene_rep_c37927;unigene_rep_c37932;unig…	K04421+K04428+K01115+K04371+K02183+K01047
Lipoic acid metabolism	2	8	0.664636	1	ko00785	unigene_c14354;unigene_rep_c33826	K03644
C5-Branched dibasic acid metabolism	2	8	0.664636	1	ko00660	unigene_c4508;unigene_c6113	K01653
Atrazine degradation	2	8	0.664636	1	ko00791	unigene_c7983;unigene_c16898	K01428+K01564
Various types of N-glycan biosynthesis	11	45	0.666751	1	ko00513	unigene_c2379;unigene_c6481;unigene_c20831;unigene_rep_c24451;unigene_c26160;unigene_rep_c30402;unigene_rep_c31976;unigene_rep_c33089;unigene_rep_c33374;unigene_rep_c35259;unigene_rep_c35540	K12669+K00736+K01230+K12667+K12666+K12668
Glycosaminoglycan biosynthesis - heparan sulfate	8	33	0.670419	1	ko00534	unigene_c994;unigene_c1578;unigene_c2711;unigene_c5079;unigene_c5428;unigene_c5448;unigene_c12927;unigene_c20179	K10158+K10157+K02366+K00734+K00771
DNA replication	14	58	0.693914	1	ko03030	unigene_c792;unigene_c3182;unigene_c5097;unigene_c8131;unigene_c8295;unigene_c12896;unigene_c12967;unigene_c17280;unigene_c17595;unigene_c17811;unigene_rep_c24814;unigene_rep_c31982;unigene_rep_c33353;unigene_rep_c36210	K07466+K10739+K02210+K03469+K02684+K02540+K10747+K03504+K02327+K02328+K10744
Basal transcription factors	22	90	0.694218	1	ko03022	unigene_c2615;unigene_c3520;unigene_c4973;unigene_c6442;unigene_c9832;unigene_c12819;unigene_c19079;unigene_c19574;unigene_rep_c21230;unigene_rep_c22202;unigene_rep_c24749;unigene_c25514;unigene_rep_c30451;unigene_rep_c32054;unigene_rep_c32411;unigene_rep_c32514;unigene_rep_c34985;unigene_rep_c36842;unigene_s46686;unigene_s49278;unigene_s50204;unigene_s50541	K03122+K03143+K03131+K03130+K03126+K03123+K03144+K03139+K03136+K03128+K03133+K03120+K03137+K03127
Glycosphingolipid biosynthesis - lacto and neolacto series	1	4	0.705084	1	ko00601	unigene_c5428	K07819
Biotin metabolism	3	13	0.705511	1	ko00780	unigene_c4756;unigene_c20229;unigene_rep_c28286	K01942+K00652+K01012
Non-homologous end-joining	3	13	0.705511	1	ko03450	unigene_c12510;unigene_c14211;unigene_c17534	K10887+K03512
Glyoxylate and dicarboxylate metabolism	13	55	0.721535	1	ko00630	unigene_c10346;unigene_rep_c22680;unigene_rep_c34062;unigene_rep_c34103;unigene_rep_c34625;unigene_rep_c35904;unigene_rep_c36182;unigene_s46717;unigene_s47294;unigene_s47742;unigene_s48484;unigene_s51064;unigene_s51372	K01601+K00042+K00025+K00122+K01681+K01647+K11517+K00626+K00026
Purine metabolism	72	289	0.72675	1	ko00230	unigene_c848;unigene_c1612;unigene_c1621;unigene_c2168;unigene_c3056;unigene_c3345;unigene_c3462;unigene_c3738;unigene_c3788;unigene_c3790;unigene_c4127;unigene_c4202;unigene_c4753;unigene_c5069;unigene_c6346;unigene_c7983;unigene_c8295;unigene_c9449;unigene_c9828;unigene_c10018;unigene_c11197;unigene_c11385;unigene_c11452;unigene_c12295;unigene_c13171;unigene_c13358;unigene_c13677;unigene_c13691…	K01553+K00860+K03015+K10807+K01510+K03008+K03009+K03010+K01509+K06928+K01490+K10808+K00088+K01427+K01428+K02684+K01511+K02999+K03002+K00106+K00962+K00939+K00601+K11175+K01835+K03017+K11808+K01952+K03013+K03504+K02327+K03026+K03014+K00759+K03024+K00948+K03025+K01768+K01488+K00873+K03012+K02328+K01939+K00942+K00985+K00940+K00856
Phototransduction	10	43	0.729202	1	ko04744	unigene_c5931;unigene_c8153;unigene_c17437;unigene_c17924;unigene_rep_c26039;unigene_rep_c37606;unigene_rep_c37927;unigene_rep_c37932;unigene_s51010;unigene_s51059	K04631+K02183
Butirosin and neomycin biosynthesis	2	9	0.73	1	ko00524	unigene_c13642;unigene_rep_c31931	K00844
Cyanoamino acid metabolism	29	120	0.735035	1	ko00460	unigene_c126;unigene_c1618;unigene_c5689;unigene_c6943;unigene_c7398;unigene_c8401;unigene_c9497;unigene_c10087;unigene_c10378;unigene_c13457;unigene_c13912;unigene_c14011;unigene_c16987;unigene_c17537;unigene_c19024;unigene_c19919;unigene_rep_c21678;unigene_rep_c24098;unigene_rep_c26426;unigene_rep_c29779;unigene_rep_c32088;unigene_rep_c32639;unigene_rep_c33529;unigene_rep_c34870;unigene_rep_c35…	K05350+K13030+K08249+K05349+K01188+K01426+K00681+K13027+K00600
Methane metabolism	30	124	0.735223	1	ko00680	unigene_c2408;unigene_c3098;unigene_c4491;unigene_c4492;unigene_c8597;unigene_c8635;unigene_c12531;unigene_c17510;unigene_c17814;unigene_rep_c23014;unigene_rep_c26132;unigene_rep_c30116;unigene_rep_c33117;unigene_rep_c33514;unigene_rep_c33799;unigene_rep_c33802;unigene_rep_c34103;unigene_rep_c34918;unigene_rep_c35195;unigene_rep_c36021;unigene_rep_c36975;unigene_rep_c37053;unigene_rep_c37060;unig…	K00850+K01834+K01079+K01895+K00430+K03390+K08094+K01007+K03781+K01689+K00058+K00122+K00600
Propanoate metabolism	23	96	0.735277	1	ko00640	unigene_c2925;unigene_c4587;unigene_c8597;unigene_c10075;unigene_c13244;unigene_c13397;unigene_c17814;unigene_c18699;unigene_c19642;unigene_rep_c21621;unigene_rep_c23712;unigene_rep_c31292;unigene_rep_c34128;unigene_rep_c34253;unigene_rep_c34349;unigene_rep_c35855;unigene_rep_c35901;unigene_rep_c36158;unigene_s48103;unigene_s48484;unigene_s49490;unigene_s50356;unigene_s51244	K00224+K02160+K01895+K11262+K05605+K00128+K01692+K00249+K00626
Nitrogen metabolism	19	80	0.737445	1	ko00910	unigene_c1274;unigene_c1554;unigene_c2728;unigene_c3577;unigene_c9617;unigene_c11836;unigene_c18526;unigene_rep_c33078;unigene_rep_c33120;unigene_rep_c33819;unigene_rep_c36109;unigene_rep_c36997;unigene_s46066;unigene_s47879;unigene_s49545;unigene_s49582;unigene_s49607;unigene_s51077;unigene_s51132	K00368+K10775+K01915+K01674+K00284+K00261
Histidine metabolism	19	80	0.737445	1	ko00340	unigene_c1463;unigene_c2806;unigene_c4938;unigene_c8405;unigene_c18142;unigene_rep_c21621;unigene_rep_c22706;unigene_rep_c23712;unigene_c25589;unigene_rep_c31620;unigene_rep_c33805;unigene_rep_c34253;unigene_rep_c34380;unigene_rep_c35057;unigene_rep_c35855;unigene_rep_c35901;unigene_rep_c36158;unigene_s49490;unigene_s50356	K00599+K00817+K00128+K00129+K00765+K01693
Metabolism of xenobiotics by cytochrome P450	23	97	0.754251	1	ko00980	unigene_c1689;unigene_c5228;unigene_c11139;unigene_c11251;unigene_c13635;unigene_rep_c21369;unigene_rep_c21621;unigene_rep_c23712;unigene_rep_c23818;unigene_rep_c23921;unigene_rep_c26205;unigene_rep_c26252;unigene_rep_c31843;unigene_rep_c32281;unigene_rep_c32682;unigene_rep_c33115;unigene_rep_c34154;unigene_rep_c35918;unigene_s49648;unigene_s49874;unigene_s49933;unigene_s50451;unigene_s51427	K00001+K01253+K07424+K00799+K00129
Ethylbenzene degradation	9	40	0.761962	1	ko00642	unigene_c1133;unigene_c2448;unigene_c3937;unigene_c5503;unigene_c10605;unigene_c18548;unigene_rep_c22089;unigene_rep_c33902;unigene_rep_c36240	K00680+K00632
Benzoate degradation	13	57	0.770552	1	ko00362	unigene_c1133;unigene_c2448;unigene_c3937;unigene_c5503;unigene_c10605;unigene_c13074;unigene_c18548;unigene_rep_c22089;unigene_rep_c31292;unigene_rep_c33902;unigene_rep_c35337;unigene_rep_c36240;unigene_s48484	K00680+K01856+K01692+K01055+K07513+K00632+K00626
Notch signaling pathway	7	32	0.775363	1	ko04330	unigene_c1631;unigene_c2574;unigene_c5860;unigene_c8830;unigene_c17890;unigene_rep_c21233;unigene_rep_c25218	K04498+K06067+K06060+K06171+K06172
Other types of O-glycan biosynthesis	4	19	0.777095	1	ko00514	unigene_c5384;unigene_s48261;unigene_s50179;unigene_s51360	K03691+K09667
Anthocyanin biosynthesis	1	5	0.782681	1	ko00942	unigene_c16946	K12338
Glycosphingolipid biosynthesis - ganglio series	2	10	0.784189	1	ko00604	unigene_rep_c30429;unigene_rep_c33112	K12309
Synthesis and degradation of ketone bodies	2	10	0.784189	1	ko00072	unigene_rep_c27451;unigene_s48484	K01640+K00626
Chlorocyclohexane and chlorobenzene degradation	6	28	0.784657	1	ko00361	unigene_c2925;unigene_c5464;unigene_c13074;unigene_c13397;unigene_rep_c22762;unigene_s50901	K00224+K01563+K01860+K01856+K01061
Wnt signaling pathway	50	209	0.80598	1	ko04310	unigene_c1631;unigene_c2684;unigene_c5324;unigene_c5860;unigene_c6442;unigene_c8410;unigene_c17302;unigene_c17863;unigene_c20138;unigene_rep_c20878;unigene_rep_c20889;unigene_rep_c20987;unigene_rep_c21233;unigene_rep_c22753;unigene_rep_c22827;unigene_rep_c26056;unigene_rep_c31072;unigene_rep_c31167;unigene_rep_c31913;unigene_rep_c32923;unigene_rep_c33053;unigene_rep_c33812;unigene_rep_c34133;unig…	K04498+K03094+K04512+K04508+K11584+K04514+K03456+K04506+K06268+K03083+K04382+K02677+K03362+K04392+K04427+K01397+K03115
Alanine, aspartate and glutamate metabolism	18	80	0.815552	1	ko00250	unigene_c237;unigene_c2728;unigene_c2758;unigene_c14264;unigene_rep_c32044;unigene_rep_c33078;unigene_rep_c33120;unigene_rep_c33819;unigene_rep_c33845;unigene_rep_c34539;unigene_rep_c36109;unigene_s46066;unigene_s47879;unigene_s49545;unigene_s49582;unigene_s49607;unigene_s51077;unigene_s51132	K00820+K01915+K00813+K01955+K00814+K00261+K00609+K01939
Flavonoid biosynthesis	41	174	0.818676	1	ko00941	unigene_c181;unigene_c2567;unigene_c2806;unigene_c2925;unigene_c7641;unigene_c8405;unigene_c9678;unigene_c9855;unigene_c11362;unigene_c13397;unigene_c13467;unigene_c13634;unigene_c17098;unigene_c17312;unigene_c17611;unigene_c18534;unigene_c19022;unigene_c20561;unigene_rep_c21289;unigene_rep_c22661;unigene_rep_c24582;unigene_rep_c24967;unigene_rep_c25141;unigene_rep_c30381;unigene_rep_c31564;unige…	K13083+K05280+K13082+K08695+K00588+K13081+K09754+K00660+K05278+K00091+K00475+K05277+K13065+K00487
Stilbenoid, diarylheptanoid and gingerol biosynthesis	33	142	0.823091	1	ko00945	unigene_c1508;unigene_c1631;unigene_c1930;unigene_c2660;unigene_c2806;unigene_c6766;unigene_c7320;unigene_c7641;unigene_c7878;unigene_c8405;unigene_c8945;unigene_c9306;unigene_c9678;unigene_c13680;unigene_c17312;unigene_c17367;unigene_c17611;unigene_c19195;unigene_rep_c21233;unigene_rep_c22661;unigene_rep_c24582;unigene_rep_c24967;unigene_rep_c25141;unigene_rep_c31564;unigene_rep_c34296;unigene_r…	K00517+K00588+K09754+K13065+K00487
Galactose metabolism	29	126	0.82687	1	ko00052	unigene_c1377;unigene_c2408;unigene_c2907;unigene_c3068;unigene_c4361;unigene_c4710;unigene_c6174;unigene_c10405;unigene_c13358;unigene_c13642;unigene_c17527;unigene_c20260;unigene_rep_c21471;unigene_c25729;unigene_rep_c25891;unigene_rep_c30331;unigene_rep_c30429;unigene_rep_c30764;unigene_rep_c31931;unigene_rep_c32945;unigene_rep_c32992;unigene_rep_c33112;unigene_rep_c33376;unigene_rep_c33519;un…	K01193+K00850+K01187+K01190+K12308+K00964+K00965+K01835+K00844+K07407+K01784+K12309+K00963+K06611
Sulfur relay system	2	11	0.828559	1	ko04122	unigene_c9878;unigene_rep_c33358	K00566+K01011
Lysine degradation	19	85	0.829391	1	ko00310	unigene_c775;unigene_c1119;unigene_c2061;unigene_c2463;unigene_c4246;unigene_c4788;unigene_c8082;unigene_c20121;unigene_rep_c21621;unigene_rep_c23712;unigene_rep_c29662;unigene_rep_c31292;unigene_rep_c34253;unigene_rep_c35855;unigene_rep_c35901;unigene_rep_c36158;unigene_s48484;unigene_s49490;unigene_s50356	K11420+K11419+K01582+K13647+K00306+K11423+K06101+K00128+K00291+K00290+K00292+K01692+K00626
beta-Alanine metabolism	17	77	0.834866	1	ko00410	unigene_c12153;unigene_c19642;unigene_rep_c21621;unigene_rep_c23712;unigene_rep_c31292;unigene_rep_c34128;unigene_rep_c34253;unigene_rep_c34349;unigene_rep_c35855;unigene_rep_c35901;unigene_rep_c36158;unigene_s45675;unigene_s48103;unigene_s48784;unigene_s49490;unigene_s50356;unigene_s51244	K00797+K05605+K00128+K00129+K01692+K00249+K13367
mRNA surveillance pathway	29	127	0.839661	1	ko03015	unigene_c4854;unigene_c8112;unigene_c8410;unigene_c8602;unigene_c10423;unigene_c13682;unigene_c14257;unigene_c17594;unigene_c17863;unigene_c18723;unigene_c19938;unigene_rep_c20987;unigene_rep_c26056;unigene_rep_c30038;unigene_rep_c31913;unigene_rep_c33774;unigene_rep_c34133;unigene_rep_c34837;unigene_rep_c34901;unigene_rep_c35210;unigene_rep_c35236;unigene_rep_c35284;unigene_s46253;unigene_s47093…	K11583+K13126+K11584+K12875+K06100+K04354+K03456+K08873+K12883+K04382+K12877+K12812
Caffeine metabolism	1	6	0.839864	1	ko00232	unigene_c11385	K00106
Fatty acid elongation in mitochondria	1	6	0.839864	1	ko00062	unigene_c13581	K01074
Lysosome	45	193	0.849009	1	ko04142	unigene_c3183;unigene_c4003;unigene_c4138;unigene_c4428;unigene_c4533;unigene_c5689;unigene_c6072;unigene_c8363;unigene_c8544;unigene_c8885;unigene_c9307;unigene_c10977;unigene_c10992;unigene_c12311;unigene_c13581;unigene_c16740;unigene_c16987;unigene_c17033;unigene_c18371;unigene_c19723;unigene_c20593;unigene_rep_c22509;unigene_rep_c22863;unigene_rep_c23652;unigene_rep_c23828;unigene_rep_c24550;…	K12311+K12398+K01444+K12399+K12386+K13289+K12391+K12301+K02154+K01052+K02155+K01074+K04646+K12403+K05656+K06129+K12309+K02146+K12394+K01369+K12402+K12393+K12347
Pyrimidine metabolism	42	181	0.850614	1	ko00240	unigene_c555;unigene_c1621;unigene_c2168;unigene_c2887;unigene_c3056;unigene_c3345;unigene_c3462;unigene_c3738;unigene_c4202;unigene_c5728;unigene_c8295;unigene_c9449;unigene_c9753;unigene_c9828;unigene_c10018;unigene_c11452;unigene_c13677;unigene_c14264;unigene_c16793;unigene_c17280;unigene_c17595;unigene_c17811;unigene_c19910;unigene_rep_c20947;unigene_rep_c21202;unigene_rep_c21682;unigene_rep_…	K01718+K03015+K10807+K00876+K01510+K03008+K03009+K03010+K10808+K01937+K02684+K01511+K00943+K02999+K03002+K00962+K03017+K01955+K03013+K03504+K02327+K03026+K03014+K03024+K03025+K03012+K02328+K00609+K13800+K00940
Steroid hormone biosynthesis	5	26	0.852658	1	ko00140	unigene_c2469;unigene_c3568;unigene_c11139;unigene_c11680;unigene_rep_c27327	K00044+K00071+K07424+K12343
Geraniol degradation	3	17	0.864064	1	ko00281	unigene_rep_c27451;unigene_rep_c31292;unigene_rep_c36240	K01640+K01692+K00632
Thiamine metabolism	3	17	0.864064	1	ko00730	unigene_c457;unigene_c3790;unigene_c11197	K03147+K06928
DDT degradation	2	12	0.864525	1	ko00351	unigene_c2925;unigene_c13397	K00224
Protein digestion and absorption	4	22	0.868846	1	ko04974	unigene_c3878;unigene_c4677;unigene_c13292;unigene_rep_c22622	K05849+K01278+K06236
Phosphatidylinositol signaling system	34	151	0.877146	1	ko04070	unigene_c3177;unigene_c3467;unigene_c3740;unigene_c4953;unigene_c8153;unigene_c9298;unigene_c13156;unigene_c17437;unigene_c17516;unigene_c17591;unigene_c17861;unigene_c17924;unigene_c17938;unigene_rep_c21507;unigene_rep_c22264;unigene_rep_c22601;unigene_rep_c22753;unigene_rep_c22827;unigene_rep_c25634;unigene_rep_c26039;unigene_rep_c31602;unigene_rep_c32646;unigene_rep_c33267;unigene_rep_c34106;u…	K00901+K13711+K05857+K01099+K02183+K00888+K00913+K00921+K00889+K00981+K01110+K02677
Nucleotide excision repair	17	80	0.877996	1	ko03420	unigene_c792;unigene_c2827;unigene_c3182;unigene_c3520;unigene_c8580;unigene_c12967;unigene_c17280;unigene_c17811;unigene_c17813;unigene_c18391;unigene_c19574;unigene_rep_c22557;unigene_rep_c31982;unigene_rep_c32054;unigene_rep_c33353;unigene_s49792;unigene_s50754	K07466+K10570+K10739+K03143+K10846+K10747+K03504+K02327+K10610+K10140+K03144+K10840+K02328+K10609
Valine, leucine and isoleucine biosynthesis	13	63	0.880555	1	ko00290	unigene_c4508;unigene_c6113;unigene_c7544;unigene_c9226;unigene_c10002;unigene_c10771;unigene_c13388;unigene_rep_c25199;unigene_rep_c33950;unigene_rep_c34706;unigene_s46693;unigene_s47720;unigene_s49900	K01653+K01873+K01869+K00161+K00162+K00053
alpha-Linolenic acid metabolism	24	110	0.882797	1	ko00592	unigene_c18;unigene_c159;unigene_c985;unigene_c1610;unigene_c5215;unigene_c8122;unigene_c11091;unigene_c11139;unigene_c13180;unigene_c14318;unigene_c18048;unigene_rep_c31562;unigene_rep_c33216;unigene_rep_c34131;unigene_rep_c34393;unigene_rep_c34505;unigene_rep_c35537;unigene_rep_c35541;unigene_rep_c36240;unigene_s45945;unigene_s48313;unigene_s49369;unigene_s49914;unigene_s51382	K00454+K00232+K10525+K01047+K10527+K08241+K00632+K10526
Butanoate metabolism	18	85	0.886967	1	ko00650	unigene_c2469;unigene_c2817;unigene_c4385;unigene_c4508;unigene_c6113;unigene_c11622;unigene_c11680;unigene_c12205;unigene_rep_c25199;unigene_rep_c25441;unigene_rep_c27451;unigene_rep_c31292;unigene_rep_c32791;unigene_rep_c33950;unigene_rep_c34706;unigene_s46693;unigene_s48484;unigene_s49900	K00100+K01653+K00161+K01640+K01692+K00162+K00626
Ascorbate and aldarate metabolism	18	85	0.886967	1	ko00053	unigene_c1274;unigene_c9046;unigene_c9617;unigene_c18005;unigene_c19272;unigene_rep_c21301;unigene_rep_c21621;unigene_rep_c23712;unigene_rep_c28603;unigene_rep_c34253;unigene_rep_c34923;unigene_rep_c35855;unigene_rep_c35901;unigene_rep_c36158;unigene_s47620;unigene_s48771;unigene_s49490;unigene_s50356	K00423+K01053+K00012+K00128+K10046+K00434
Zeatin biosynthesis	9	46	0.889317	1	ko00908	unigene_c295;unigene_c4747;unigene_c4827;unigene_c6895;unigene_c10219;unigene_c11139;unigene_c20534;unigene_rep_c24098;unigene_rep_c34871	K10760+K00791+K13493+K13495+K10717
Lysine biosynthesis	4	24	0.910103	1	ko00300	unigene_c18175;unigene_c18352;unigene_rep_c29662;unigene_rep_c36072	K00928+K00291+K00290+K00215
Cell cycle - Caulobacter	5	29	0.912204	1	ko04112	unigene_c4338;unigene_c11298;unigene_c13898;unigene_c20839;unigene_rep_c35251	K01338+K01358+K03531+K02488+K03544
Photosynthesis	6	34	0.91555	1	ko00195	unigene_c7958;unigene_c9445;unigene_c9665;unigene_c17633;unigene_c17966;unigene_rep_c33931	K02635+K02717+K02639+K02109+K02641
Valine, leucine and isoleucine degradation	20	97	0.92097	1	ko00280	unigene_c19642;unigene_rep_c21621;unigene_rep_c22680;unigene_rep_c23712;unigene_rep_c27451;unigene_rep_c30811;unigene_rep_c31292;unigene_rep_c34128;unigene_rep_c34253;unigene_rep_c34349;unigene_rep_c35855;unigene_rep_c35901;unigene_rep_c36158;unigene_rep_c36240;unigene_s48103;unigene_s48484;unigene_s48861;unigene_s49490;unigene_s50356;unigene_s51244	K05605+K00128+K00020+K01640+K00166+K01692+K00249+K07513+K00632+K00626+K00382
Fructose and mannose metabolism	32	149	0.927337	1	ko00051	unigene_c887;unigene_c1336;unigene_c2408;unigene_c2469;unigene_c2612;unigene_c2817;unigene_c2892;unigene_c4385;unigene_c4582;unigene_c9775;unigene_c11243;unigene_c11622;unigene_c11680;unigene_c12205;unigene_c13642;unigene_c18644;unigene_c19490;unigene_c19747;unigene_rep_c23182;unigene_rep_c25441;unigene_rep_c25700;unigene_rep_c27130;unigene_rep_c31839;unigene_rep_c31931;unigene_rep_c32791;unigene…	K01809+K12660+K00850+K00100+K00847+K01112+K01711+K00844+K00008+K01803+K01623+K00971+K00966+K01840+K01805+K00895
Protein export	17	85	0.929594	1	ko03060	unigene_c2792;unigene_c4190;unigene_c9394;unigene_c18013;unigene_rep_c26032;unigene_c27616;unigene_rep_c29707;unigene_rep_c32150;unigene_rep_c32718;unigene_rep_c32863;unigene_rep_c33362;unigene_rep_c34733;unigene_rep_c35291;unigene_rep_c35303;unigene_rep_c35721;unigene_s47206;unigene_s51212	K09647+K03117+K03109+K10956+K03110+K03107+K03105+K12272+K03100+K12948+K09490
Mismatch repair	8	45	0.934588	1	ko03430	unigene_c792;unigene_c3182;unigene_c3901;unigene_c12967;unigene_c17280;unigene_c17811;unigene_rep_c31982;unigene_rep_c33353	K07466+K10739+K08739+K10747+K03504+K02327+K02328
Fatty acid metabolism	24	118	0.946446	1	ko00071	unigene_c1610;unigene_c1689;unigene_c3808;unigene_c11139;unigene_c13635;unigene_c17631;unigene_c17738;unigene_rep_c21014;unigene_rep_c21621;unigene_rep_c23712;unigene_rep_c27734;unigene_rep_c30453;unigene_rep_c31292;unigene_rep_c31873;unigene_rep_c34089;unigene_rep_c34128;unigene_rep_c34253;unigene_rep_c35855;unigene_rep_c35901;unigene_rep_c36158;unigene_rep_c36240;unigene_s48484;unigene_s49490;u…	K00232+K00001+K01897+K08766+K00128+K01692+K00249+K07513+K00632+K00626
Phosphonate and phosphinate metabolism	2	16	0.949287	1	ko00440	unigene_c2606;unigene_rep_c32283	K00967+K00968
RNA transport	61	275	0.951072	1	ko03013	unigene_c978;unigene_c2057;unigene_c2869;unigene_c3010;unigene_c3555;unigene_c5292;unigene_c6747;unigene_c8112;unigene_c8287;unigene_c8602;unigene_c10105;unigene_c10577;unigene_c11613;unigene_c14193;unigene_c14290;unigene_c17172;unigene_c18476;unigene_c19304;unigene_c19938;unigene_c19970;unigene_rep_c21443;unigene_rep_c21943;unigene_rep_c22579;unigene_rep_c22698;unigene_rep_c24108;unigene_rep_c24…	K12878+K03241+K03260+K03540+K13174+K12880+K13126+K03538+K12875+K12879+K03238+K12160+K03257+K03252+K12883+K13136+K13175+K07936+K03262+K03236+K07562+K00784+K03259+K12877+K10577+K03231+K12812+K03237
Vitamin digestion and absorption	1	10	0.952799	1	ko04977	unigene_c9559	K05665
RNA degradation	41	192	0.953034	1	ko03018	unigene_c246;unigene_c1781;unigene_c4191;unigene_c5331;unigene_c5427;unigene_c6125;unigene_c6958;unigene_c7827;unigene_c8112;unigene_c8151;unigene_c8212;unigene_c8399;unigene_c8973;unigene_c11452;unigene_c11487;unigene_c13542;unigene_c15433;unigene_c16753;unigene_c17461;unigene_c17489;unigene_c19602;unigene_rep_c20937;unigene_rep_c21202;unigene_rep_c21368;unigene_rep_c22878;unigene_c27073;unigene…	K12602+K12589+K12587+K11927+K12626+K12580+K12620+K12625+K13126+K12605+K12619+K12603+K00962+K04077+K10643+K12600+K12581+K05592+K08311+K12614+K01689+K12591+K04043
Mineral absorption	3	22	0.953691	1	ko04978	unigene_rep_c34923;unigene_s48651;unigene_s50662	K00522+K12347
Limonene and pinene degradation	36	171	0.953791	1	ko00903	unigene_c1133;unigene_c1508;unigene_c1631;unigene_c1930;unigene_c2448;unigene_c2660;unigene_c3937;unigene_c4488;unigene_c5503;unigene_c6766;unigene_c7320;unigene_c7878;unigene_c8945;unigene_c9306;unigene_c10605;unigene_c13680;unigene_c17312;unigene_c17367;unigene_c17611;unigene_c18548;unigene_c19195;unigene_rep_c21233;unigene_rep_c21621;unigene_rep_c22089;unigene_rep_c23712;unigene_rep_c24967;uni…	K00680+K00517+K01076+K00128+K01692
Aminoacyl-tRNA biosynthesis	20	102	0.954551	1	ko00970	unigene_c4132;unigene_c6043;unigene_c7544;unigene_c9226;unigene_c10002;unigene_c10087;unigene_c10771;unigene_c12985;unigene_c13388;unigene_c14011;unigene_c17971;unigene_c20543;unigene_rep_c24017;unigene_rep_c25155;unigene_rep_c25418;unigene_rep_c32035;unigene_rep_c32072;unigene_rep_c32601;unigene_rep_c33353;unigene_s49080	K01885+K01883+K01873+K01869+K02433+K01893+K01881+K01872+K01874+K04567+K01887
Styrene degradation	2	17	0.96065	1	ko00643	unigene_c10087;unigene_c14011	K01426
Pentose phosphate pathway	15	81	0.961673	1	ko00030	unigene_c2072;unigene_c2408;unigene_c3163;unigene_c3653;unigene_c4385;unigene_c10848;unigene_c13358;unigene_c19272;unigene_c19747;unigene_rep_c24506;unigene_rep_c31008;unigene_rep_c31568;unigene_rep_c33197;unigene_rep_c36204;unigene_s49880	K01807+K00850+K01057+K00616+K00117+K01835+K01053+K01623+K00948+K01810+K00033
Chloroalkane and chloroalkene degradation	26	130	0.962192	1	ko00625	unigene_c1689;unigene_c2469;unigene_c2817;unigene_c4385;unigene_c5228;unigene_c5464;unigene_c11251;unigene_c11622;unigene_c11680;unigene_c12205;unigene_c13635;unigene_c16898;unigene_rep_c21621;unigene_rep_c23712;unigene_rep_c23921;unigene_rep_c25441;unigene_rep_c32791;unigene_rep_c34253;unigene_rep_c35855;unigene_rep_c35901;unigene_rep_c35918;unigene_rep_c36158;unigene_s49490;unigene_s49648;unige…	K00001+K00100+K08726+K01563+K01564+K00128
Linoleic acid metabolism	18	95	0.963793	1	ko00591	unigene_c18;unigene_c159;unigene_c985;unigene_c2469;unigene_c2817;unigene_c4385;unigene_c5215;unigene_c8122;unigene_c11139;unigene_c11622;unigene_c11680;unigene_c12205;unigene_c13180;unigene_c14318;unigene_rep_c25441;unigene_rep_c32791;unigene_rep_c33216;unigene_rep_c34505	K00454+K00100+K07424+K01047
Tyrosine metabolism	24	122	0.965214	1	ko00350	unigene_c1133;unigene_c1336;unigene_c1463;unigene_c1689;unigene_c2448;unigene_c2758;unigene_c2806;unigene_c3937;unigene_c4938;unigene_c5503;unigene_c8405;unigene_c10605;unigene_c13635;unigene_c18142;unigene_c18548;unigene_rep_c21621;unigene_rep_c22089;unigene_rep_c22511;unigene_rep_c23712;unigene_c25589;unigene_rep_c31620;unigene_rep_c33902;unigene_rep_c34380;unigene_rep_c35057	K00680+K02510+K00599+K00001+K00813+K00817+K00129+K07253
Brassinosteroid biosynthesis	1	11	0.965223	1	ko00905	unigene_c12648	K09587+K12639+K12637+K12638
Tropane, piperidine and pyridine alkaloid biosynthesis	9	54	0.966669	1	ko00960	unigene_c1458;unigene_c2061;unigene_c2758;unigene_c4938;unigene_c5934;unigene_rep_c21584;unigene_rep_c33856;unigene_rep_c36213;unigene_s50621	K01066+K01044+K01582+K00813+K00817+K08081
Polycyclic aromatic hydrocarbon degradation	28	141	0.970268	1	ko00624	unigene_c1463;unigene_c1508;unigene_c1631;unigene_c1930;unigene_c2660;unigene_c2806;unigene_c2925;unigene_c6766;unigene_c7320;unigene_c7878;unigene_c8405;unigene_c8945;unigene_c9306;unigene_c13397;unigene_c13680;unigene_c17312;unigene_c17367;unigene_c17611;unigene_c18142;unigene_c19195;unigene_rep_c21233;unigene_rep_c24967;unigene_rep_c25141;unigene_c25589;unigene_rep_c31620;unigene_rep_c34380;un…	K00599+K00517+K00224
Cysteine and methionine metabolism	35	173	0.974578	1	ko00270	unigene_c2205;unigene_c2486;unigene_c2758;unigene_c3878;unigene_c4239;unigene_c4516;unigene_c4677;unigene_c5933;unigene_c5944;unigene_c12153;unigene_c12531;unigene_c16766;unigene_c17011;unigene_c18175;unigene_c18297;unigene_c18352;unigene_rep_c20868;unigene_rep_c22154;unigene_rep_c26938;unigene_rep_c31513;unigene_rep_c31707;unigene_rep_c33150;unigene_rep_c33358;unigene_rep_c34338;unigene_rep_c348…	K00640+K01762+K00813+K00558+K00797+K09880+K05933+K00928+K00789+K00547+K01611+K00899+K01011+K01251+K01739+K01738
Pantothenate and CoA biosynthesis	5	36	0.976882	1	ko00770	unigene_c4508;unigene_c6113;unigene_c12668;unigene_c13400;unigene_s47720	K01653+K09680+K01598+K00053
Glycolysis / Gluconeogenesis	46	223	0.980171	1	ko00010	unigene_c171;unigene_c1689;unigene_c2408;unigene_c3098;unigene_c4491;unigene_c8597;unigene_c13358;unigene_c13635;unigene_c13642;unigene_c17814;unigene_c19490;unigene_c19747;unigene_rep_c21621;unigene_rep_c23712;unigene_rep_c23946;unigene_rep_c24188;unigene_rep_c25199;unigene_rep_c25415;unigene_rep_c30509;unigene_rep_c31008;unigene_rep_c31931;unigene_rep_c32327;unigene_rep_c33088;unigene_rep_c3379…	K01785+K00001+K00850+K01834+K01895+K01835+K00844+K01803+K01623+K00128+K00129+K00134+K01792+K00161+K00873+K01810+K01689+K00162+K01610+K00382
Pyruvate metabolism	35	176	0.981227	1	ko00620	unigene_c4587;unigene_c8597;unigene_c10075;unigene_c13244;unigene_c17814;unigene_c18699;unigene_rep_c21621;unigene_rep_c21998;unigene_rep_c23712;unigene_rep_c25199;unigene_rep_c26132;unigene_rep_c30509;unigene_rep_c32184;unigene_rep_c33088;unigene_rep_c33950;unigene_rep_c34062;unigene_rep_c34073;unigene_rep_c34253;unigene_rep_c34417;unigene_rep_c34706;unigene_rep_c35751;unigene_rep_c35855;unigene…	K02160+K01895+K11262+K00128+K00101+K00161+K01007+K00873+K01069+K00162+K00025+K01610+K00626+K00382+K00029+K00026
Glycosaminoglycan degradation	2	20	0.981882	1	ko00531	unigene_rep_c30429;unigene_rep_c33112	K12309
Naphthalene degradation	10	63	0.983033	1	ko00626	unigene_c1133;unigene_c1689;unigene_c2448;unigene_c3937;unigene_c5503;unigene_c10605;unigene_c13635;unigene_c18548;unigene_rep_c22089;unigene_rep_c33902	K00680+K00001
Caprolactam degradation	2	21	0.986068	1	ko00930	unigene_c19272;unigene_rep_c31292	K01053+K01692
Selenocompound metabolism	4	33	0.986218	1	ko00450	unigene_c11062;unigene_rep_c24017;unigene_rep_c33353;unigene_rep_c35890	K08247+K01874+K01739
Aminobenzoate degradation	45	224	0.988001	1	ko00627	unigene_c1133;unigene_c1458;unigene_c1508;unigene_c1631;unigene_c1930;unigene_c2448;unigene_c2660;unigene_c3108;unigene_c3937;unigene_c4216;unigene_c5503;unigene_c5934;unigene_c6273;unigene_c6766;unigene_c6961;unigene_c7320;unigene_c7878;unigene_c7971;unigene_c8945;unigene_c9306;unigene_c10087;unigene_c10137;unigene_c10605;unigene_c11139;unigene_c13680;unigene_c14011;unigene_c17312;unigene_c17367…	K00680+K01066+K00517+K01078+K01077+K01113+K01101+K01426+K07424+K01692
Proteasome	22	124	0.99085	1	ko03050	unigene_c1133;unigene_c10605;unigene_c19208;unigene_rep_c21236;unigene_rep_c22089;unigene_rep_c23377;unigene_rep_c32365;unigene_rep_c32443;unigene_rep_c32818;unigene_rep_c33043;unigene_rep_c33457;unigene_rep_c33993;unigene_rep_c35358;unigene_rep_c36200;unigene_rep_c36254;unigene_rep_c37266;unigene_rep_c38160;unigene_s45839;unigene_s47159;unigene_s48647;unigene_s49901;unigene_s51525	K03062+K02731+K11599+K03035+K03039+K03063+K02727+K03061+K02726+K02730+K02729+K02736+K02735
Spliceosome	92	427	0.990887	1	ko03040	unigene_c978;unigene_c1130;unigene_c1226;unigene_c2805;unigene_c3021;unigene_c4536;unigene_c4821;unigene_c4975;unigene_c5219;unigene_c5292;unigene_c5427;unigene_c6209;unigene_c6696;unigene_c6851;unigene_c6943;unigene_c7827;unigene_c8193;unigene_c8302;unigene_c8399;unigene_c8602;unigene_c9611;unigene_c9629;unigene_c9806;unigene_c9820;unigene_c9881;unigene_c10105;unigene_c10171;unigene_c11025;unige…	K12878+K12842+K12896+K12741+K12885+K12859+K12816+K12880+K12626+K12831+K11099+K12868+K12625+K12837+K12818+K12823+K12875+K12860+K12843+K12825+K12879+K11087+K12856+K03283+K12821+K12827+K12836+K12883+K12835+K12848+K12864+K10599+K11088+K12890+K12893+K11094+K11093+K12822+K12839+K11984+K12897+K12877+K12889+K12900+K12812+K12872+K12862+K11092
Ubiquitin mediated proteolysis	68	327	0.991797	1	ko04120	unigene_c117;unigene_c730;unigene_c1369;unigene_c2384;unigene_c2684;unigene_c2827;unigene_c3160;unigene_c3605;unigene_c3686;unigene_c3780;unigene_c4804;unigene_c6292;unigene_c6619;unigene_c7698;unigene_c8134;unigene_c11184;unigene_c12007;unigene_c13536;unigene_c14005;unigene_c15496;unigene_c17813;unigene_c18374;unigene_c18391;unigene_c20138;unigene_c20379;unigene_rep_c21863;unigene_rep_c22075;uni…	K09561+K03364+K10591+K10686+K03094+K10570+K06689+K10601+K04725+K03363+K06688+K04706+K10615+K10606+K03351+K10581+K03350+K10592+K10610+K10144+K10140+K04506+K10575+K10576+K10599+K13305+K10595+K03348+K03362+K10260+K10590+K10577+K10573+K10580+K10609
Porphyrin and chlorophyll metabolism	11	73	0.992701	1	ko00860	unigene_c862;unigene_c1616;unigene_c4132;unigene_c5027;unigene_c19903;unigene_rep_c20993;unigene_rep_c25418;unigene_rep_c32752;unigene_rep_c33116;unigene_rep_c34923;unigene_s50662	K08099+K01772+K01885+K01749+K13544+K02492+K13606+K01698+K00522
Retinol metabolism	6	48	0.993976	1	ko00830	unigene_c1689;unigene_c3528;unigene_c11139;unigene_c13635;unigene_rep_c21575;unigene_rep_c22976	K00001+K11147+K07424+K11153+K11152
Phenylalanine, tyrosine and tryptophan biosynthesis	9	64	0.994051	1	ko00400	unigene_c1181;unigene_c2758;unigene_c4938;unigene_c6527;unigene_c7605;unigene_c17725;unigene_rep_c25081;unigene_rep_c32025;unigene_s50083	K04518+K00813+K00817+K06001+K01609+K01626+K01736+K00800
Inositol phosphate metabolism	20	120	0.995618	1	ko00562	unigene_c3467;unigene_c3740;unigene_c4953;unigene_c9298;unigene_c13156;unigene_c17516;unigene_c17861;unigene_c17938;unigene_c19490;unigene_rep_c21507;unigene_rep_c22264;unigene_rep_c31602;unigene_rep_c32646;unigene_rep_c33267;unigene_rep_c34106;unigene_rep_c35070;unigene_rep_c36017;unigene_rep_c36526;unigene_rep_c36721;unigene_s51501	K13711+K05857+K01099+K00888+K00913+K00921+K00889+K01803+K01110
Metabolic pathways	779	3182	0.995976	1	ko01100	unigene_c18;unigene_c159;unigene_c181;unigene_c237;unigene_c295;unigene_c323;unigene_c381;unigene_c420;unigene_c457;unigene_c511;unigene_c647;unigene_c862;unigene_c887;unigene_c985;unigene_c994;unigene_c1051;unigene_c1166;unigene_c1181;unigene_c1199;unigene_c1274;unigene_c1377;unigene_c1458;unigene_c1463;unigene_c1508;unigene_c1515;unigene_c1539;unigene_c1551;unigene_c1554;unigene_c1578;unigene_c…	K00454+K05280+K00820+K10760+K05290+K01934+K01051+K03147+K00514+K01213+K01184+K08099+K01809+K10158+K10812+K10157+K04518+K00423+K01193+K01044+K01046+K00933+K00517+K00770+K12657+K10775+K01115+K00232+K00860+K01772+K03015+K00001+K01054+K00938+K08679+K01582+K01583+K01807+K00021+K10807+K00640+K12669+K00850+K00044+K00100+K01762+K00967+K03183+K02366+K01915+K00813+K00588+K07748+K00876+K01187+K01585+K13510+…
Biosynthesis of secondary metabolites	344	1469	0.996499	1	ko01110	unigene_c126;unigene_c171;unigene_c181;unigene_c295;unigene_c511;unigene_c862;unigene_c887;unigene_c1166;unigene_c1181;unigene_c1458;unigene_c1508;unigene_c1554;unigene_c1616;unigene_c1618;unigene_c1631;unigene_c1689;unigene_c1930;unigene_c1944;unigene_c2061;unigene_c2072;unigene_c2137;unigene_c2408;unigene_c2486;unigene_c2567;unigene_c2612;unigene_c2637;unigene_c2645;unigene_c2652;unigene_c2660;…	K05350+K01785+K13083+K05280+K05356+K10760+K00514+K08099+K01809+K04518+K01044+K00517+K10775+K01772+K11820+K13030+K00001+K00938+K01582+K01807+K00021+K00850+K01762+K08695+K03183+K00813+K00588+K13081+K01834+K01057+K04126+K00616+K01852+K01490+K01885+K00117+K01653+K02160+K13789+K00791+K08246+K06127+K00817+K01749+K00088+K08680+K12929+K07385+K06001+K09755+K05349+K01188+K01853+K09754+K09837+K02548+K01895+…
Carbon fixation in photosynthetic organisms	17	108	0.99695	1	ko00710	unigene_c2072;unigene_c2758;unigene_c10346;unigene_c10848;unigene_c19490;unigene_c19747;unigene_rep_c30509;unigene_rep_c31568;unigene_rep_c32044;unigene_rep_c33088;unigene_rep_c34062;unigene_rep_c35751;unigene_rep_c36333;unigene_s46670;unigene_s49566;unigene_s51064;unigene_s51372	K01807+K00813+K01601+K01803+K01623+K00873+K00814+K00025+K01610+K00029+K00026
Bisphenol degradation	29	165	0.997036	1	ko00363	unigene_c1458;unigene_c1508;unigene_c1631;unigene_c1930;unigene_c2469;unigene_c2660;unigene_c2817;unigene_c4385;unigene_c5934;unigene_c6766;unigene_c7320;unigene_c7878;unigene_c8945;unigene_c9306;unigene_c11622;unigene_c11680;unigene_c12205;unigene_c13680;unigene_c17312;unigene_c17367;unigene_c17611;unigene_c19195;unigene_rep_c21233;unigene_rep_c21584;unigene_rep_c24967;unigene_rep_c25141;unigene…	K01066+K00517+K00100
ABC transporters	14	94	0.997325	1	ko02010	unigene_c1411;unigene_c2787;unigene_c8590;unigene_c8928;unigene_c9296;unigene_c9559;unigene_c9629;unigene_c11569;unigene_c13136;unigene_c13966;unigene_c14365;unigene_c17601;unigene_rep_c22863;unigene_rep_c32170	K08712+K02033+K05658+K05664+K05677+K05678+K02193+K05667+K05665+K05684+K05666+K05656+K05657+K05681
Isoquinoline alkaloid biosynthesis	1	21	0.998363	1	ko00950	unigene_c2758	K00813
Vitamin B6 metabolism	1	22	0.998794	1	ko00750	unigene_rep_c21796	K13248
Nicotinate and nicotinamide metabolism	1	25	0.999518	1	ko00760	unigene_c7629	K00858
Glycine, serine and threonine metabolism	9	78	0.999607	1	ko00260	unigene_c4246;unigene_c4492;unigene_c4788;unigene_c6527;unigene_c18175;unigene_c18352;unigene_rep_c33802;unigene_s48861;unigene_s51514	K00306+K01079+K06001+K00928+K00058+K00382+K00600
